# Supplementary material for: Convergent evolution of antiviral machinery derived from endogenous retrovirus truncated envelope genes in multiple species
Source: PubMed Central journal article supplement — Proc Natl Acad Sci U S A. 2022 Jun 24;119(26):e2114441119. doi: 10.1073/pnas.2114441119 (PMC9245640; doi:10.1073/pnas.2114441119), 2022-06-24
Supplement: pnas.2114441119.sapp.pdf [file pnas.2114441119.sapp.pdf]

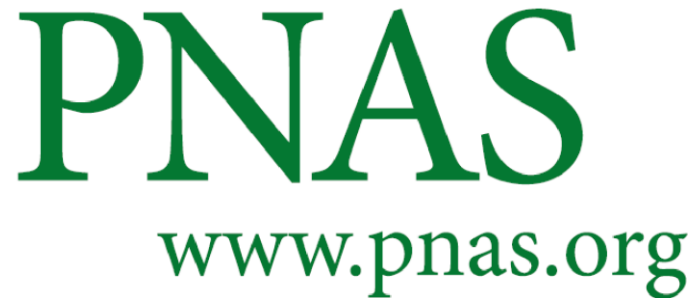

## **Supplementary Information for**

Convergent evolution of antiviral machinery derived from endogenous retrovirus truncated envelope genes in multiple species

Ariko Miyake, Minh Ha Ngo, Shelly Wulandari, Masayuki Shimojima, So Nakagawa, Junna Kawasaki, Kazuo Nishigaki\*

\*Corresponding author: Kazuo Nishigaki

**Email:** [kaz@yamaguchi-u.ac.jp](mailto:kaz@yamaguchi-u.ac.jp)

**Tel.:** +81-83-933-5829

### **This PDF file includes:**

Supplementary text

Figures S1 to S15

Tables S1 to S2

Dataset S1. SRA Run accession, genome file, and gene annotation file used for the mapping analysis.

Dataset S2. Sequence accession numbers used for phylogenetic analyses.

SI References

## Supplementary Information Text

### Supplementary Materials and Methods

**Cell culture.** Cells were cultured in high-glucose Dulbecco's modified Eagle medium (FUJIFILM Wako Pure Chemical Corporation, Osaka, Japan) supplemented with 10% fetal bovine serum. Cells were incubated in a CO<sub>2</sub> incubator at 37°C. In this study, we used the following cell lines: HEK293T (human embryonic kidney transformed with SV40 large T antigen), MDTF (*Mus dunni* fibroblast tail), HepG2 (human), Cos7 (African green monkey), Vero (African green monkey), CRFK (cat), BHK-21 (hamster), 104C1 (guinea pig), KwDM (dog), and MDBK (cattle) cells, as well as HEK293T cells persistently infected with feline leukemia virus (FeLV)-D (293T/FeLV-D), FeLV-B (293T/FeLV-B), endogenous retrovirus of domestic cats (ERV-DC)14TA (293T/ERV-DC14) that has a thymine-to-adenine mutation in the ERV-DC14 provirus LTR, and ERV-DC10 (293T/ERV-DC10) (1,2,3). Additionally, GPLac cells harboring a murine leukemia virus (MLV) Gag-Pol expression vector and a pMXs retroviral vector carrying a LacZ marker were cultured under the same conditions.

MDTF/feline copper transport protein 1 (feCTR1), MDTF/human copper transport protein 1 (huCTR1), MDTF/pFUΔss empty vector, MDTF/human copper transport protein 2 (huCTR2), and MDTF-pMSCVneo empty vector cell lines were established. Briefly, MDTF cells were transfected with expression vectors (pFUΔss-feCTR1 or pFUΔss empty vector as a control) using Lipofectamine@3000 reagent (Thermo Fisher Scientific, Waltham, MA, USA). Single cells were cultured in medium containing 200 µg/mL zeocin (InvivoGen, San Diego, CA, USA) in 96-well plates and single cells were isolated. PLAT-E packaging cells were transfected with expression vectors (pMSCVneo-huCTR1, pMSCVneo-huCTR2, or pMSCVneo empty vector) using TransIT@-293 reagent and supernatants were used to infect MDTF cells. Cells were cultured in medium containing 600 µg/mL neomycin. These cells were termed MDTF-feCTR1, MDTF-pFUΔss empty, MDTF-huCTR1, MDTF-huCTR2, and MDTF-pMSCVneo empty.

**cDNA cloning and establishment of cell lines expressing CTR1.** Feline RNA was extracted from the feline lymphoma FT-1 cell line using the RNeasy Mini Kit (Qiagen, Venlo, Netherlands). To obtain the feline CTR1 sequence, 5' rapid amplification of cDNA ends was conducted using the 5'-Full RACE Core Set (Takara, Kusatsu, Japan) and the following primers: RT-primer (5'-CTGCTTCCCACTGC-3', 5'-phosphorylated), S1-primer (5'-CAAGATAGCCCGAGAGAGCCTAC-3'), S2-primer (5'-GAGACACACAAAAGTGTGGGCA-3'), A1-primer (5'-AAAACACTGCCACGAAAGCTCC-3'), and A2-primer (5'-ACATCATCATACCGTCCATTCCCC-3'). We obtained approximately 1.0 kb of feline CTR1 sequence showing 100% homology with the predicted *Felis catus* solute carrier family 31 member 1 (SLC31A1) (accession number XM\_023242310.1). Feline CTR1 cDNA was PCR-amplified using cDNA from the FT-1 cell line as a template with KOD One Master Mix (Toyobo, Osaka, Japan) and the primer pair Fe-652S (5'-ATTGGTGACGGGTTAAGGTTCCA-3') and Fe-627R (5'-TAAGGCCACACCATGGAGTTGAACG-3'). The amplicon was cloned into the pCR4 Blunt-TOPO vector (Invitrogen, Carlsbad, CA, USA). To construct the feCTR1 expression plasmids, the primer pairs Fe-654S (5'-GAATTCGAATTCGCCGCCACCATGTACCCATACGATGTTCCAGATTACGCTCTCGAGATGGC TGACAACAGTACAACG-3') and Fe-628R (5'-AGATCTAGATCTCTAATGGCAATGCTCTGTGATGTCCAC-3'), as well as Fe-654S and Fe-629R (5'-GCTAGCGCTAGCCTAATGGCAATGCTCTGTGATGTCCAC-3'), were used to amplify the feCTR1 ORF. The primers encoded *EcoRI* and *BglII* restriction sites for pMSCVneo (Takara) and *EcoRI* and *NheI* restriction sites for pFUΔss (InvivoGen). The feCTR1 ORF was fused with an N-terminal hemagglutinin (HA) tag. Human CTR1 was PCR-amplified from the HEK293 cDNA library using the primers hCTR1-cl-F1 (5'-TCTAGAATTCCTCGAGATGGATCATTCCCACCATATGG-3') and hCTR1-cl-R1 (5'-TAACAGATCTGAATTCTCAATGGCAATGCTCTGTGATATCC-3'). The amplicon was digested with *XhoI* and *BglII*, and then replaced with the sequence of the pMSCVneo-feCTR1 plasmid, producing the pMSCVneo-huCTR1 plasmid. A DNA construct encoding N-terminally c-Myc-

tagged huCTR2 was synthesized (GENEWIZ, Shinagawa, Japan) using the NCBI reference sequence (accession NP\_001851.1). The cDNA was cloned into the pMSCVneo vector using *EcoRI*.

**Quantitative RT-PCR of feline CTR1.** Total RNA was extracted from the tissues of a specific pathogen-free cat (Kyoto-SPF1) and from the feline cell lines AH927, G355, CRFK, Fet-J, MCC, 3201, and MS4 using an RNAiso Plus kit (Takara), in accordance with the manufacturer's instructions. Thereafter, cDNA was synthesized using a PrimeScript II first-strand cDNA synthesis kit (Takara), in accordance with the manufacturer's instructions. Prior to reverse transcription, RNA samples were treated with recombinant DNase I (TaKaRa). cDNA was amplified with SYBR Premix Ex Taq II (Tli RNaseH Plus; Takara) in a CFX96 Touch real-time PCR detection system (Bio-Rad, Hercules, CA, USA). Feline CTR1 was amplified using primers Fe-657S (5'-GCCTACTGCGTAAGTCACAAG-3') and Fe-632R (5'-TGCAGGAGGTGGGGAAAGCTC-3'). Feline peptidyl prolyl isomerase A (PPIA) was amplified using primers Fe-227S (5'-GTCAACCCCATCGTGTTTTT-3') and Fe-204R (5'-CTGCTGTCTTGGGAACCTTTGTC-3').

**Quantification of expression levels of truncated *env*, full-length *env*, and CTR1 in primate tissues using publicly available data.** The expression levels of truncated *env*, full-length *env*, and CTR1 were analyzed using publicly available RNA-seq data. The RNA-seq data were downloaded from the NCBI Sequence Read Archive (SRA) database (4) by fasterq-dump (version 2.10.0) (<https://github.com/ncbi/sra-tools>) and preprocessed by fastp (version 0.20.1) (5) with options "-w 4," "-y -3," and "-x." Generation of genome indexes and mapping analysis were conducted by STAR (version 2.7.8a) (6) with the default parameters. The expression levels were calculated as transcripts per million (TPM) using the formula:  $TPM = \frac{RPKM}{\sum(RPKM)} * 10^6$ . Reads per kilobase of exon per million mapped reads (RPKM) were calculated by featureCounts (version 2.0.1) (7). Mapped patterns of RNA-seq reads were visualized by IGV (version 2.9.4) (8). SRA Run accession, genome file, and gene annotation file for mapping analysis are shown in Dataset S1. Because RNA-seq data were unavailable, we did not investigate expression levels in the following tissues: brain (temporal lobe), colon, and lymph node in rhesus macaque; and testes and ovaries in crab-eating macaque and chimpanzee.

**Expression of CTR1 and truncated *env* in crab-eating macaque.** Total RNAs from testis and ovary in crab-eating macaque were obtained from Fukushima Medical University Medical-Industrial Translational Research Center (TR Center), and were used for cDNA synthesis. cDNA was synthesized using a PrimeScript II first-strand cDNA synthesis kit (Takara), in accordance with the manufacturer's instructions. CTR1 was amplified with SYBR Premix Ex Taq II (Tli RNaseH Plus; Takara) in a CFX96 Touch real-time PCR detection system (Bio-Rad) using primers hSLC31A1-rtF1 (5'-GCCTGCTGCGTAAGTCACAAG-3') and hSLC31A1-rtR1 (5'-TGCAGGAGGTGAGGAAAGCTC-3'). Glyceraldehyde-3-phosphate dehydrogenase (GAPDH) was amplified using primers hGAPDH-F-Tsu (5'-CACCACCATGGAGAAGGCTG-3') and hGAPDH-R-Tsu (5'-GCTGATGATCTTGAGGCTGTTGT-3'). The expression of truncated *env* gene (CmRV-trunc1) was detected by PCR using KOD One PCR Master Mix Blue (Toyobo), using primers Cmtr-RT-F1(5'-CCACGCGGACATATGAAACCGCCCG-3') and Cmtr-RT-R1(5'-GGACCAACTATAGCAATACAGGTGAGT-3') for a 333bp-amplicon of CmRV-trunc1 or primers Cmtr-RT-F1 and Cmtr-RT-R2 (5'-CCAGTAGGATTGGTGAATCAATGAAT-3') for a 920bp-amplicon of CmRV-trunc1. The thermal cycling conditions were: 35 cycles of amplification, consisting of denaturation at 96 °C for 10 s, annealing at 63 °C for 5 s, and extension at 68 °C for 1 s for the 333-bp amplicon, and denaturation at 96 °C for 10 s, annealing at 67 °C for 5 s, and extension at 68 °C for 1 s for the 920-bp amplicon. Agarose gel electrophoresis of the PCR products was conducted, and the gels were stained by Midori Green Xtra (Nippon Genetics, Bunkyo, Japan). The PCR products were confirmed by sequencing (Fasmac Co., Ltd., Atsugi, Japan). For quantitative RT-PCR of CmERV-trunc1 in testis and ovary, cDNA was amplified with SYBR Premix Ex Taq II (Tli RNaseH Plus; Takara) in a CFX96 Touch real-time PCR detection system. CmRV-

trunc1 was amplified using primers Cmtr-RT-F1 and Cmtr-RT-R1. Crab-eating macaque GAPDH was amplified using primers hGAPDH-F-Tsu and hGAPDH-R-Tsu.

**Pseudotyped virus preparation.** GPLac cells, *env*-negative packaging cells containing a LacZ-coding pMXs retroviral vector, were seeded in six-well plates 1 day prior to transfection. Cells were transfected with *env* expression plasmids to produce LacZ-carrying Env-pseudotyped virus. After 48 h, cell supernatants were collected, filtered through a 0.22- $\mu$ m filter (Merck, Darmstadt Germany), and stored at  $-80^{\circ}\text{C}$ . The following Env expression plasmids were used for pseudotyped virus preparations: pFU $\Delta$ ss clone33 (FeLV-A clone 33 env), pFU $\Delta$ ss GB (FeLV-B Gardner-Arnstein env) (kindly provided by Dr. Hajime Tsujimoto), pFU $\Delta$ ss TG35-2 (FeLV TG35-2 env), pFU $\Delta$ ss Ty2.0 (FeLV-D TY26 env), pFU $\Delta$ ss ON-T(FeLV-D ON-T env), pFU $\Delta$ ss ON-C (FeLV-D ON-C env), pFU $\Delta$ ss 44B (FeLV-D 44B env), pFU $\Delta$ ss DC8 (ERV-DC8 env), pFU $\Delta$ ss DC14 (ERV-DC14 env), pFU $\Delta$ ss DC19 (ERV-DC19 env), pFU $\Delta$ ss DC6 (ERV-DC6 env), pFU $\Delta$ ss DC10 (ERV-DC10 env), and pFU $\Delta$ ss 4070A (amphotropic MLV 4070A env) (1, 3, 9). Reconstituted functional ancestral Envs of ERV-DC7 and ERV-DC16 (i.e., ERV-DC7rec and ERV-DC16rec, respectively) containing the minimal required back mutations (R407G-I427N-T429A and D431Y, respectively) and missing the stop codon were previously described (10). ERV-DC7rec and ERV-DC16rec Env-pseudotyped viruses were prepared using a LacZ-coding pMSCV retroviral vector, rather than a pMXs retroviral vector. Previously described primate *env* genes (chimpanzee CERV1, CERV2, and rhesus macaque RhERV2-A) (11) were commercially synthesized (GENEWIZ). Genes containing C-terminal c-Myc tags were inserted into the pFU $\Delta$ ss vector. A DNA construct encoding a newly identified Env (CmRV1, CmRV1\_1, CmRV1\_2, and RmRV1) in this study from crab-eating macaques and rhesus macaques was commercially synthesized with a c-Myc tag at the 3' end (GENEWIZ). The gene was inserted into the pFU $\Delta$ ss vector.

**Infection assay.** Cells were inoculated with virus in 24-well plates containing 10  $\mu\text{g}/\text{mL}$  polybrene (Santa Cruz Biotechnology, Santa Cruz, CA, USA) for 2 h. After the addition of fresh medium, cells were cultured for 2 days post-infection. To conduct the LacZ assay, culture supernatants were discarded and the cells were fixed with 250  $\mu\text{L}$  of 2% glutaraldehyde for 15 min at room temperature, and then stained with 250  $\mu\text{L}$  of 5-bromo-4-chloro-3-indolyl- $\beta$ -D-galactopyranoside (X-Gal) solution. After incubation at  $37^{\circ}\text{C}$  for 2 h, nuclei in LacZ-positive cells were counted using a microscope and images were saved using a camera.

**Viral interference assay.** 293T/FeLV-D, 293T/FeLV-B, 293T/ERV-DC14, and 293T/ERV-DC10 cells were used as target cells in interference assays. Target cells were infected with each pseudotyped virus in the presence of polybrene for 2 days, and then stained with X-Gal, in accordance with the method described in the “*Infection assay*” subsection. Single-cycle infectivity was assessed by counting blue-stained nuclei.

**Envelope gene synthesis.** The following *env* genes were commercially synthesized (GENEWIZ): CERV1, CERV2, and RhERV2-A (11), and the following *env* genes with a c-Myc tag at the 3' end were CmRV1/RmRV1, CmRV1\_1, CmRV1\_2, CmRV-trunc1, PNRC2-ChRV, PNRC2-BoRV, and CERV2 provirus (ChrY); (Eurofins Genomics, Ohta Japan): BoRV-7 and GoRV-trunc1 (SI Figs. S5 and S15). These *env* genes were cloned into the pFU $\Delta$ ss expression plasmid.

**Viral inhibition assay in the presence of truncated ERV Env proteins.** The truncated Env proteins were prepared from the supernatants of HEK293T cells transfected with pFU $\Delta$ ss ERV-DC7 env, pFU $\Delta$ ss ERV-DC16 env, pFU $\Delta$ ss CmRV-trunc1 env, pFU $\Delta$ ss PNRC2-ChRV env, pFU $\Delta$ ss PNRC2-BoRV env, pFU $\Delta$ ss BoRV-7 env, pFU $\Delta$ ss GoRV-trunc1 env, pFU $\Delta$ ss CERV2 provirus (ChrY) env, or pFU $\Delta$ ss CERV2-trunc env. The supernatants were filtered through a 0.22- $\mu$ m filter and stored at  $-80^{\circ}\text{C}$ . The pFU $\Delta$ ss RmRV-trunc1 env was constructed by site-directed mutagenesis based on pFU $\Delta$ ss CmRV-trunc1 env using the following primers; Cmtr-mt-F1 (5'-

CCGTGGCTGTGGGCCCAACCAAGTGCTGAGCG-3') and Cmtr-mt-R1(5'-CGCTCAGCACTTGGTTGGGGCCACAGCCACGG-3'), and Cmtr-mt-F2 (5'-CCTCCCCTCTCTGATTAGCACCTCCAGCGAGTACAC-3') and Cmtr-mt-R2 (5'-GTGTACTIONCGCTGGAGGTGCTAATCAGAGGAGGGGAGG-3'). CERV2-trunc (corresponding to amino acid positions 1 to 188 of CERV2) was artificially constructed from CERV2 by PCR using the PFU2S primer (5'-ACAGATCCAAGCTGTGACCG-3') and CERV2env-tr2-R (5'-GTAGAATTCTCACAGATCCTCCTCGGAGATCAGCTTCTGCTCGATTAAACCGGTGGTCCATCTGG-3'). The infection assay was conducted as described above. Briefly, target cells were treated with 250  $\mu$ L of cell supernatants containing 10  $\mu$ g/mL polybrene, in 24-well plates; pseudotyped viruses were then incubated with target cells in the presence of 10  $\mu$ g/mL polybrene. After the addition of fresh medium, the cells were stained with X-Gal at 2 days post-infection. Single-cycle infectivity was assessed by counting blue-stained nuclei under a microscope and images were saved using a camera.

**RNA interference.** MISSION® esiRNA (Sigma-Aldrich, Tokyo, Japan) was used to silence human CTR1 expression. Lipofectamine RNAiMAX transfection reagent (Invitrogen) was used to transfect cells with 400 ng of siRNAs targeting human CTR1 or EGFP as a control. The transfection was repeated 24 h later. The next day, cells were trypsinized and seeded in 24-well plates. Cells were infected with pseudotyped viruses the following day and an infection assay was conducted. The expression of CTR1 was evaluated by the following method. Total RNA was extracted from cells using an RNeasy Mini Kit (Qiagen), in accordance with the manufacturer's instructions. Thereafter, cDNA was synthesized using a PrimeScript II first-strand cDNA synthesis kit (Takara), in accordance with the manufacturer's instructions. Prior to reverse transcription, RNA samples were treated with RNase-Free DNase Set (Qiagen). cDNA was amplified with SYBR Premix Ex Taq II (Tli RNaseH Plus; Takara) in a CFX96 Touch real-time PCR detection system (Bio-Rad). Human CTR1 was amplified using primers hSLC31A1-rtF1 and hSLC31A1-rtR1. Human glyceraldehyde-3-phosphate dehydrogenase (GAPDH) was amplified using primers hGAPDH-F-Tsu and hGAPDH-R-Tsu.

**Receptor screening.** The retroviral HEK293 cDNA library constructed in the pMX retroviral vector was prepared as described previously (12). Poly(A)<sup>+</sup> RNA of HEK293 cells was prepared using FastTrack kit ver. 2.0 (Thermo Fisher Scientific), in accordance with the manufacturer's protocol. cDNA was synthesized from the RNA with oligo dT<sub>12-18</sub> primers, random hexamers, and Superscript II Reverse Transcriptase (Invitrogen). Double-stranded cDNA was then synthesized using DNA ligase, DNA polymerase I, and RNase H. Blunt-end cDNA was adapted with *Bst*XI adaptor (Invitrogen) and ligated to the *Bst*XI sites of pMX vector. The ligated DNA was amplified in DH10B competent cells and plasmid DNA was extracted using the Qiagen plasmid midi kit (QIAGEN). MDTF cells were transduced with the retroviral HEK293 cDNA library using the Retrovirus Packaging Kit Ampho (Takara). PLAT-GP cells stably introduced with MLV Gag-Pol were transfected with FeLV-D Ty2.0 Env (FeLV-D TY26) plasmid and either pMSCV-puro (Clontech, Mountain View, CA, USA) or pMXs encoding GFP using TransIT®-293 reagent. The supernatants were collected 2 days later, then filtered (0.22  $\mu$ m) to prepare viral solutions. FeLV-D Env-pseudotyped virus was concentrated using Amicon Ultra-15 10K Centrifugal Filter Devices (Merck). The viruses were stored at -80°C until use. The viral titers were >5×10<sup>5</sup> IU/mL. The FeLV-D (TY26) Env-pseudotyped virus was used to challenge MDTF cells transduced with the cDNA library in eight 10-cm culture dishes; cells were selected with 6  $\mu$ g/mL puromycin (InvivoGen). Cells were then infected with FeLV-D Env-pseudotyped virus containing a GFP-coding pMXs retroviral vector. The chromosomal DNAs from GFP-positive cells were extracted with a DNeasy kit (Qiagen) and used as a PCR template with primers located in the pMXs vector cloning sites (MX-1S: 5'-GCATCGCAGCTTGGATACAC-3' and MX-1R: 5'-TATTTTATCGTCGACCACTGTGC-3'). The PCR products were directly sequenced (Fasmac Co., Ltd.).

**Detection of CTR1 expression by flow cytometry.** Cells were harvested with Enzyme Free Cell Dissociation Solution PBS Based (Sigma-Aldrich) and washed with PBS containing 0.5% bovine serum albumin (0.5% PBSA). Mouse anti-HA antibody conjugated with fluorescein isothiocyanate

(Miltenyi Biotec, Bergisch Gladbach, Germany) was used to detect CTR1. Cells were incubated with 0.5% PBSA containing antibody on ice for 15 min, then washed with 0.5% PBSA. Finally, cells were analyzed with a BD Accuri C6 flow cytometer (BD Biosciences, Franklin Lakes, NJ, USA).

**Detection of huCTR2 expression by RT-PCR.** Total RNA was extracted from cell lines using the RNeasy Mini Kit (Qiagen) and RNase-Free DNase Set (Qiagen). cDNA was synthesized using the PrimeScript II first-strand cDNA synthesis kit (Takara). PCR for detecting huCTR2 in cell lines was performed using KOD One PCR Master Mix Blue (Toyobo) and primers Myc-HuCTR2 F2 (5'-AAGCTGATCAGCGAGGAGG-3') and Myc-HuCTR2 R2 (5'-AACTTGGTTCAGCAGCTTGG-3'). Thermal cycling conditions were as follows: 30 cycles of 98°C for 10 s, 59.5°C for 5 s, and 68°C for 1 s. The PCR products were electrophoresed on a 1% agarose gel and stained with ethidium bromide.

**Immunoprecipitation and immunoblotting.** HEK293T cells were transfected with plasmids using TransIT<sup>®</sup>-293 reagent in six-well plates. The cell supernatants were collected 2 days after transfection. Cell supernatants were filtered through a 0.22- $\mu$ m filter and immunoprecipitated with anti-c-Myc monoclonal antibody agarose beads (Takara) at 4°C overnight. Sample Buffer Solution with Reducing Reagent (6x) (Nacalai Tesque, Kyoto, Japan) was added to the purified protein and heated at 100°C for 5 min. SDS-PAGE was performed with 10%–20% gels (Invitrogen) at 100 V for 2 h. Western blotting was performed with anti-c-Myc monoclonal antibody conjugated with horseradish peroxidase (FUJIFILM Wako Pure Chemical Corporation). LumiGLO<sup>®</sup> Reagent (20x) and 20x peroxide (Cell Signaling Technology, Danvers, MA, USA) were used as the substrate; blots were imaged using the Lumino Image Analyzer LAS2000 (Fujifilm, Minato city, Japan) or Amersham ImageQuant 800 (Cytiva, Shinjuku, Japan).

#### **Phylogenetic and sequence analyses.**

To identify primate ERV-related viruses, the amino acid sequence of CmRV1 was first used in a protein BLAST search of the NR- database (<https://blast.ncbi.nlm.nih.gov/Blast.cgi>). Next, nucleotide sequences were used to obtain their features via a BLAT search of UCSC primate genomes including chimpanzee (Clint\_PTRv2/panTro6), bonobo (Mhudiblu\_PPA\_v0/panPan3), crab-eating macaque (Macaca\_fascularis\_5.0/macFas5), rhesus macaque (Mul\_10/rheMac10), and gorilla (Kamilah\_GGO\_v0/gorGor6). The multiple sequence alignment (MSA) using gammaretroviral Env proteins was constructed by MAFFT (version 7.475) (13) with the option "--auto" (SI Fig. S7).

The MSA using ERV-DC nucleotide sequences (SI Fig. S1) was constructed by MAFFT with the option "--auto." MSAs using amino acid sequences of *gag*, *pol*, and *env* genes were constructed by MAFFT with the options "--add" and "--keeplength." Phylogenetic trees of *gag* and *pol* genes were constructed by the maximum likelihood method using IQTREE (version 1.6.12) (14). Substitution models were selected based on the BIC score provided by ModelFinder (15): TPM2+R3 for ERV-DCs (SI Fig. S1), JTTDCMut+F+G4 for *gag* genes (SI Fig. S10A), and LG+F+R4 for *pol* genes (SI Fig. S10B). The branch supportive values were measured using an ultrafast bootstrap method by UFBoot2 (16) with 1,000 replicates. The *env* phylogenetic tree was constructed based on the neighbor-joining method using the JTT model (17). Tree robustness was evaluated using the bootstrap method (1,000 replicates). The programs used to create the *env* tree (SI Fig. S10C) were implemented in MEGA X (18). Sequence accession numbers used for phylogenetic analyses are shown in Dataset S2. Tree visualization was performed by the ggtree package (version 2.2.1) (19).

**Estimation of the integration timings of primate truncated Envs and full-length Envs.** The integration timings of primate ERVs were estimated by the ortholog-dating method (20). First, *env* genes of CERV-related viruses were searched in the NCBI RefSeq genomic database (version: 20210511) by tBLASTn (version 2.5.0). Next, 10 kbp upstream and downstream genomic regions of CERV-like viral *env* genes were extracted by seqkit (version 0.15.0) (21); sequence similarities were compared by BLASTN (version 2.5.0) with the option "-evalue 1E-10." The presence/absence patterns of orthologous *env* loci were determined based on alignment coverage between flanked

sequences of *env* genes. The alignment coverage among orthologous ERVs was 99.87% (PNCr2-ChRV and PNCr2-BoRV), 92.38% (CmRV-trunc1 and RmRV-trunc1), and 86.61% (CmRV1\_2 and its ortholog in rhesus macaque) (SI Fig. S11). The sequence alignment of these orthologs was constructed by MAFFT (SI Figs. S12–S14). The species divergence time during primate evolution was determined using the Timetree database (22).

**Ethical approval.** Animal studies were conducted in accordance with the Guidelines for the Care and Use of Laboratory Animals of the Ministry of Education, Culture, Sports, Science and Technology, Japan. All experiments were approved by the Genetic Modification Safety Committee of Yamaguchi University, Yamaguchi, Japan.

**Data availability.** The relevant codes and data are available at [https://github.com/Junna-Kawasaki/Refrex\\_2021](https://github.com/Junna-Kawasaki/Refrex_2021). All other study data are included in the article and/or supporting information.

## SI References

1. Y. Anai *et al.*, Infectious Endogenous retroviruses in cats and emergence of recombinant viruses. *J. Virol.* **86**, 8634-8644 (2012).
2. K. Kuse *et al.*, Existence of two distinct infectious endogenous retroviruses in domestic cats and their different strategies for adaptation to transcriptional regulation. *J. Virol.* **90**, 9029-9045 (2016).
3. J. Ito *et al.*, Refrex-1, a soluble restriction factor against feline endogenous and exogenous retroviruses. *J. Virol.* **87**, 12029-12040 (2013).
4. R. Leinonen, H. Sugawara, M. Shumway, o. b. o. t. I. N. S. D. Collaboration, the sequence read archive. *Nucleic Acids Res.* **39**, D19-D21 (2010).
5. S. Chen, Y. Zhou, Y. Chen, J. Gu, fastp: an ultra-fast all-in-one FASTQ preprocessor. *Bioinformatics.* **34**, i884-i890 (2018).
6. A. Dobin *et al.*, STAR: ultrafast universal RNA-seq aligner. *Bioinformatics.* **29**, 15-21 (2012).
7. Y. Liao, G. K. Smyth, W. Shi, featureCounts: an efficient general purpose program for assigning sequence reads to genomic features. *Bioinformatics.* **30**, 923-930 (2013).
8. J. T. Robinson, H. Thorvaldsdóttir, A. M. Wenger, A. Zehir, J. P. Mesirov, Variant Review with the Integrative Genomics Viewer. *Cancer Res.* **77**, e31-e34 (2017).
9. A. Miyake *et al.*, Reduced folate carrier: an entry receptor for a novel feline leukemia virus variant. *J. Virol.* **93**, e00269-00219 (2019).
10. J. Ito, T. Baba, J. Kawasaki, K. Nishigaki, Ancestral mutations acquired in refrex-1, a restriction factor against feline retroviruses, during its cooption and domestication. *J. Virol.* **90**, 1470-1485 (2016).
11. S. J. Soll, S. J. D. Neil, P. D. Bieniasz, Identification of a receptor for an extinct virus. *Proc. Natl. Acad. Sci. U.S.A.* **107**, 19496-19501 (2010).
12. T. Kitamura, Y. Morikawa, "Isolation of T-Cell Antigens by Retrovirus-Mediated Expression Cloning" in T Cell Protocols. *Methods in Molecular Biology™*, K. P. Kearse, Ed. (Humana Press, Totowa, NJ, 2000), vol. 134, pp. 143-152.
13. K. Katoh, D. M. Standley, MAFFT Multiple sequence alignment software version 7: improvements in performance and usability. *Mol. Biol. Evol.* **30**, 772-780 (2013).
14. L.-T. Nguyen, H. A. Schmidt, A. von Haeseler, B. Q. Minh, IQ-TREE: A fast and effective stochastic algorithm for estimating maximum-likelihood phylogenies. *Mol. Biol. Evol.* **32**, 268-274 (2014).
15. S. Kalyanamoorthy, B. Q. Minh, T. K. F. Wong, A. von Haeseler, L. S. Jermini, ModelFinder: fast model selection for accurate phylogenetic estimates. *Nat. Methods.* **14**, 587-589 (2017).
16. D. T. Hoang, O. Chernomor, A. von Haeseler, B. Q. Minh, L. S. Vinh, UFBoot2: Improving the ultrafast bootstrap approximation. *Mol. Biol. Evol.* **35**, 518-522 (2017).
17. D. T. Jones, W. R. Taylor, J. M. Thornton, The rapid generation of mutation data matrices from protein sequences. *Comput. Appl. Biosci.* **8**, 275-282 (1992).
18. S. Kumar, G. Stecher, M. Li, C. Knyaz, K. Tamura, MEGA X: Molecular evolutionary genetics analysis across computing platforms. *Mol. Biol. Evol.* **35**, 1547-1549 (2018).
19. G. Yu, D. K. Smith, H. Zhu, Y. Guan, T. T.-Y. Lam, ggtree: an r package for visualization and annotation of phylogenetic trees with their covariates and other associated data. *Methods Ecol. Evol.* **8**, 28-36 (2017).
20. P. Aiewsakun, A. Katzourakis, Endogenous viruses: Connecting recent and ancient viral evolution. *Virology.* **479-480**, 26-37 (2015).
21. W. Shen, S. Le, Y. Li, F. Hu, SeqKit: A cross-platform and ultrafast toolkit for FASTA/Q file manipulation. *PLoS One.* **11**, e0163962 (2016).
22. S. Kumar, G. Stecher, M. Suleski, S. B. Hedges, TimeTree: A resource for timelines, timetrees, and divergence times. *Mol. Biol. Evol.* **34**, 1812-1819 (2017).



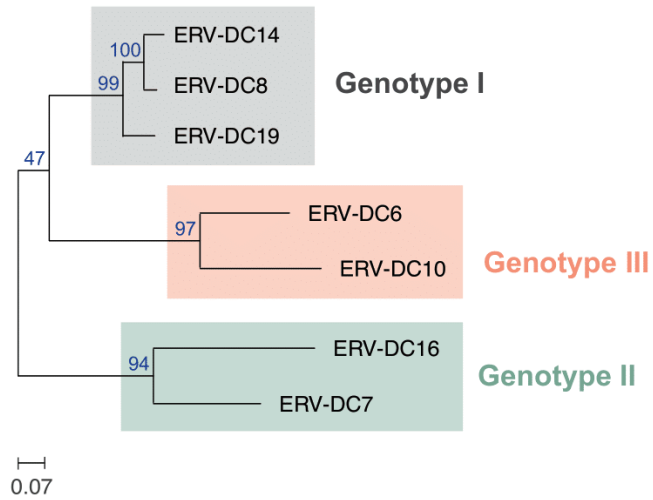

**Figure S1. ERV-DC genotypes.** The phylogenetic tree was constructed using nucleotide sequences of ERV-DCs based on the maximum likelihood method. Scale bars indicate the genetic distance (substitutions per site). The blue labels on branches indicate the bootstrap support values (%) with 1,000 replicates. The colored boxes highlight ERV-DC genotypes I (gray), II (green), and III (pink).



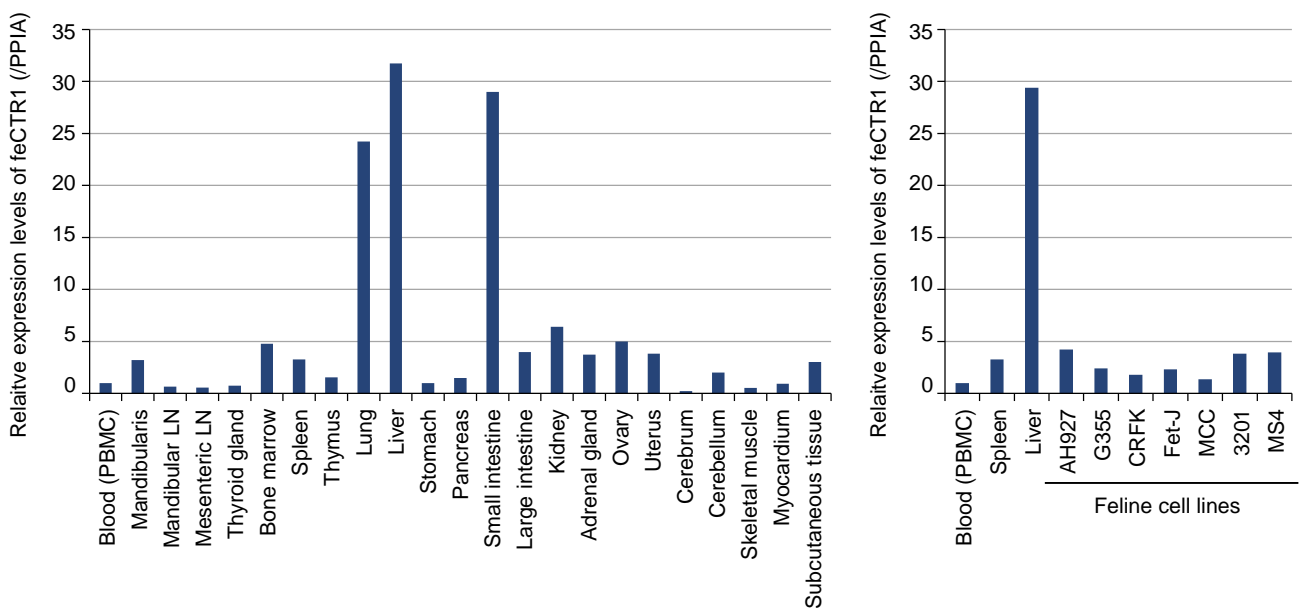

**Figure S3. CTR1 expression in feline tissues and cell lines.** Quantification of feline CTR1 transcripts by quantitative RT-PCR in feline tissues and feline cell lines. The y-axis indicates expression level normalized to the expression of peptidylprolyl isomerase A (PPIA). LN, Lymph node.

A

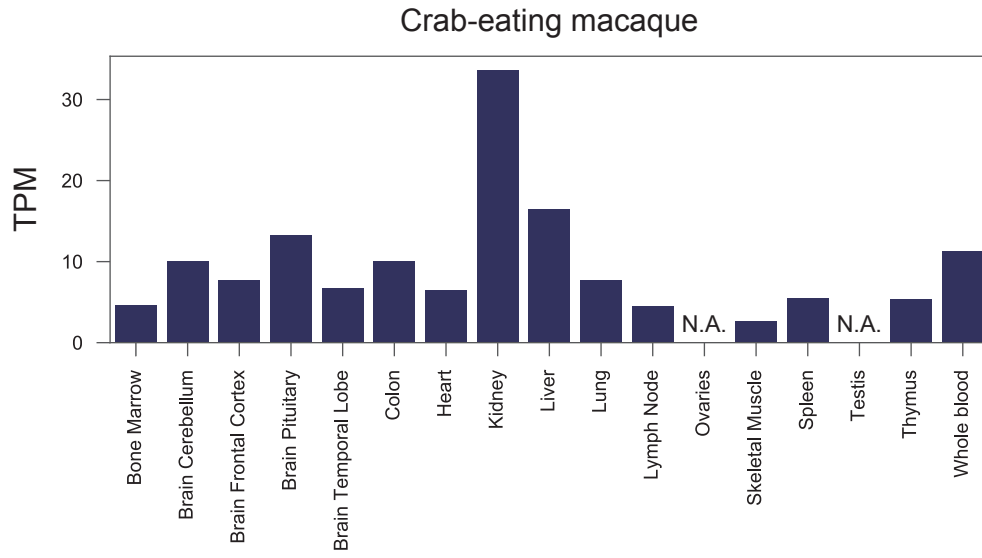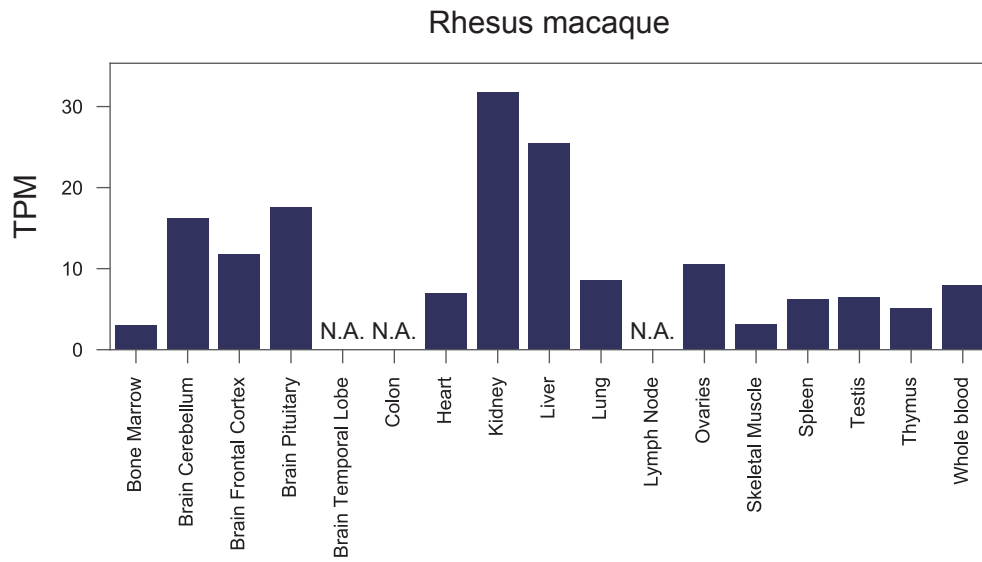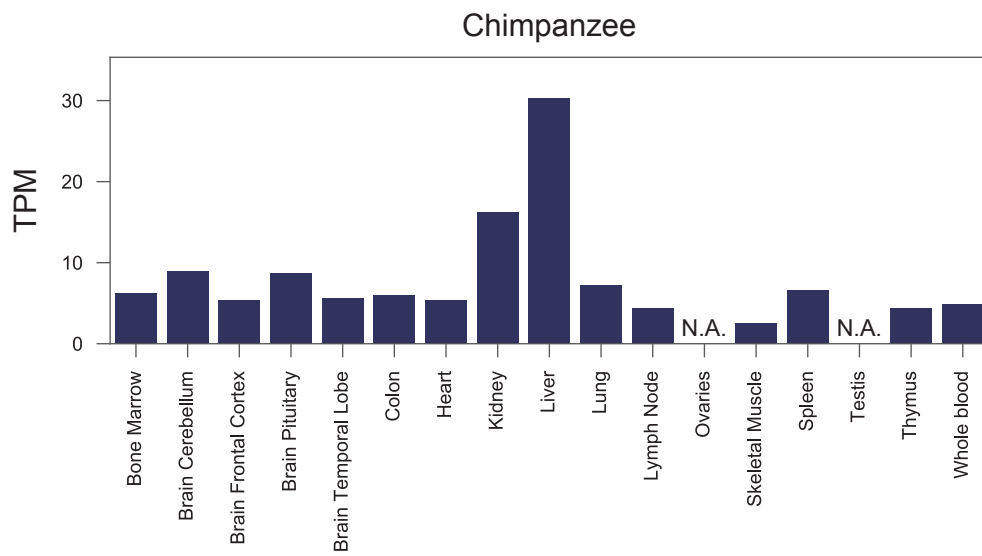

B

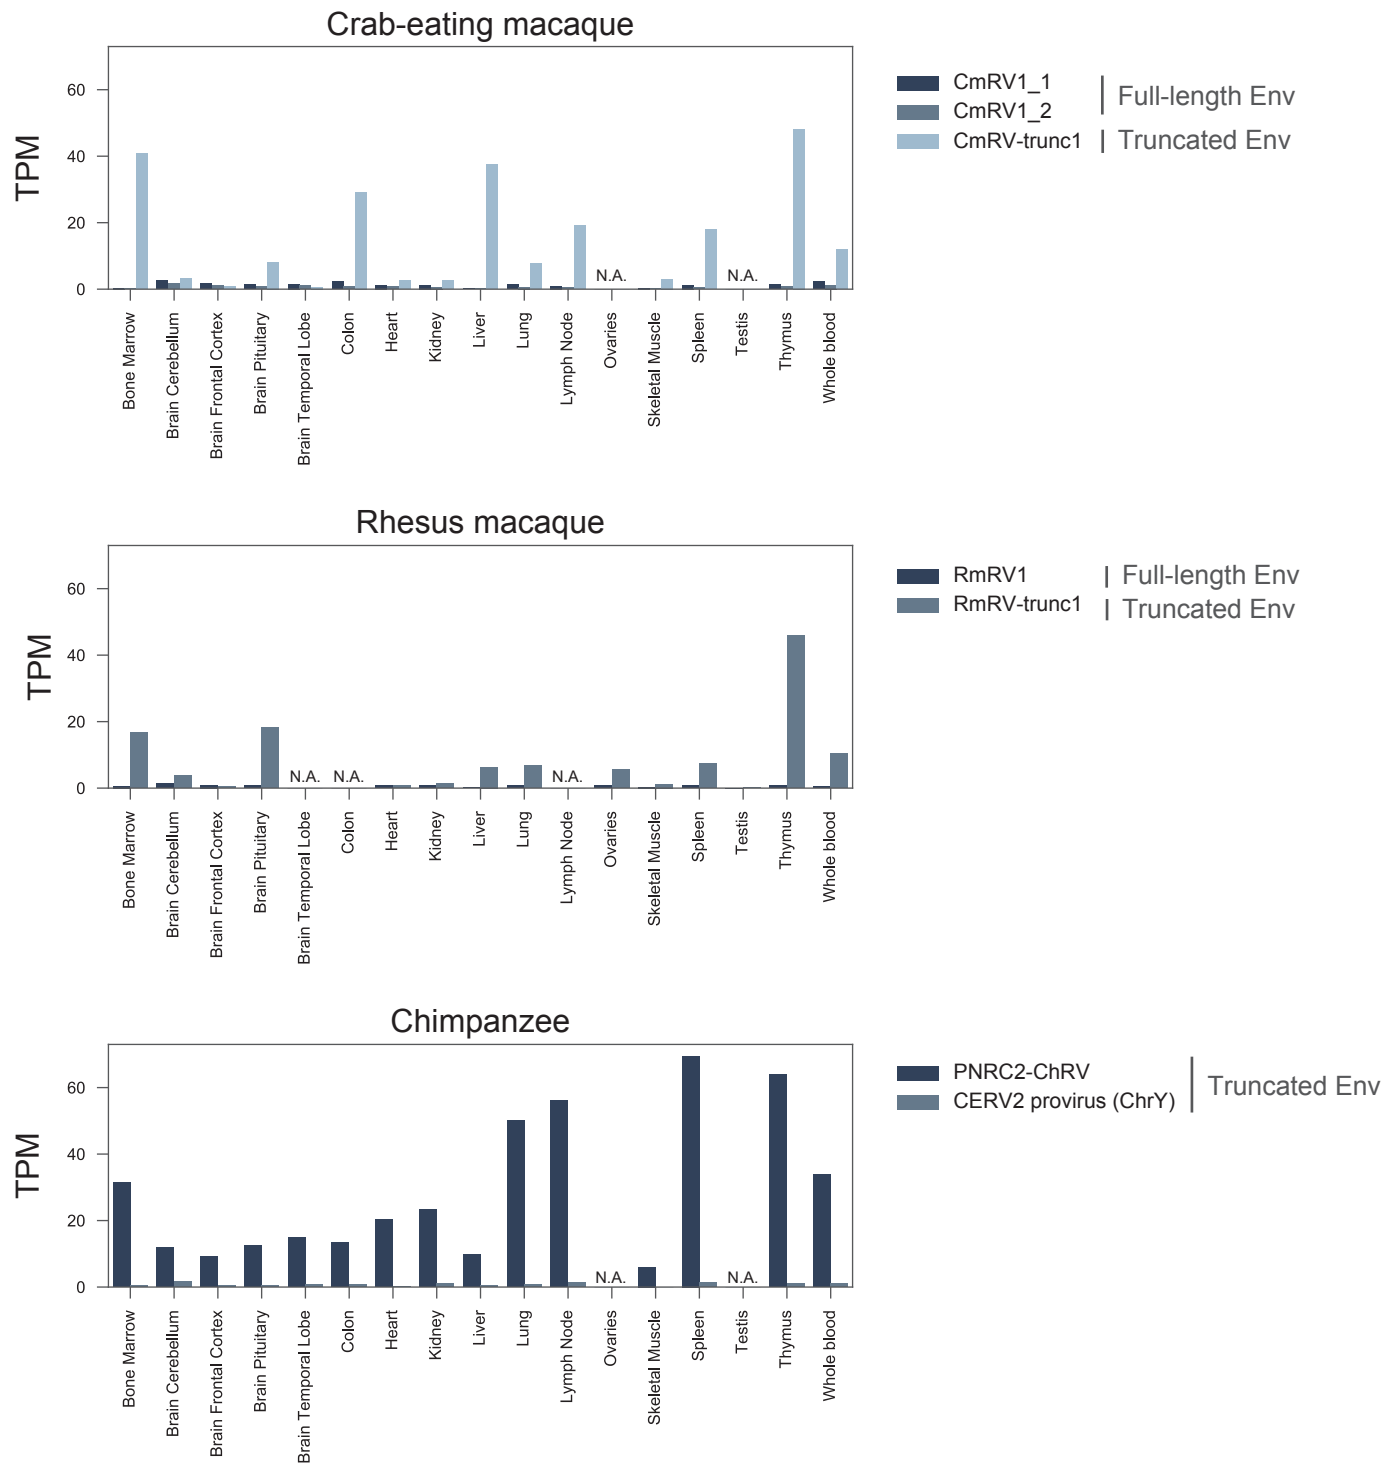

C

| Sample              |        | Quantification cycle (Cq) values |             |       |
|---------------------|--------|----------------------------------|-------------|-------|
|                     |        | CTR1                             | CmRV-trunc1 | GAPDH |
| Crab-eating macaque | Ovary  | 22.80                            | 25.05       | 17.17 |
|                     | Testis | 24.24                            | 26.62       | 17.57 |
| 293T cells          |        | 19.99                            | 0           | 13.43 |

**Figure S4. Expression of CTR1, and truncated and full-length *env* genes in primate tissues.** (A) CTR1 expression levels and (B) expression levels of truncated and full-length *env* genes were analyzed using publicly available RNA-seq data from crab-eating macaque (upper), rhesus macaque (middle), and chimpanzee (lower). The x-axis indicates tissues in which expression levels were investigated, and the y-axis indicates the normalized expression levels of CTR1 (A) and *env* genes (B), as transcripts per million (TPM). N.A.: expression level in the indicated tissue was not investigated because RNA-seq data were not available. (C) Expression of CTR1 and truncated *env* (CmRV-trunc1) was analyzed using cDNAs from ovary and testis from crab-eating macaque by quantitative RT-PCR (qRT-PCR). Quantification of glyceraldehyde 3-phosphate dehydrogenase (GAPDH) is also shown. 293T cells were used as a control. The data represent the quantification cycle (Cq) values.

|                    | Signal peptide |                                                                | → SU           |     |
|--------------------|----------------|----------------------------------------------------------------|----------------|-----|
| RmRV1 (chr11)      | 1              | MEPTTLRRPAQDKTLSYLAPCLLLALLPCVAGSNNPHRPYNLTWQVIDFSTHEVLDKTSK   |                | 60  |
| RmRV1 (KT330634.1) | 1              | .....                                                          |                | 60  |
| CmRV1 (KT330768.1) | 1              | .....                                                          |                | 60  |
| CmRV1 (KT330663.1) | 1              | .....                                                          |                | 60  |
| CmRV1_1 (chr13)    | 1              | .....G.....                                                    |                | 60  |
| CmRV1_2 (chr14)    | 1              | .....G.....D.....                                              |                | 60  |
|                    |                |                                                                | VRA            |     |
| RmRV1 (chr11)      | 61             | IAPMGTWFPDLYFNLDKIAKIDDMEGGEWRKQARRVSVSRNGFYACPGFRTGEMKKTCE    |                | 120 |
| RmRV1 (KT330634.1) | 61             | .....                                                          |                | 120 |
| CmRV1 (KT330768.1) | 61             | .....                                                          |                | 120 |
| CmRV1 (KT330663.1) | 61             | .....                                                          |                | 120 |
| CmRV1_1 (chr13)    | 61             | .....R.....                                                    |                | 120 |
| CmRV1_2 (chr14)    | 61             | .....R.....                                                    |                | 120 |
|                    |                |                                                                | VRB            |     |
| RmRV1 (chr11)      | 121            | IDALFCASWSCITTNDEGEWKWATKPWYITMSFVQRCRTRYSKTCNLVRIKFEDAASDN    |                | 180 |
| RmRV1 (KT330634.1) | 121            | .....                                                          |                | 180 |
| CmRV1 (KT330768.1) | 121            | .....                                                          |                | 180 |
| CmRV1 (KT330663.1) | 121            | .....                                                          |                | 180 |
| CmRV1_1 (chr13)    | 121            | .....                                                          |                | 180 |
| CmRV1_2 (chr14)    | 121            | .....C.....                                                    |                | 180 |
|                    |                |                                                                | PRR            |     |
| RmRV1 (chr11)      | 181            | RWISGLIWGLYLYQKPLYGIPIQIKLIVNPITAPVAVGPNQVLSETRKPLVPAPREPQPR   |                | 240 |
| RmRV1 (KT330634.1) | 181            | .....                                                          |                | 240 |
| CmRV1 (KT330768.1) | 181            | .....                                                          |                | 240 |
| CmRV1 (KT330663.1) | 181            | .....                                                          |                | 240 |
| CmRV1_1 (chr13)    | 181            | .....                                                          |                | 240 |
| CmRV1_2 (chr14)    | 181            | .....K.....                                                    |                | 240 |
|                    |                |                                                                | PRR ←          |     |
| RmRV1 (chr11)      | 241            | APKSTSPPLISTSSKYTPSAQVTVRGPNLIGIGDRLLNLKGSYFALNQTKEFTSSCWL     |                | 300 |
| RmRV1 (KT330634.1) | 241            | .....                                                          |                | 300 |
| CmRV1 (KT330768.1) | 241            | .....                                                          |                | 300 |
| CmRV1 (KT330663.1) | 241            | .....                                                          |                | 300 |
| CmRV1_1 (chr13)    | 241            | .....                                                          |                | 300 |
| CmRV1_2 (chr14)    | 241            | .....N.....D.....                                              |                | 300 |
|                    |                |                                                                |                |     |
| RmRV1 (chr11)      | 301            | CLATGPPYYEGIASTNNFTNSANPTGCWEQQRKLTLAEVSGSGTCIGQVPPSHQHLCNV    |                | 360 |
| RmRV1 (KT330634.1) | 301            | .....                                                          |                | 360 |
| CmRV1 (KT330768.1) | 301            | .....                                                          |                | 360 |
| CmRV1 (KT330663.1) | 301            | .....                                                          |                | 360 |
| CmRV1_1 (chr13)    | 301            | .....                                                          |                | 360 |
| CmRV1_2 (chr14)    | 301            | .....                                                          |                | 360 |
|                    |                |                                                                |                |     |
| RmRV1 (chr11)      | 361            | TLTPVSSNHLYLVPSETDWWACNTGLTPCISTAVFSSGTHYCVLVQVVPVRYVYHSGDSFDL |                | 420 |
| RmRV1 (KT330634.1) | 361            | .....                                                          |                | 420 |
| CmRV1 (KT330768.1) | 361            | .....                                                          |                | 420 |
| CmRV1 (KT330663.1) | 361            | .....                                                          |                | 420 |
| CmRV1_1 (chr13)    | 361            | .....                                                          |                | 420 |
| CmRV1_2 (chr14)    | 361            | .....V.....                                                    |                | 420 |
|                    |                |                                                                | SU ↔ TM        |     |
| RmRV1 (chr11)      | 421            | RYEQKTHTRPKREPISLTLAVMLGIGVAAGVGTGTAALVHGHHLQQLRVAIDEDLRAIE    |                | 480 |
| RmRV1 (KT330634.1) | 421            | .....                                                          |                | 480 |
| CmRV1 (KT330768.1) | 421            | .....                                                          |                | 480 |
| CmRV1 (KT330663.1) | 421            | .....                                                          |                | 480 |
| CmRV1_1 (chr13)    | 421            | .....                                                          |                | 480 |
| CmRV1_2 (chr14)    | 421            | .....                                                          |                | 480 |
|                    |                |                                                                |                |     |
| RmRV1 (chr11)      | 481            | QSITKLEESLTSLSEVVLQNRRLGLEIVFLKEGGLCAALKEQCCFYADHSGVVKDSMAKLR  |                | 540 |
| RmRV1 (KT330634.1) | 481            | .....                                                          |                | 540 |
| CmRV1 (KT330768.1) | 481            | .....                                                          |                | 540 |
| CmRV1 (KT330663.1) | 481            | .....                                                          |                | 540 |
| CmRV1_1 (chr13)    | 481            | .....                                                          |                | 540 |
| CmRV1_2 (chr14)    | 481            | .....                                                          |                | 540 |
|                    |                |                                                                |                |     |
| RmRV1 (chr11)      | 541            | ERLDKRKKERESQQNWFENWYNQSPWLSTLISTILGPLILLMLILTFGPCILNRLTLIK    |                | 600 |
| RmRV1 (KT330634.1) | 541            | .....                                                          |                | 600 |
| CmRV1 (KT330768.1) | 541            | .....                                                          |                | 600 |
| CmRV1 (KT330663.1) | 541            | .....                                                          |                | 600 |
| CmRV1_1 (chr13)    | 541            | .....T.....                                                    |                | 600 |
| CmRV1_2 (chr14)    | 541            | .....T.....                                                    |                | 600 |
|                    |                |                                                                | TM ↔ R peptide |     |
| RmRV1 (chr11)      | 601            | NRLNIVHAMVLTQQYQTLRTEEEAQD                                     |                | 626 |
| RmRV1 (KT330634.1) | 601            | .....                                                          |                | 626 |
| CmRV1 (KT330768.1) | 601            | .....                                                          |                | 626 |
| CmRV1 (KT330663.1) | 601            | .....                                                          |                | 626 |
| CmRV1_1 (chr13)    | 601            | .....                                                          |                | 626 |
| CmRV1_2 (chr14)    | 601            | .....                                                          |                | 626 |

**Figure S5. Predicted RmRV1, CmRV1, CmRV1\_1, and CmRV1\_2 Env proteins.** Primate ERV Env proteins from crab-eating macaque and rhesus macaque are shown using single-letter amino acid codes. The names of six ERV Envs are indicated with the gene accession number or chromosome number, as shown in SI Table S1. Dots, conserved amino acid residues. The CmRV1/RmRV1, CmRV1\_1, and CmRV1\_2 *env* genes encoding the indicated amino acids were DNA-synthesized. SU/TM and TM/R peptide boundaries and VRA/VRB/PRR were predicted based on homology with the RhERV2-A sequence (11). SU, surface unit; TM, transmembrane domain; VR, variable region; PRR, proline-rich region.



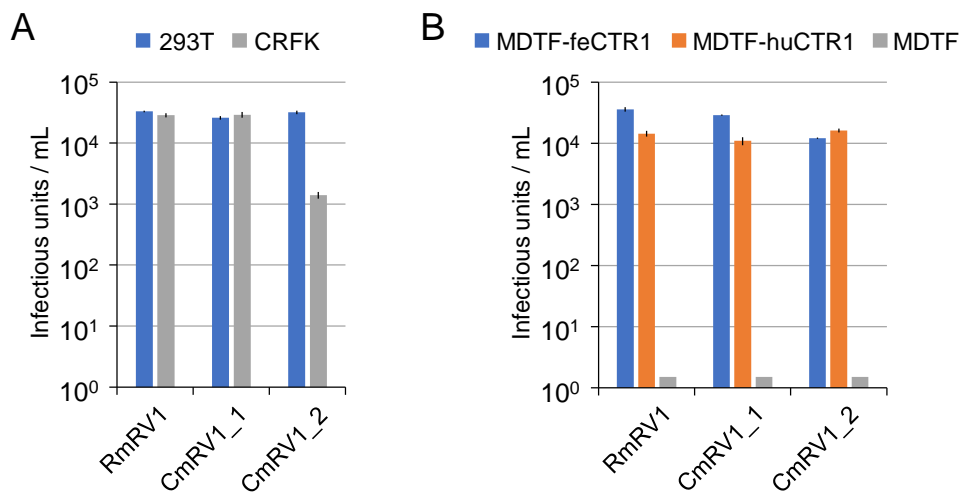

**Figure S6. Infectivity of primate CmRV1\_1, CmRV1\_2, and RmRV1 (CmRV1).** Infection of LacZ-coding primate Env-pseudotyped viruses in **(A)** HEK293T and CRFK cells and **(B)** MDTF-feCTR1, MDTF-huCTR1, and MDTF cells. The x-axis indicates the pseudotyped viruses and the y-axis indicates infectious units per milliliter of virus. Infective titers with standard deviations are means of three independent infection experiments.

|                         | Signal peptide | SU                                                                               |    |
|-------------------------|----------------|----------------------------------------------------------------------------------|----|
| FeLV-A                  | 1              | MESPTHPKPSKDKTLSWNLVFLV-GILFTIDIGMAN-----PSPHQIYNVTVITVQVINTQANATSM              | 63 |
| FeLV-B                  | 1              | .....V.....T...LV.G.K.....                                                       | 63 |
| FeLV-D (TY26)           | 1              | .....PAGMVFL.V.TS.GA..GAK---VKE-----GN...V.TL..Q.YS-.SGEVVWEVQGN                 | 54 |
| FeLV-D (ON-T)           | 1              | .....PAGMVFL.V.TS.GA..GAK---VKE-----GN...V.TL..Q.YS-.SGEVVWEVQGN                 | 54 |
| FeLV-D (ON-C)           | 1              | .....PAGMVFL.V.TS.GA..GAK---VKE-----GN...V.TL..Q.YS-.SGEVVWEVQGN                 | 52 |
| FeLV-D (44B)            | 1              | .....PAGMVFL.V.TS.GA..GAK---VKE-----GN...V.TL..Q.YS-.SGEVVWEVQGN                 | 54 |
| ERV-DC10                | 1              | .....R..ARMVFL.V.TS.GAEVGAR---AKE-----GN...V.TL..Q.YS-.SGEVVWEVQGN               | 54 |
| ERV-DC14                | 1              | .....PAGMVFL.V.TS.GA..GAK---VKE-----GN...V.TL..Q.YS-.SGEVVWEVQGN                 | 54 |
| ERV-DC7 (Refrex-1)      | 1              | .....PTGMVFL.A.TS.GA..GAKN---VGE-----GN...V.TL..QVYS-.SGEVVWEVQGN                | 54 |
| ERV-DC16 (Refrex-1)     | 1              | .....LPTGMIFL.A.TS.GA..GAKN---VVGK-----GN...V.TL..QVYS-.SGEVVWEVQGN              | 54 |
| RmRV1                   | 1              | ..T..LRR.AQ.....YLAPC.L--LAL-LPCVAGS-----NN..RP..L..QVIDFS.HEVLDK..KI            | 61 |
| CmRV1                   | 1              | ..T..LRR.AQ.....YLAPC.L--LAL-LPCVAGS-----NN..RP..L..QVIDFS.HEVLDK..KI            | 61 |
| CmRV1_1                 | 1              | ..T..LRG.AQ.....YLAPC.L--LAL-LPCVAGS-----NN..RP..L..QVIDFS.HEVLDK..KI            | 61 |
| CmRV1_2                 | 1              | ..T..LRG.AQ.....YLAPC.L--LAL-LPCVADS-----NN..RP..L..QVIDFS.HEVLDK..KI            | 61 |
| CERV2 (extinct)         | 1              | ..TSSLQG.PQ....PCLTPH.L--LALFLPWWIGS-----SN...P.RL..Q...FE.HEVL.E..HV            | 62 |
| RhERV2-A (extinct)      | 1              | ..T..LRG.AQ.....YLAPC.L--LAL-LPCVAGS-----NN..RP..L..QVIDFS.HEVLDK..KI            | 61 |
| CmRV-trunc1             | 1              | ..T..LQG.AQ.....YLTPC.L--LAL-LPCAAGSNNPRGHMKPPGYIFIDNN..RP..L..QVI.FNNHEVLGE..KI | 77 |
| RmRV-trunc1             | 1              | ..T..LQG.AQ.....YLTPC.L--LAL-LPCAAGSNNPRGHMKPPGYIFIDNN..RP..L..QVI.FNNHEVLGE..KI | 77 |
| PNRC2-ChrV              | 1              | ..TSSLQG.PQ...FPCLTPH.L--LTLFLPWWVGS-----SN...P.RL..Q...FK.HEVL.E..HV            | 62 |
| PNRC2-BoRV              | 1              | ..TSSLQG.PQ...FPCLTPH.L--LTLFLPWWVGS-----SN...P.RL..Q...FK.HEVL.E..HV            | 62 |
| BoRV-7                  | 1              | ..TSSLQG.PQ...RPLTPH.L--LALFLPWWIGS-----SN...P.RL..Q...FE.HEVL.E..HV             | 62 |
| CERV2 provirus (ChrY)   | 1              | ..TSSLQG.PQ...PCLTPH.L--LALFLPWWIGS-----SN...P.RL..Q...FE.HEVL.E..HI             | 62 |
| CERV2-trunc(artificial) | 1              | ..TSSLQG.PQ...PCLTPH.L--LALFLPWWIGS-----SN...P.RL..Q...FE.HEVL.E..HV             | 62 |
| GoRV-trunc1             | 1              | ..TSSLRG.PQ....PCLTPH.LTLALFLPWWVTG-----GN.Y.P.QL..QV..FE.HEVL.E..HV             | 64 |

SU

VRA

|                         |    |                                                                                     |     |
|-------------------------|----|-------------------------------------------------------------------------------------|-----|
| FeLV-A                  | 64 | GTLTDVYPTLHVLDLCLDVG--DTWEPIVLSPTNVKH---GARYPSSKYGCKTTDRKKQQQTYPFYFCVCPGHAPSLGPKGTH | 138 |
| FeLV-B                  | 64 | ....AF..MYF....II.--N..N.....SDQE.FPG...DQPM.RW..RNT.....-----NRKQ                  | 123 |
| FeLV-D (TY26)           | 55 | HA.NTWW.P.TP.F.Q.AAGL...DIPAR..K.LQSYMGERIQQMTAH..SSPTARCLQAQAE...RDNRD-RATAHR      | 133 |
| FeLV-D (ON-T)           | 55 | HA.NTWW.P.TP.F.Q.AAGL...DIPAR..K.LQSYMGERIQQMTAH..SSPTARCLQAQAE...RDNRD-RATAHR      | 133 |
| FeLV-D (ON-C)           | 53 | HA.NTWW.P.TP.F.Q.AAGL...DIPAR..E.LQSYMGERIQQMTAH..SSPTARCLQAQAE...RDNRD-RATAHR      | 131 |
| FeLV-D (44B)            | 55 | HA.NTWW.P.TP.F.Q.AAGL...DIP.R..K.LQSYMGERIQQMTAP..SSPTARCLQAQAE...RDNRD-RATAHR      | 133 |
| ERV-DC10                | 55 | HA.NTWW.P.TP.F.Q.AAGL...DIPDR..K.LETSME.TSQQLTPQ..SKPWKRCALAEERD...RDNRD-RATAHR     | 133 |
| ERV-DC14                | 55 | HA.NTWW.P.TP.F.Q.AAGL...DIPAR..K.LQSYMGERIQQMTAH..SSPTARCLQAQAE...RDNRD-RATAHR      | 133 |
| ERV-DC7 (Refrex-1)      | 55 | HA.NTWW.P.TP.F.Q.AAGL...DIPTR..KDLQSHMGERTQQMTAH..SSPTARCLQAQAE...RDNRD-RATAHR      | 133 |
| ERV-DC16 (Refrex-1)     | 55 | HA.NTWW.P.TP.F.Q.AAGL...DIPTR..KDLQSHMGERTQQMTAH..SSPTARCLQAQAE...RDNRD-RATAHR      | 133 |
| RmRV1                   | 62 | APMGTWF.D.YFN.DKIAK-----IDDMEGGEWRKQA.RVSVSRNG..A...-FRT-.EMKKT                     | 117 |
| CmRV1                   | 62 | APMGTWF.D.YFN.DKIAK-----IDDMEGGEWRKQA.RVSVSRNG..A...-FRT-.EMKKT                     | 117 |
| CmRV1_1                 | 62 | APMGTWF.D.YFN.DKIAK-----IDDMEGGEWRKQA.RVSVSRNG..A...-FRT-.EMRKT                     | 117 |
| CmRV1_2                 | 62 | APMGTWF.D.YFN.DKIAK-----IDDMEGGEWRKQA.RVSVSRNG..A...-FRT-.EMRKT                     | 117 |
| CERV2 (extinct)         | 63 | AP.NTWF.D.YFN.DKIAM-----IDEMEGGEWRKQA.RVLSRNG.....-FRT-.MKKT                        | 118 |
| RhERV2-A (extinct)      | 62 | APMGTWF.D.YFN.DKIAK-----IDDMEGGEWRKQA.RVSVSRNG..A...-FRT-.EMRKT                     | 117 |
| CmRV-trunc1             | 78 | APIGTWF.D.YFN.DKVA-----VNEMEGGEWRKQA.RVVISRNG..A...-FRT-.DMEKT                      | 133 |
| RmRV-trunc1             | 78 | APIGTWF.D.YFN.DKVA-----VNEMEGGEWRKQA.RVVISRNG..A...-FRT-.DMEKT                      | 133 |
| PNRC2-ChrV              | 63 | AP.NTWF.D.YFN.DKIAM-----IDEMEGGEWRKQA.RVLSRNG.....-FRT-.MKKT                        | 118 |
| PNRC2-BoRV              | 63 | AP.NTWF.D.YFN.DKIAM-----IDEMEGGEWRKQA.RVLSRNG.....-FRT-.MKKT                        | 118 |
| BoRV-7                  | 63 | AP.NTWF.D.YFN.DKIAM-----IDEMEGGEWRKQA.RVLSRNG.....-FRT-.MKKT                        | 118 |
| CERV2 provirus (ChrY)   | 63 | AP.NTWF.D.YFN.DKIAM-----INEMEGGEWRKQA.RVLSRNG.....-FRT-.MKKT                        | 118 |
| CERV2-trunc(artificial) | 63 | AP.NTWF.D.YFN.DKIAM-----IDEMEGGEWRKQA.RVLSRNG.....-FRT-.MKKT                        | 118 |
| GoRV-trunc1             | 65 | AP.NTWF.D.YFN.DQIAR-----INEMEGGEWRKQA.RVLSRNG..A...-FRT-.MKKT                       | 120 |

SU

VRB

|                         |     |                                                                              |     |
|-------------------------|-----|------------------------------------------------------------------------------|-----|
| FeLV-A                  | 139 | CGGAQDGFCAAWGCETTGEAWWPKSSSWDYITVKRGSSQD-NNCE-----GKCNPLILQFTQ               | 194 |
| FeLV-B                  | 124 | ...P.....V.....TY.R.T.....K.VT.GIYQ.SGGWCGPCYDKAVHSTTGASEG.R.....            | 203 |
| FeLV-D (TY26)           | 134 | ...YEEY..S.....D.Y.Q.T...L..IT..YTKP-DPDGHT----CYKKKGTEG-YHHWISPLSL..KIT..D  | 206 |
| FeLV-D (ON-T)           | 134 | ...YEEY..S.....D.Y.Q.T...L..IT..YTKP-DPDRHT----CYKKKGTEG-SHHWISPLSL..KIT..D  | 206 |
| FeLV-D (ON-C)           | 132 | ...YEEY..S.....D.Y.Q.T...L..IT..YTKP-DPDRHT----CYKKKGTEG-YHHWISPLSL..KIT..D  | 204 |
| FeLV-D (44B)            | 134 | ...YEEY..S.....D.Y.Q.T...L..IT..YTKP-DPGRYT----CYKKKGTEG-YHHWISPLSL..KIT..D  | 206 |
| ERV-DC10                | 134 | ...YEEY..S.....D.Y.R.T...L..IT..NYTKP-DS.DDR----VERKRKMS--RHWRDPLSL..KIT..D  | 204 |
| ERV-DC14                | 134 | ...YEEY..S.....D.Y.Q.T...L..IT..YTKP-DPDGHT----CYKKKGTEG-YHHWISPLSL..KIT..D  | 206 |
| ERV-DC7 (Refrex-1)      | 134 | ...YEEY..S.....D.Y.Q.T...L..IT..NYTKP-DPDGHT----CYKKKGTEG-YHWISPLSL..KIT..D  | 206 |
| ERV-DC16 (Refrex-1)     | 134 | ...YEEY..S.....D.Y.Q.T...L..IT..NYTKP-DPDGHT----CYKKKGTEG-YHHWISPLSL..KIT..D | 206 |
| RmRV1                   | 118 | ..EIDAL...S.S.I..NDGE..WATKPW...MS--FV.R-----C-----TRTRYSKT..LVRK.ED         | 174 |
| CmRV1                   | 118 | ..EIDAL...S.S.I..NDGE..WATKPW...MS--FV.R-----C-----TRTRYSKT..LVRK.ED         | 174 |
| CmRV1_1                 | 118 | ..EIDAL...S.S.I..NDGE..WATKPW...MS--FV.R-----C-----TRTRYSKT..LVRK.ED         | 174 |
| CmRV1_2                 | 118 | ..EIDAL...S.S.I..NDGE..WATKPW...MS--FV.C-----C-----TRTRYSKT..LVRK.ED         | 174 |
| CERV2 (extinct)         | 119 | ..EIMSLY..S.S.V..NDGE..WKTQPW.V.MS--YV.P-----C-----TRTRYSAT..LIRVK.EE        | 175 |
| RhERV2-A (extinct)      | 118 | ..EIDAL...S.S.I..NDGE..WATKPW...MS--FV.R-----C-----TRTRYSKT..LVRK.ED         | 174 |
| CmRV-trunc1             | 134 | ..DITHLY.YS.S.V..NDGE..WATKPW...MS--FV.P-----C-----TRTRYSKN..LVRK.ED         | 190 |
| RmRV-trunc1             | 134 | ..DITHLY.YS.S.V..NDGE..WATKPW...MS--FV.P-----C-----TRTRYSKN..LVRK.ED         | 190 |
| PNRC2-ChrV              | 119 | ..EIMSLY..S.S.V..NDGE..WKTQPW.L.MS--YV.P-----C-----TRTRYSAT..LIRVK.EE        | 175 |
| PNRC2-BoRV              | 119 | ..EIMSLY..S.S.V..NDGE..WKTQPW.L.MS--YV.P-----C-----TRTRYSAT..LIRVK.EE        | 175 |
| BoRV-7                  | 119 | ..EIMSLY..S.S.V..NDGE..WKTQPW.L.MS--YV.P-----C-----TRTRYSAT..LIRVK.EE        | 175 |
| CERV2 provirus (ChrY)   | 119 | ..EIMSLY..S.S.V..NDGE..WKTQPW.V.MS--YV.P-----C-----TRTRYSAT..LIRVK.EE        | 175 |
| CERV2-trunc(artificial) | 119 | ..EIMSLY..S.S.V..NDGE..WKTQPW.V.MS--YV.P-----C-----TRTRYSAT..LIRVK.EE        | 175 |
| GoRV-trunc1             | 121 | ..EITSLY..S.S.V..NDGES.WKTQPW.V.MT--YVRP-----C-----TRTRYSAT..LIRK.EE         | 177 |

## SU

## PRR

|                          |     |                                                                                |     |
|--------------------------|-----|--------------------------------------------------------------------------------|-----|
| FeLV-A                   | 195 | KGKQA-SWDGPKMWGLRLYRTGYDPIALFTVSRQVSTITPPQAMGNLVLDPQKPPSRQS--QTGSK-----        | 258 |
| FeLV-B                   | 204 | .R.T-.....S.....S.....S.....M.....-----IE.R-----                               | 267 |
| FeLV-D (TY26)            | 207 | S..R.LG.QTGYT...W.LP.K.RGIVLKIKLKID...--TV.....A...A.VQLAIPVQPPR-----          | 271 |
| FeLV-D (ON-T)            | 207 | S..R.LG.QTGYT...W.LP.K.RGIVLKIKLKID...--PV.....A...A.VQLAIPVQPPR-----          | 271 |
| FeLV-D (ON-C)            | 205 | S..R.LG.QTGYT...W.LP.K.RGVVLLKIKLKID...--PV.....A...A.VQLAIPVQPPR-----         | 269 |
| FeLV-D (44B)             | 207 | S..R.LG.QTGYT...W.LP.K.RGIVLKIKLKID...--TV.....A...A.VQLAIPVQPPR-----          | 271 |
| ERV-DC10                 | 205 | S..R.LG.QTGYT...W.LP.K.RGIIILKIKLKID...--TV.....A...A.VQLAIPVQPPR-----         | 269 |
| ERV-DC14                 | 207 | S..R.LG.QTGYT...W.LP.K.RGIVLKIKLKID...--TV.....A...A.VQLAIPVQPPR-----          | 271 |
| ERV-DC7 (Refrex-1)       | 207 | S..R.LG.QTGYT...W.LP.K.RGVVLLKIKLKID...--TV..T* 251                            |     |
| ERV-DC16 (Refrex-1)      | 207 | S..R.LG.QTGYT...W.LP.K.RGVVLLKIKLKID...--PV.....A...V.VQLAIPVQPP-----          | 271 |
| RmRV1                    | 175 | AA.SDNR.ISGLI...Y..QKPL-YGIIPIQIKLI.NP..A.V.V...Q..SETRK.LVPAPREPQPR-----      | 240 |
| CmRV1                    | 175 | AA.SDNR.ISGLI...Y..QKPL-YGIIPIQIKLI.NP..A.V.V...Q..SETRK.LVPAPREPQPR-----      | 240 |
| CmRV1_1                  | 175 | AA.SDNR.ISGLI...Y..QKPL-YGIIPIQIKLI.NP..A.V.V...Q..SETRK.LVPAPREPQPR-----      | 240 |
| CmRV1_2                  | 175 | AA.SDNR.ISGLI...Y..QKPL-YGIIPIQIKLI.NP..A.V.V...Q..SKTRK.LVPAPREPQPR-----      | 240 |
| CERV2 (extinct)          | 176 | AA.TDPR.TTGLI...N..Q.PA-SGLPIQIRLL.NPVSASVPV...P..TGRA.SQSG.RQKVPTGAQSPVAKPPTS | 254 |
| RhERV2-A (extinct)       | 175 | AA.SDNR.ISGLI...Y..QKPL-YGIIPIQIKLI.NP..A.V.V...Q..SETRK.LVPAPREPQPR-----      | 240 |
| CmRV-trunc1              | 191 | AA.SDN..ITGLI...Y..QKPL-YGIIPIQIRLL.DPDIA.V.V.L.Q..SEE.K.PVPIPEKQPQ-----       | 256 |
| RmRV-trunc1              | 191 | AA.SDN..ITGLI...Y..QKPL-YGIIPIQIRLL.DPDIA.V.V.L.Q..SEE.K.PVPIPEKQPQ-----       | 256 |
| PNRC2-ChrV               | 176 | AA.TDPR.TTGLI...N..Q.PA-AGLPIQIRLL.NPVSASVPV...P..TGRA.SQ* 231                 |     |
| PNRC2-BoRV               | 176 | AA.TDPR.TTGLI...N..Q.PA-AGLPIQIRLL.NPVSASVPV...P..TGRA.SQ* 231                 |     |
| BoRV-7                   | 176 | AA.TDPR.TTGLI...N..Q.PA-SGLPIQIRLL.NPVSASVPV...P..TGRA.S* 230                  |     |
| CERV2 provirus (ChrY)    | 176 | AA.TDPR.TTGLI* 188                                                             |     |
| CERV2-trunc (artificial) | 176 | AA.TDPR.TTGLI* 188                                                             |     |
| GoRV-trunc1              | 178 | AA.TDSR.TSGLI...N..Q.PA-FGPIQIKLI.NPASA.VPI...Q..TGKA...SR.RQKVPTA-----        | 243 |

## SU

## PRR

|                     |     |                                                                  |     |
|---------------------|-----|------------------------------------------------------------------|-----|
| FeLV-A              | 259 | -----VATQRPTNESAP-----RSVAP-----T-----TVGPKRIGTGDRLLINLVQGT      | 297 |
| FeLV-B              | 268 | -----TPHHS.G.GGT.GITLVNA.I..LSTPV-----PAS.....                   | 317 |
| FeLV-D (TY26)       | 272 | -----AP.....-T.GINPVNSTLS.SLGYF-----P.S.P.....L.....V            | 312 |
| FeLV-D (ON-T)       | 272 | -----AP.....-T.GINPVNSTLS.SLGYF-----P.S.P.....L.....V            | 312 |
| FeLV-D (ON-C)       | 270 | -----AP.....-T.GINPVNSTLS.SLGYF-----P.S.P.....L.....V            | 310 |
| FeLV-D (44B)        | 272 | -----AP.....-T.GINPVNSTLS.SLGYF.P-----P.S.P.....L.....RV         | 313 |
| ERV-DC10            | 270 | -----AP.....-T.RVNPVNSTPS.SLGYFAPAPGPRPPYPTS.S.P.....L.....V     | 321 |
| ERV-DC14            | 272 | -----AP.....-T.GINPVNSTLS.SLGYF-----P.S.P.....L.....V            | 312 |
| ERV-DC16 (Refrex-1) | 272 | -----AP.....-T.RVSPANSTLS.NLGS-----S.* 297                       |     |
| RmRV1               | 241 | -----APKS-----TS.PLISTSSKYT.SAQT.V.R-----LNL.I.....L..IK.S       | 283 |
| CmRV1               | 241 | -----APKS-----TS.PLISTSSKYT.SAQT.V.R-----LNL.I.....L..IK.S       | 283 |
| CmRV1_1             | 241 | -----APKS-----TS.PLISTSSKYT.SAQT.V.R-----LNL.I.....L..IK.S       | 283 |
| CmRV1_2             | 241 | -----APKS-----TS.PLISTSSKYT.SAQN.V.R-----LDL.I.....L..IK.S       | 283 |
| CERV2 (extinct)     | 255 | PSQSGDSVITGKAPPQSGSPSPPPP-----TS.SALPGTTRLP.DPET-----SN..F..IR.A | 308 |
| RhERV2-A (extinct)  | 241 | -----APKS-----TS.PLISTSSKYT.SAQN.V.R-----LDL.I.....L..IK.S       | 283 |
| CmRV-trunc1         | 257 | -----APQS-----TS.PLISTSSEYTSSAQN.V.* 281                         |     |
| RmRV-trunc1         | 257 | -----APQS-----TS.PLISTSSEYTSSAQN.V.* 281                         |     |
| GoRV-trunc1         | 244 | -----APPT-----S.SALPGTTLPL.DPET-----SN..FH..IR.A                 | 276 |

## SU

|                    |     |                                                                                   |     |
|--------------------|-----|-----------------------------------------------------------------------------------|-----|
| FeLV-A             | 298 | YLALNATDPNKTKDCWLCLVSRPPYYEGIAILGNYSNQTNPSPSCLSIPOHKLITISEVSGQGLCIGTVPKTHQALCNKTQ | 377 |
| FeLV-B             | 318 | .....R.....E.....                                                                 | 397 |
| FeLV-D (TY26)      | 313 | .T..L.A.SQ.Q.....TAK...Q.V..I..FT.H.A.LR.STT.R.G..LT..T.H.....KI.PS..N..SQ.I      | 392 |
| FeLV-D (ON-T)      | 313 | .T..L.A.SQ.Q.....TAK...Q.V..I..FT.H.A.LR.STT.R.G..LT..T.H.....KI.PS..N..SQ.I      | 392 |
| FeLV-D (ON-C)      | 311 | .T..L.A.Q.Q.....TAK...Q.V..I..FT.H.A.LR.STT.R.G..LT..T.H.....KI.PS..N..SQ.I       | 390 |
| FeLV-D (44B)       | 314 | .T..L.A.Q.Q.....TAK...Q.V..I..FT.H.A.LR.STT.R.G..LT..T.H.....KI.PS..N..SQ.I       | 393 |
| ERV-DC10           | 322 | .T..L.T..Q.Q.....TAK...Q.V..I..FT.H.A.LR.STT.R.G..LT..T.H.....KI.PS..N..SQ.I      | 401 |
| ERV-DC14           | 313 | .T..L.A.Q.Q.....TAK...Q.V..I..FT.H.A.LR.STT.R.G..LT..T.H.....KI.PS..N..SQ.I       | 392 |
| RmRV1              | 284 | F...Q.K.EF.SS....ATG.....STN.FT.SA.-TG.AWEQ.R...LA...S.T...Q..PS.H...V.L          | 362 |
| CmRV1              | 284 | F...Q.K.EF.SS....ATG.....STN.FT.SA.-TG.AWEQ.R...LA...S.T...Q..PS.H...V.L          | 362 |
| CmRV1_1            | 284 | F...Q.K.EF.SS....ATG.....STN.FT.SA.-TG.AWEQ.R...LA...S.T...Q..PS.H...V.L          | 362 |
| CmRV1_2            | 284 | F...Q.K.EF.SS....ATG.....STN.FT.SA.-TG.AWEQ.R...LA...S.T...Q..PS.H...V.L          | 362 |
| CERV2 (extinct)    | 309 | ...Q.R.ES.TS...A.S.....SIS.FT.S.S-HSG.AWDQHK...LA...S.T...R..PS.H...R.L           | 387 |
| RhERV2-A (extinct) | 284 | F...Q.K.EF.SS....ATG.....STN.FT.SA.-TG.AWEQ.R...LA...S.T...Q..PS.H...V.L          | 362 |
| GoRV-trunc1        | 277 | ...Q.K.ES.AS....ATG.....SVS.FT.S.-HSG.AWERHK...LS...S.T...K..PS.H...V.L           | 355 |

## SU

## TM

|                    |     |                                                                                  |     |
|--------------------|-----|----------------------------------------------------------------------------------|-----|
| FeLV-A             | 378 | QG-HTGAHYLAAPNGTYWACNTGLTPCISMAV--LNWTSDFCVLIELWPRVYHQPEVYVYTHFAKA--VRFREPRISLTV | 452 |
| FeLV-B             | 398 | .....-A.....                                                                     | 472 |
| FeLV-D (TY26)      | 393 | PSVGQ.PY..T.....V.....LQ--..N.A.Y.I.....KIF..DS..I.G.YEPG-G.....V....            | 468 |
| FeLV-D (ON-T)      | 393 | PSVGQ.PY..T.....V.....LQ--F.N.A.Y.I.....IF..DS..I.G.YEPG-G.....V....             | 468 |
| FeLV-D (ON-C)      | 391 | PSVGQ.PY..T.....V.....LQ--..N.A.Y.I.....KIF..DS..I.G.YEPG-G.....V....            | 466 |
| FeLV-D (44B)       | 394 | PSVGQ.PY..T.....V.....LQ--..N.A.Y.I.....KIF..DS..I.G.YEPG-G.....V....            | 469 |
| ERV-DC10           | 402 | PSVGQ.PY..T.....V.....LQI--..D.A.Y.I.....KIF..DS..I.G.YELG-G.....D.V....         | 477 |
| ERV-DC14           | 393 | PSVGQ.PY..T.....V.....LQ--..N.A.Y.I.....KIF..DS..I.G.YEPG-G.....V....            | 468 |
| RmRV1              | 363 | TV-PSSN...VPSETDW.....T.....-FSSGTHY..VQVV...Y..SGDSFDLRYEQKTHT.PK.....L         | 439 |
| CmRV1              | 363 | TV-PSSN...VPSETDW.....T.....-FSSGTHY..VQVV...Y..SGDSFDLRYEQKTHT.PK.....L         | 439 |
| CmRV1_1            | 363 | TV-PSSN...VPSETDW.....T.....-FSSGTHY..VQVV...Y..SGDSFDLRYEQKTHT.PK.....L         | 439 |
| CmRV1_2            | 363 | TV-PSSN...VPSETDW.....V.T.-FSSGTHY..VQVV...Y..SGDSFDLRYEQKTHT.PK.....L           | 439 |
| CERV2 (extinct)    | 388 | AV-PRTS...IPSGPDW...K.....V.T.-F.NSE.Y.I.VQVV...Y.QTG.SFESQ.EQKYLT.MK...V...L    | 464 |
| RhERV2-A (extinct) | 363 | TV-PSSN...VPSETDW.....V.T.-FSSGTHY..VQVV...Y..SGDSFDLRYEQKTHT.PK.....L           | 439 |
| GoRV-trunc1        | 356 | TV-PSTS...IPSGTDW...D.....LPL.YPQ.SS.T----VKIIVHCY-----                          | 401 |



**A**

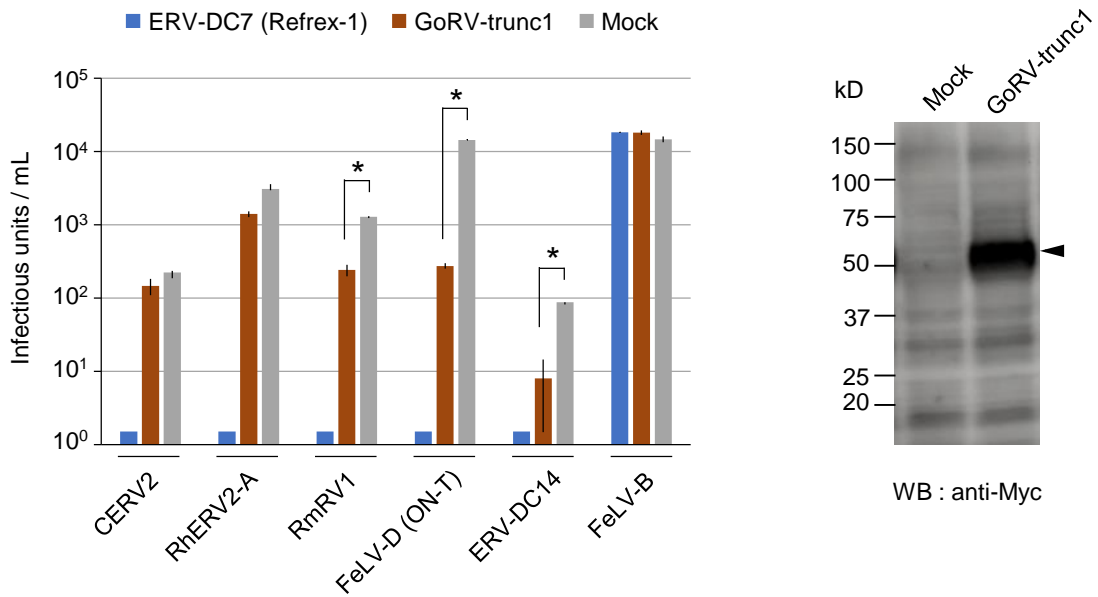

**B**

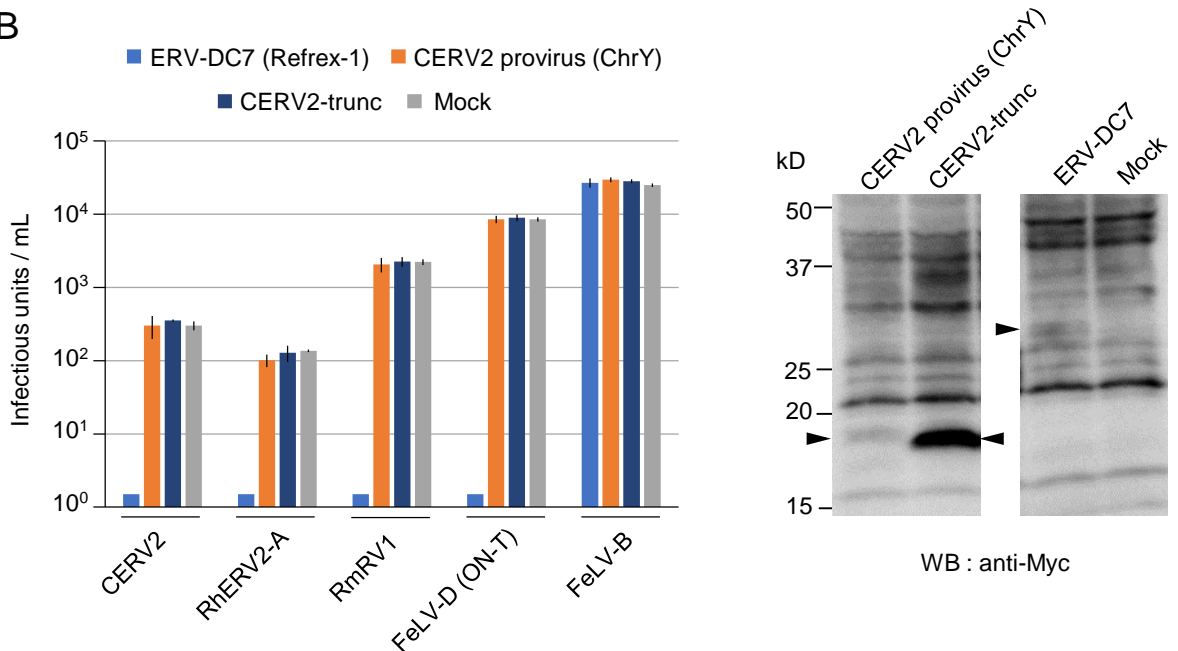

**Figure S8. Inhibitory effect of GoRV-trunc1, CERV2 provirus (ChrY), and CERV2-trunc against retroviral infection.** (A) HEK293T cells were transfected with expression vectors encoding GoRV-trunc1, ERV-DC7 (Refrex-1), or empty vector (Mock) (A, left side). (B) HEK293T cells were transfected with expression vectors encoding ERV-DC7 (Refrex-1), CERV2 provirus (ChrY; Chromosome Y), CERV2-trunc (constructed from CERV2 Env), or empty vector (Mock) (B, left side); cells were then infected with Env-pseudotyped viruses indicated on the x-axis. The y-axis indicates infectious units per milliliter of supernatant. Infection titers are means of three infection experiments. Differences between groups were assessed using Student's t-test (\*,  $p < 0.01$ ). Bars represent standard deviations. Western blotting (WB) with anti-c-Myc antibody of cell lysates from HEK293T cells transfected with the indicated plasmids. Arrows shown in the figure indicate specific bands (A and B, right side).

# Crab-eating macaque (Thymus: SRR1758961)

## CmRV1\_1 [Chr 13: 2,007,224-2,019,238]

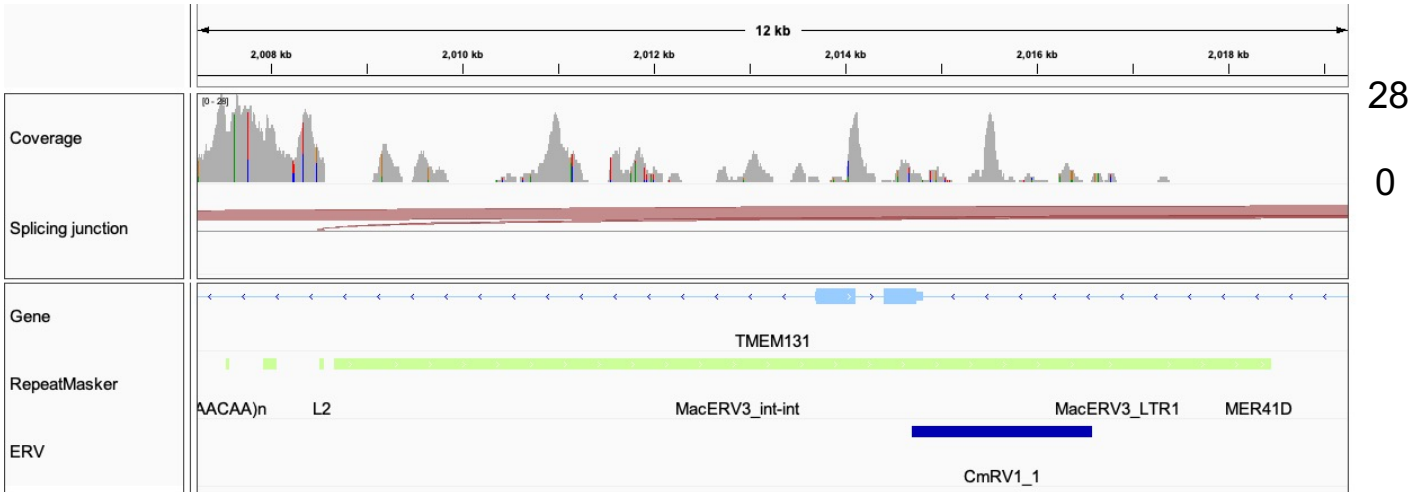

## CmRV1\_2 [Chr 14: 109,891,789-109,903,426]

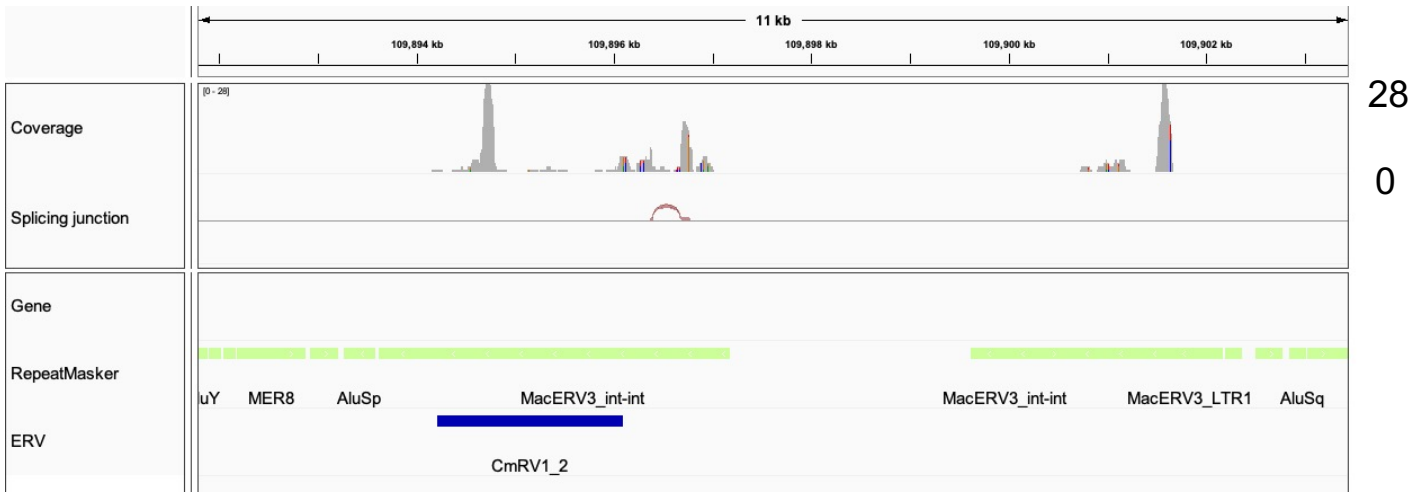

## CmRV-trunc1 [Chr 1: 104,256,885-104,275,785]

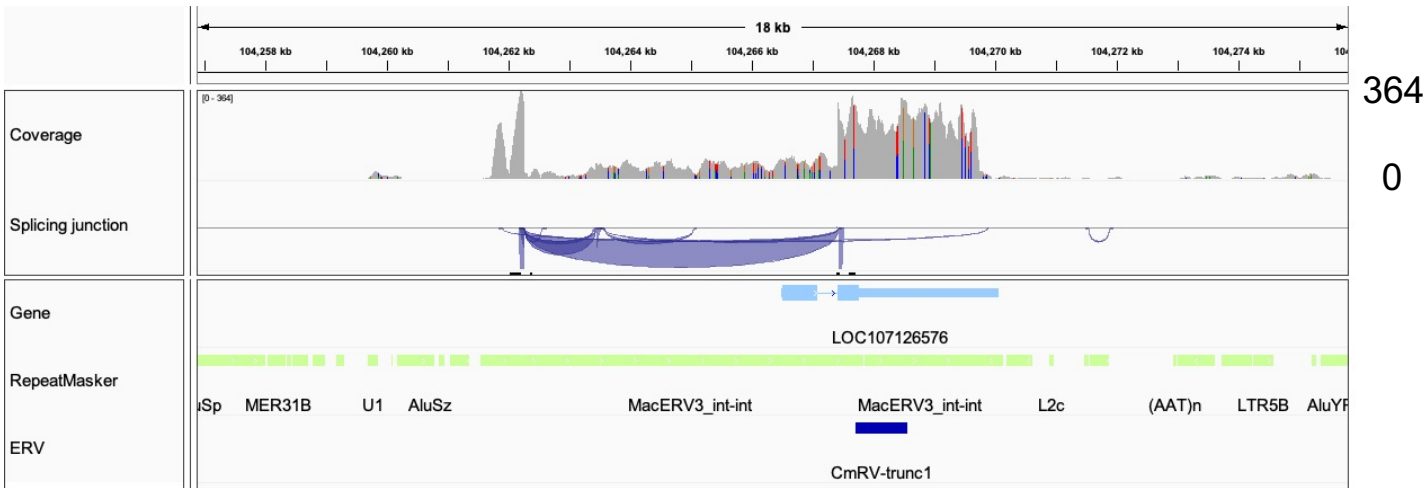

# Rhesus macaque (Thymus: SRR1602572)

## RmRV1 [Chr 11:104,716,721-104,727,782]

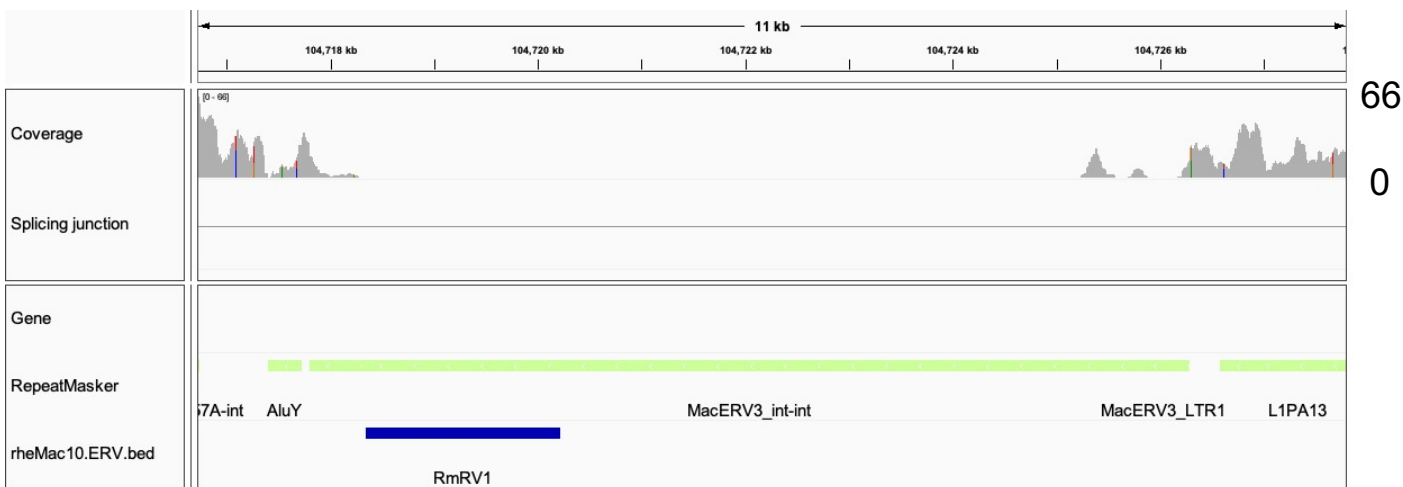

## RmRV-trunc1 [Chr 1: 103,211,574-103,231,480]

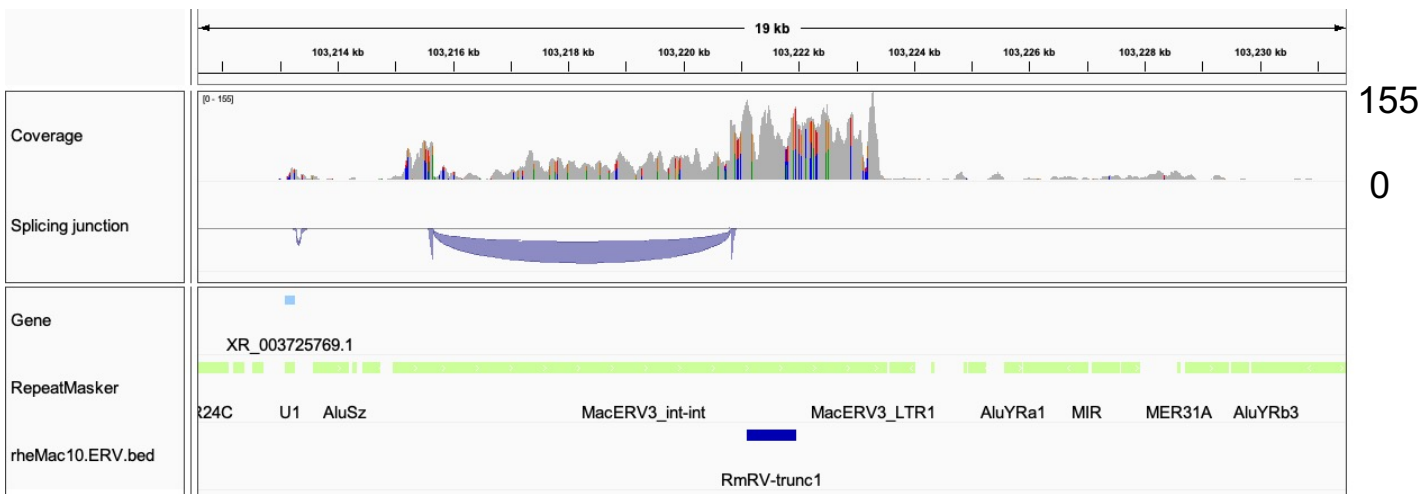

# Chimpanzee (Thymus: SRR1758933)

## PNRC2-ChRV [Chr 1: 22,527,643-22,546,267]

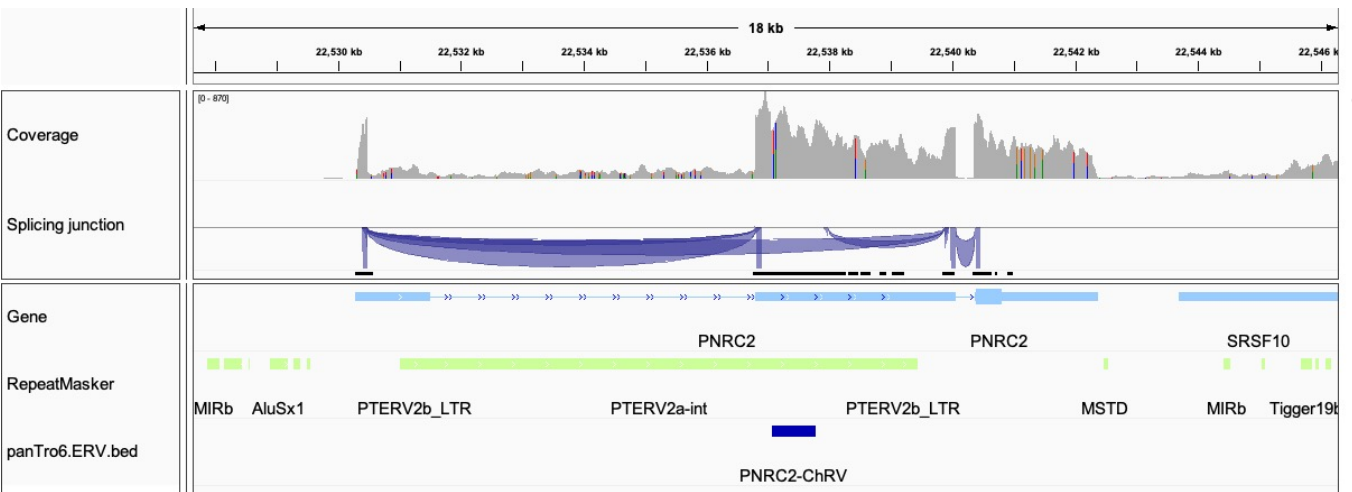

## CERV2 provirus (ChrY) [Chr Y: 20,220,009-20,230,217]

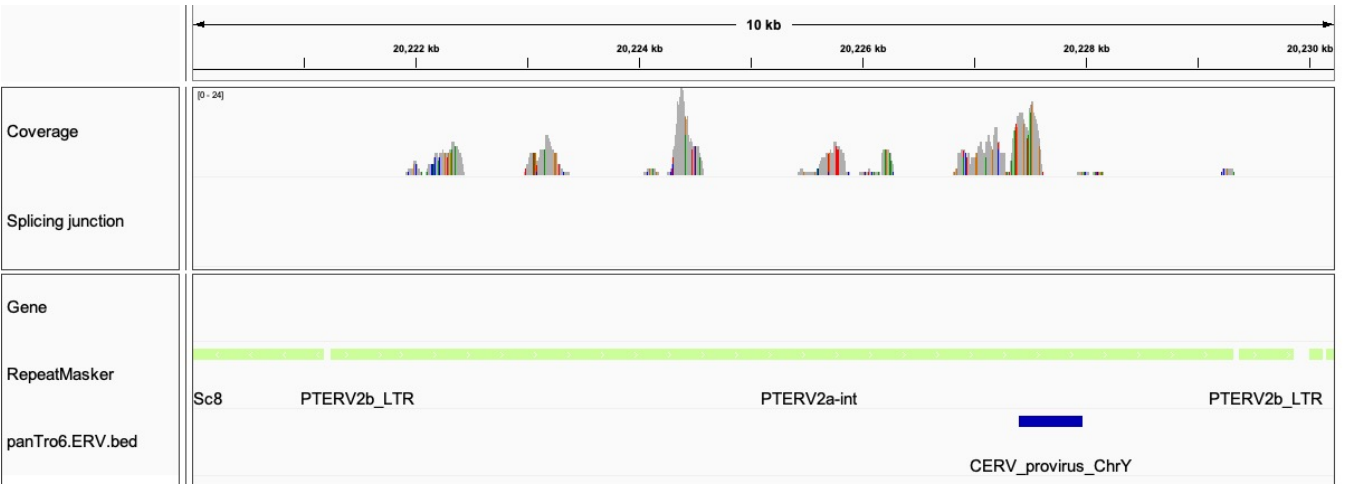



**Figure S9. The mapped pattern of RNA-seq reads to genomic regions encoding truncated [CmRV-trunc1, RmRV-trunc1, PNRC2-ChRV, and CERV2 provirus (ChY)] and full-length Env (CmRV1\_1 and RmRV1\_2) proteins.** Each panel shows mapped patterns in the thymus data of crab-eating macaque (SRR1758961), rhesus macaque (SRR1602572), and chimpanzee (SRR1758933). The annotations of host genes (light blue), repetitive elements defined by RepeatMasker (light green), and primate *env* genes (blue) are shown. The number shown to the right of the coverage column indicates the range of RNA-seq read counts. Expression of truncated *env* genes (CmRV-trunc1, RmRV-trunc1, and PNRC2-ChRV) is found as spliced transcripts.

**A**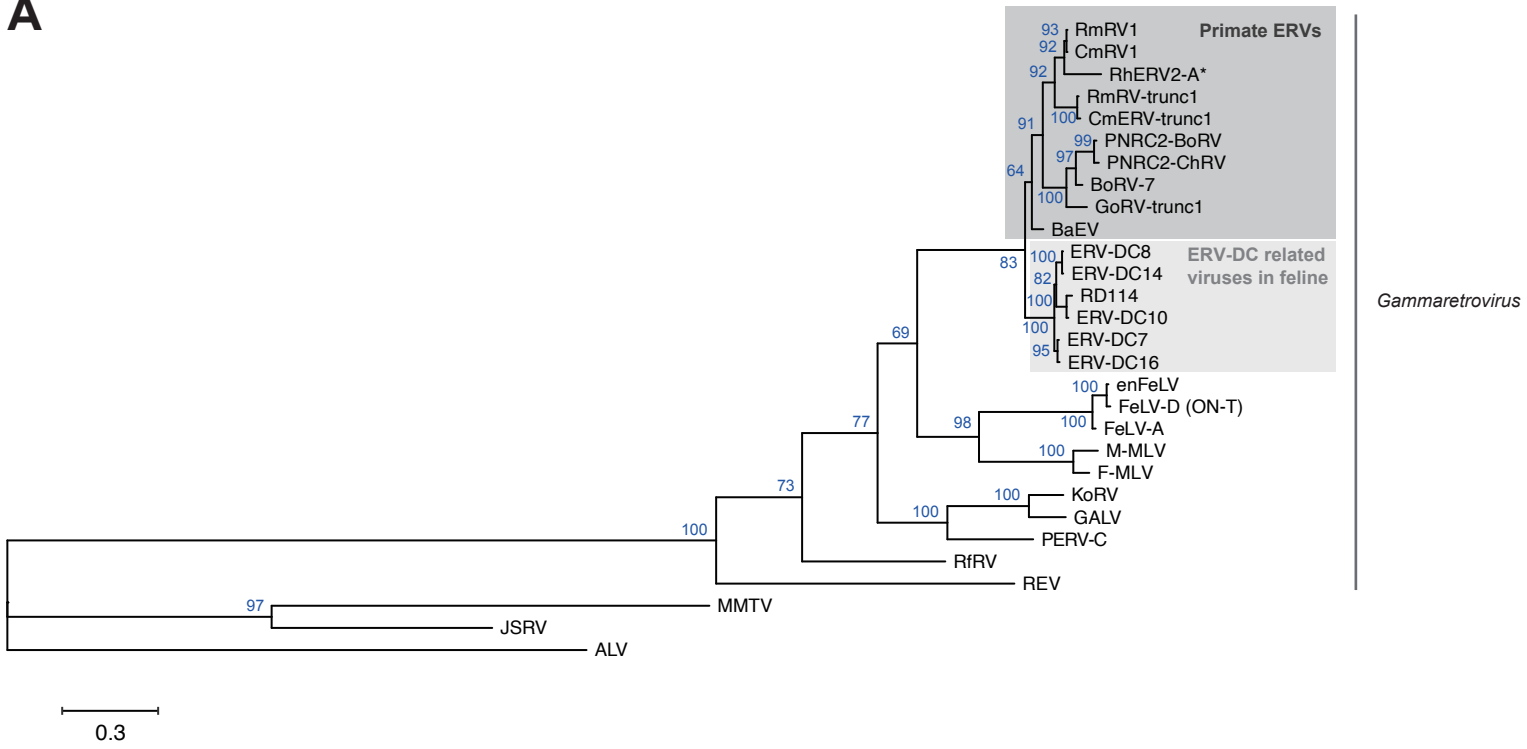**B**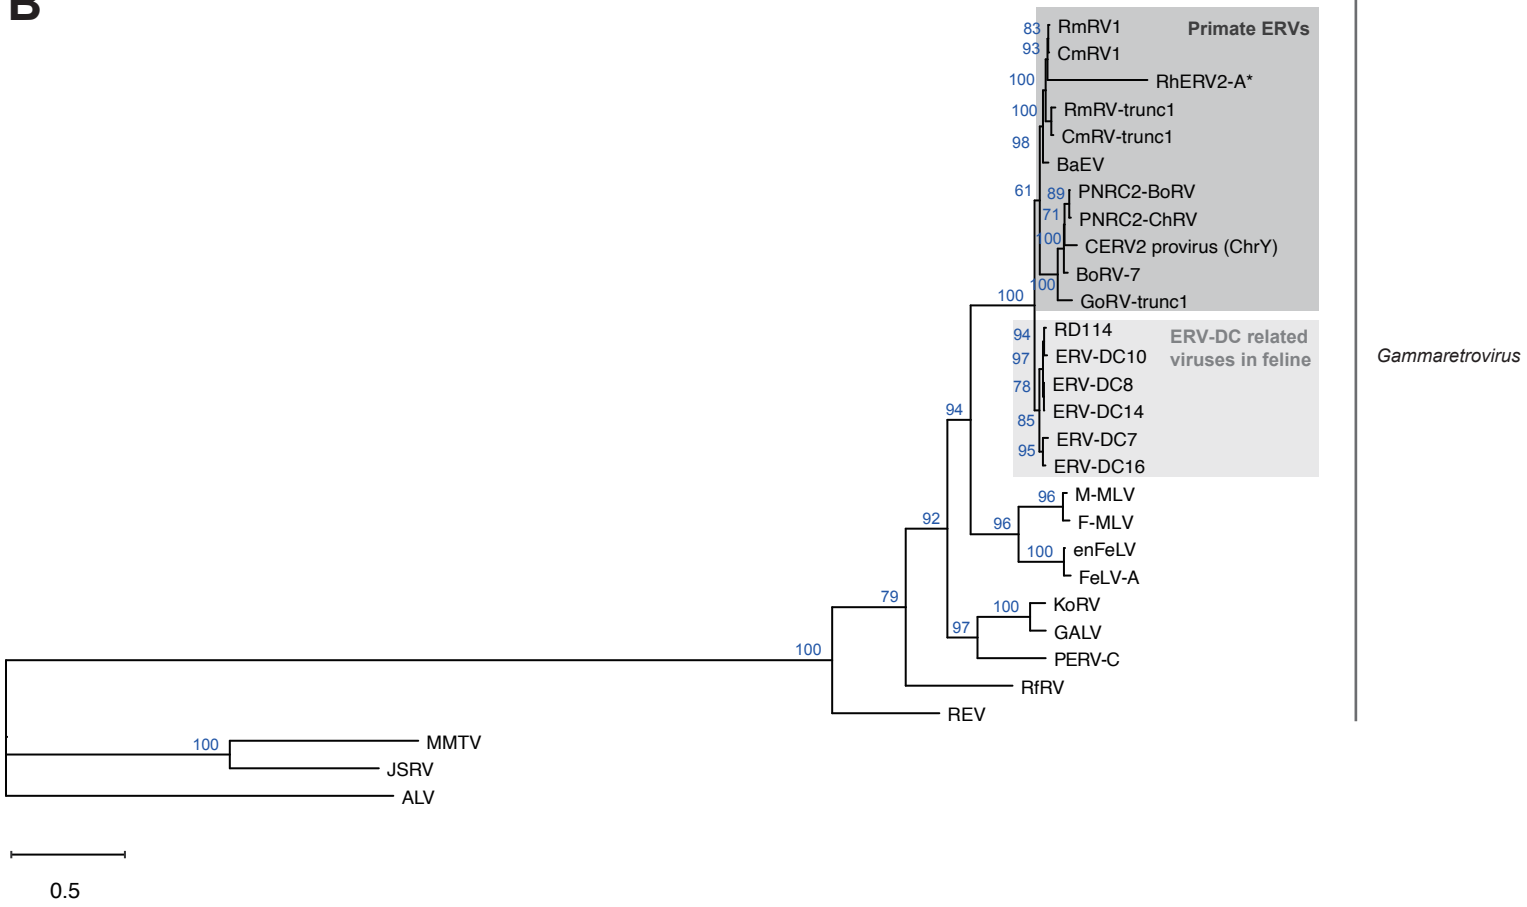

C

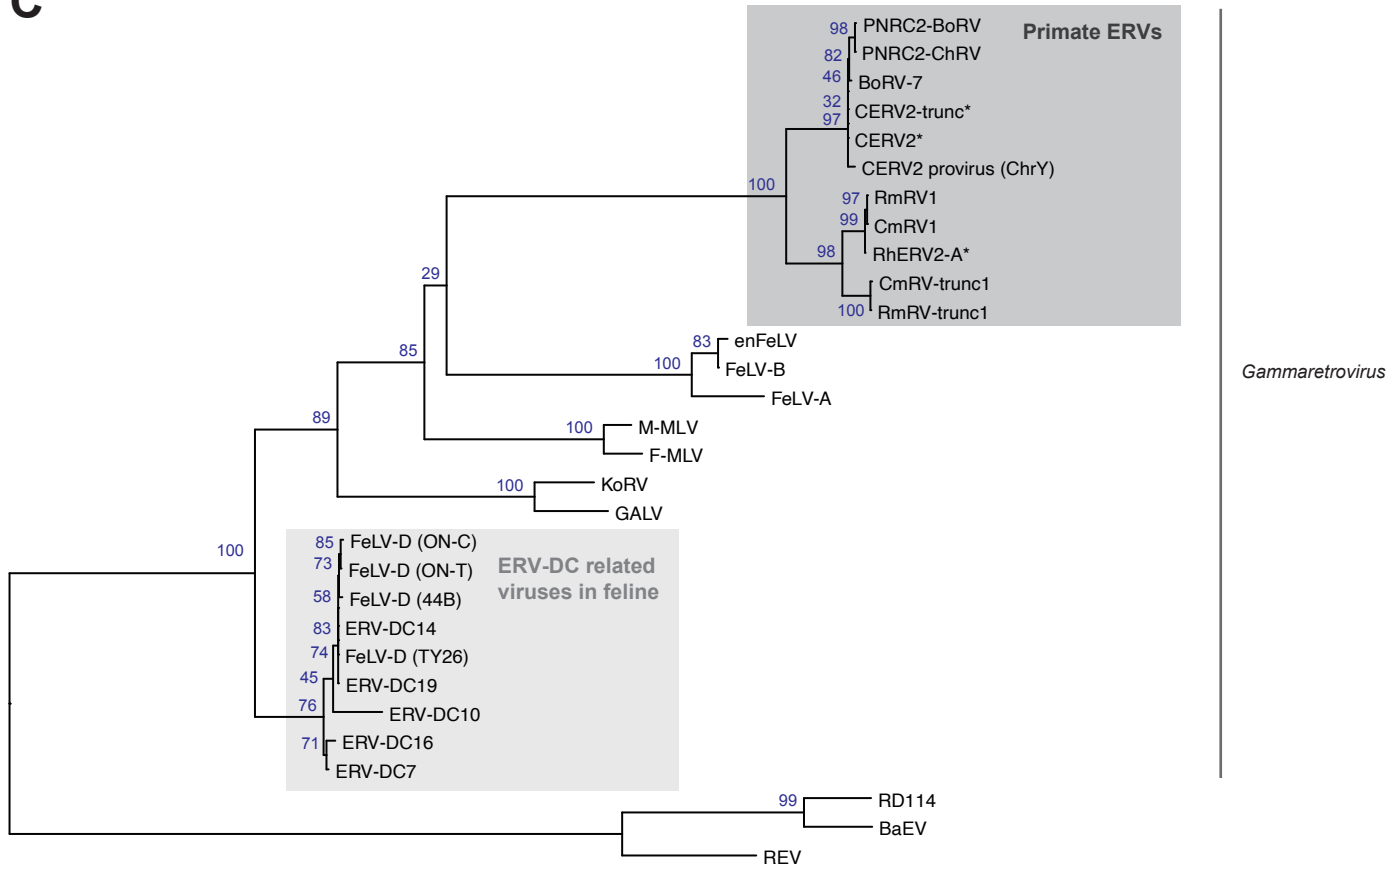

0.3

**Figure S10. Phylogenetic analyses using gammaretroviruses.** Phylogenetic tree using amino acid sequences of the *gag* gene **(A)**, the *pol* gene **(B)**, and the *env* gene **(C)**. The phylogenetic trees were constructed based on the maximum likelihood method for the *gag*, *pol* and the neighbor-joining method for the *env* genes. Scale bars indicate genetic distance (substitutions per site). Blue labels on branches indicate bootstrap support values (%) with 1,000 replicates. Colored boxes highlight CERV-related primate ERVs (dark gray) and ERV-DC related viruses in feline genomes (light gray). The asterisks indicate artificially synthesized sequences.

**A**

| ERV                   | Host                                               | Integrated age (MYA) | Ortholog (Species)                           |
|-----------------------|----------------------------------------------------|----------------------|----------------------------------------------|
| CmRV1                 | Crab-eating macaque ( <i>Macaca fascicularis</i> ) | unknown              | N.D.                                         |
| CmRV1_1               | Crab-eating macaque ( <i>Macaca fascicularis</i> ) | unknown              | N.D.                                         |
| CmRV1_2               | Crab-eating macaque ( <i>Macaca fascicularis</i> ) | 3.69 - 4.53          | chr14 : 107027464-107029344 (Rhesus macaque) |
| CmRV-trunc1           | Crab-eating macaque ( <i>Macaca fascicularis</i> ) | 3.69 - 4.53          | RmRV-trunc1 (Rhesus macaque)                 |
| RmRV1                 | Rhesus macaque ( <i>Macaca mulatta</i> )           | unknown              | N.D.                                         |
| RmRV-trunc1           | Rhesus macaque ( <i>Macaca mulatta</i> )           | 3.69 - 4.53          | CmRV-trunc1 (Crab-eating macaque)            |
| PNRC2-BoRV            | Bonobo ( <i>Pan paniscus</i> )                     | 2.82 - 6.55          | PNRC2-ChRV (Chimpanzee)                      |
| BoRV-7                | Bonobo ( <i>Pan paniscus</i> )                     | unknown              | N.D.                                         |
| PNRC2-ChRV            | Chimpanzee ( <i>Pan troglodytes</i> )              | 2.82 - 6.55          | PNRC2-BoRV (Bonobo)                          |
| CERV2 provirus (ChrY) | Chimpanzee ( <i>Pan troglodytes</i> )              | unknown              | N.D.                                         |
| GoRV-trunc1           | Gorilla ( <i>Gorilla gorilla</i> )                 | unknown              | N.D.                                         |

**B**

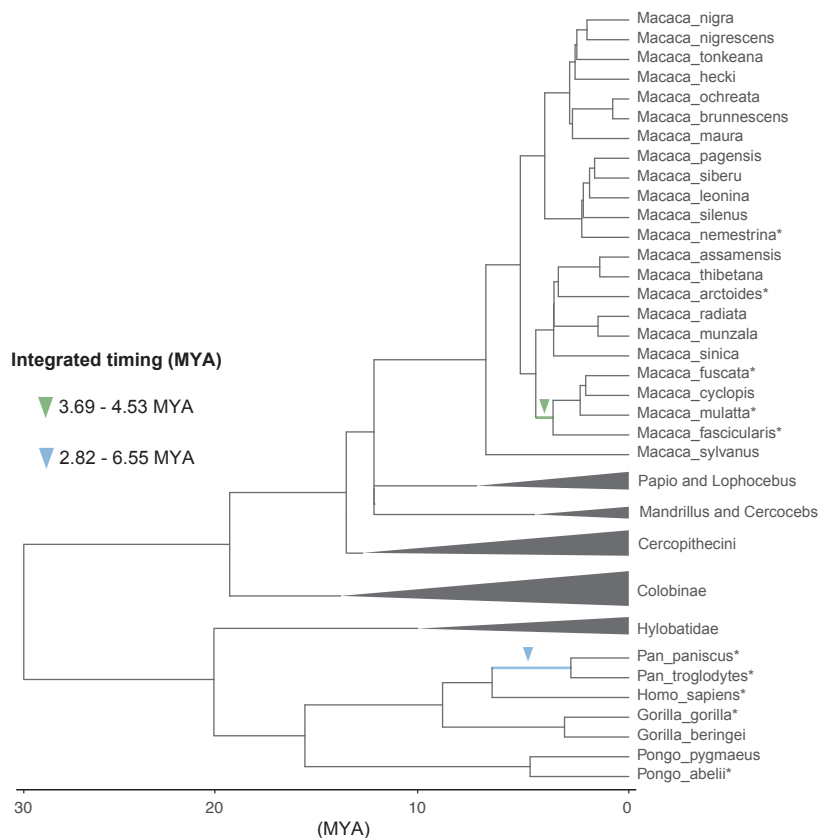

(\*: the species genome has been reported.)

**Figure S11. Integration timings and orthologous relationships of CERV-related ERVs. (A)** The integration timings of primate ERVs were estimated by the ortholog-dating method. MYA, million years ago; N.D., orthologs of the *env* gene were not detected; unknown, integration timing is unknown. All sequences represent Env proteins from primates including crab-eating macaque (CmRV1\_1, CmRV1\_2, and CmRV-trunc1), rhesus macaque (RmRV1 and RmRV-trunc1), bonobo (PNRC2-BoRV and BoRV-7), chimpanzee (PNRC2-ChRV and CERV2 provirus ChrY), and gorilla (GoRV-trunc1). Chr, chromosome. **(B)** Evolutionary history of primate species with the integration timings of CERV-related ERVs. The arrowheads indicate integration timings of the ancestor of CmRV-trunc1 and RmRV-trunc1 and that of CmRV1\_2 (green), and that of PNRC2-ChRV and PNRC2-BoRV (blue).

5' flanking

|             |      |                                                                                  |      |
|-------------|------|----------------------------------------------------------------------------------|------|
| CmRV-trunc1 | 1    | CCTGTTTTACATTCGTATTTTTTTCTGGGAAATATCTTGACATTATCTTCAACTAATTTTTGTCTCTGCTCTAC       | 80   |
| RmRV-trunc1 | 1    | .....T.....                                                                      | 80   |
| CmRV-trunc1 | 81   | TATTTTAGTTTAATTTCCAAGTATTTTGATATTGAACTTCAAGAGAACAGACATCGTGCCAGCCTTGACGTCTAATGC   | 160  |
| RmRV-trunc1 | 81   | .....A.....                                                                      | 160  |
| CmRV-trunc1 | 161  | TTTGGGGCGAGGGGAAATGTTTTGTTTTTTAATACTCAGTCACCTCTGTGCCAGGGTGGAGTGCATTTTAACT        | 240  |
| RmRV-trunc1 | 161  | .....G.....                                                                      | 240  |
| CmRV-trunc1 | 241  | TTAATGCGTTTTAACGAAGGTATGCACACAGTCCACATCACAAGATAACCAGGTTTGAAGGAATAGGTTTCCTTTGT    | 320  |
| RmRV-trunc1 | 241  | .....                                                                            | 320  |
| CmRV-trunc1 | 321  | AATCCTAAACGTTCTAGTCTGCTCATTTGAAAGCCATTATTTGAAGAAGGGTGCACGGGCTCCAGCTGGCCGCCAAAGGG | 400  |
| RmRV-trunc1 | 321  | .....                                                                            | 400  |
| CmRV-trunc1 | 401  | GACCTCCACAGGACACAGATTGAGTACCCGCTTCTTTGCGGGAGACGAAGGGCGGGACAGGAGGAAAGAAGGGAGAGG   | 480  |
| RmRV-trunc1 | 401  | .....                                                                            | 480  |
| CmRV-trunc1 | 481  | TATAAGTCACCTCTCCCGCTCCGGCGCGGGTTGGTCCGCTGAGTTGCGGAGAACAGACGGGGACCCGGAATGCGCT     | 560  |
| RmRV-trunc1 | 481  | .....                                                                            | 560  |
| CmRV-trunc1 | 561  | GTCGGTGACATCAGGAGGGGGGACTTCTATGTAGATGAGGCAGCGAGGGCTGCCGCTTCGCCGCTGCTGCTTCGC      | 640  |
| RmRV-trunc1 | 561  | .....                                                                            | 640  |
| CmRV-trunc1 | 641  | CACGAAGGGTTCCCGTGCTGTGGAGCGAGTCTGGGACCCTGGTCGGAAGTCCAGCTGTGTGTCAGGGCTA           | 720  |
| RmRV-trunc1 | 641  | .....                                                                            | 720  |
| CmRV-trunc1 | 721  | GGAGGGCTCCGGGATGCGCGGAGGCAAGTACCCTGTGTGTAAGGGTGAAGCATGTGAGGCTGTGGCGGGCGGAGG      | 800  |
| RmRV-trunc1 | 721  | .....-                                                                           | 799  |
| CmRV-trunc1 | 801  | GTTTCGAGCTCATACTTACCTGGCAGGGAGATACCATGATCACGAAGGTGGTTTTCCAGGGCGAGGCTTATCCATTGC   | 880  |
| RmRV-trunc1 | 800  | .....C.....                                                                      | 879  |
| CmRV-trunc1 | 881  | ACTCCGGATGTGCTGACCCCTGCGATTTCCCAAATGTGGAACTCGACTGCATAAATTTGTGGTAGTGGGGACTGCGT    | 960  |
| RmRV-trunc1 | 880  | .....                                                                            | 959  |
| CmRV-trunc1 | 961  | TCGCGCTTCCCGTATTTGTGTCGTTTTAAAAATAGACCTAATGTGTTGCAAGAGCAAATACTAGGTTTAACTGAG      | 1040 |
| RmRV-trunc1 | 960  | .....C.....                                                                      | 1039 |
| CmRV-trunc1 | 1041 | TTAGAACACAGATCTTTTTCTCCGTTTATAACTTATGCTTAACTAAAGATTTTATCAGGTCGTGGTTCTCTATCTTGT   | 1120 |
| RmRV-trunc1 | 1040 | .....C.....                                                                      | 1119 |
| CmRV-trunc1 | 1121 | AATCCCAGCGGTCTGCGAGATATGGCAGCGATGTTTATGTTAATTATATGGTGAACCTCTCTTTACTAATCTCTTAGCT  | 1200 |
| RmRV-trunc1 | 1120 | .....                                                                            | 1199 |
| CmRV-trunc1 | 1201 | TTGTGTGTGTGTGTTCTATAAAAAATGTTTTCTTTCCCGCTGGGAGCCAATGTGGACATTATTAACAGCAAAC        | 1280 |
| RmRV-trunc1 | 1200 | ...T.....                                                                        | 1279 |
| CmRV-trunc1 | 1281 | AGCCCGCTGGAGTGCATGTAGGATCTCGGCTTACTGCAGCCTCTGCCTCCTGCCTCAAGCTATTCTCTGCCTCAGCC    | 1360 |
| RmRV-trunc1 | 1280 | .....                                                                            | 1359 |
| CmRV-trunc1 | 1361 | AGAGACTACTCAGCTCCGGAGTAACTGGGATGTCAGGCGCAGGCCACCAAAAAATTAGCCCGCTAATTTTTTGAATT    | 1440 |
| RmRV-trunc1 | 1360 | .....T.....                                                                      | 1439 |
| CmRV-trunc1 | 1441 | TTTGGTAGAGACAGGGTTTTCGCCGGCCAGGCGCAGTGGCTCACGCCTGTAATCCAATACTTTGGGAGCCGAGGAGGG   | 1520 |
| RmRV-trunc1 | 1440 | .....                                                                            | 1519 |
| CmRV-trunc1 | 1521 | TGACCATGAGTTCAGGATATCGAGACCATCTGGCTA--ACAGTGAGACCCATCTCTACCAAAAAATACAAAAATAATA   | 1598 |
| RmRV-trunc1 | 1520 | .....G.....AC.....                                                               | 1599 |
| CmRV-trunc1 | 1599 | TATGTGTGTATATAGATATATATAGATATATATATAAACCAGGCGTGCCTGTAATCCAGCTACTCGGGAGACTGA      | 1678 |
| RmRV-trunc1 | 1600 | .....C.....                                                                      | 1679 |
| CmRV-trunc1 | 1679 | GGCAAGAAAACCGCTTGAACCCGGGAGGCAGAGTTGCAGTAAGCTGAGATCGCGCCACTGCACTCCAGCCTGGGTGACA  | 1758 |
| RmRV-trunc1 | 1680 | .....                                                                            | 1759 |
| CmRV-trunc1 | 1759 | GAGCGAGACTCCGTCTC--AAAAAAAAAAAAAAAAAGAGACAGGTTTTCCGCATGTTGGTCAGGCTTATCTGAACTCCT  | 1836 |
| RmRV-trunc1 | 1760 | .....AA.....A.....                                                               | 1839 |
| CmRV-trunc1 | 1837 | GACCTCAAGTTATCCTCCCGCTGGGCTCCCAAATGTTGGGATTACAGGCTGAGCCACCGCGCCCGGCTGTTTACAG     | 1916 |
| RmRV-trunc1 | 1840 | .....                                                                            | 1919 |
| CmRV-trunc1 | 1917 | GCTTACAGACACATTTGTTTACAACTTTACATGCACAATCAATTGCAGTTAGTGTTCATTTCTTTTTTTTTTTTCG     | 1996 |
| RmRV-trunc1 | 1920 | .....G.....                                                                      | 1998 |
| CmRV-trunc1 | 1997 | TTTTTTGTTTTGTTTTGTTTTTCCAGTGTGGCCCAAGGAAGCCAAATGTAGACAACCTGCTTTAGAGAGTTGA        | 2076 |
| RmRV-trunc1 | 1999 | .....                                                                            | 2078 |
| CmRV-trunc1 | 2077 | TTCATGGTCCACTGGGTTATACTTATTGCCTATATTTGCCTATTATTGATATTTCCAAATTTGATTTTTTATTAT      | 2156 |
| RmRV-trunc1 | 2079 | .....-                                                                           | 2157 |
| CmRV-trunc1 | 2157 | TTTTTATTTATTTTATTTTATTTTATTTTGGAGACGAGTCTCGCTCTGCCACCCAGGCTGGAGTGCAGTGGCCGATCT   | 2236 |
| RmRV-trunc1 | 2158 | ...A.T.....                                                                      | 2237 |
| CmRV-trunc1 | 2237 | CAGCTACTGCAAGCTCCGCTCCAGGTTACGCCATTCTCCTGCCTCAGCCTCCGACTAGCTGGGACTACAGGCGCC      | 2316 |
| RmRV-trunc1 | 2238 | .....                                                                            | 2317 |
| CmRV-trunc1 | 2317 | CGCCACCTCGCCCGGTAGTTTTTTGTATTTTTTAGTAGAGACGGGTTTACCCTGTCAGCCAGGATGGTCTCGATCTC    | 2396 |
| RmRV-trunc1 | 2318 | .....                                                                            | 2397 |
| CmRV-trunc1 | 2397 | CTGACCTTGTGATCCGCCCTCGGCTCCCAAAGTGTGGGATTACAGGCTTGAGCCAACCGCCCGGCTCAAATTT        | 2476 |
| RmRV-trunc1 | 2398 | .....C.....                                                                      | 2477 |

|             |      |                                                                                   |      |
|-------------|------|-----------------------------------------------------------------------------------|------|
| CmRV-trunc1 | 2477 | GATTTTTTAAAAAGCGTTTTCTGAAGCGCTCAAGCTTCTCTAATAATATGGGAAGCTAAACCAGATTGGATGTAACA     | 2556 |
| RmRV-trunc1 | 2478 | .....T.....A.....C.....                                                           | 2557 |
| CmRV-trunc1 | 2557 | AAACCCAACTGGAAATCTGCAATTTCTAACCTTTATGTTAGATCAAGAAGCAAACACCCACCAGTCCAAGGGTCAGGGA   | 2636 |
| RmRV-trunc1 | 2558 | .....                                                                             | 2637 |
| CmRV-trunc1 | 2637 | AGCTGAAGATCATGCCTGAGCTGTAACAACACCCCTCCCAGTATACAAAAGCCTATAACAGCCACTTGAATTCATCTTC   | 2716 |
| RmRV-trunc1 | 2638 | .....                                                                             | 2717 |
| CmRV-trunc1 | 2717 | CAAAATGTCTCCTGTGGCCAGGCTAACCCAGAGCTATCTAAAGAGGCAAACTCTGGGAAATGTGCATTAGCTTAGCAAAA  | 2796 |
| RmRV-trunc1 | 2718 | .....                                                                             | 2797 |
| CmRV-trunc1 | 2797 | CTGACACTGAAACTAGGCCTCATAAACTTAAAAAATTAACACCAGATGGCCATGGATAGCCCCCAATGTTCCCGGAAC    | 2876 |
| RmRV-trunc1 | 2798 | .....                                                                             | 2877 |
| CmRV-trunc1 | 2877 | TCAAACAGAAAAACAATTCAGGAATGTACATCAGGGGTCCAGCCCTAACAGTTCTAGGAAAGTATGGCATGAGGTCC     | 2956 |
| RmRV-trunc1 | 2878 | .....C.....                                                                       | 2957 |
| CmRV-trunc1 | 2957 | AGCCCTAAACCATTCCAGGAAAGAAACCCATAAGCTCAAGCCCCGACCAATCAGAACCAGACACCTTGCTCAGGCCATAG  | 3036 |
| RmRV-trunc1 | 2958 | .....T.....                                                                       | 3037 |
| CmRV-trunc1 | 3037 | CCAGACCCAAATCATCTTGCGCCTTAAGCTTGTGTTGAACTTCGCGCCAAAAGCTGTGTTGAACTTGTGTTGCCTATAT   | 3116 |
| RmRV-trunc1 | 3038 | .....                                                                             | 3117 |
| CmRV-trunc1 | 3117 | AAACAGCCTGTAATAAGCGTTCGGGGTCCCAGGGGCAACTTAGAGCTTGGGACCTAGTGCCTAGCAATAAATAACTC     | 3196 |
| RmRV-trunc1 | 3118 | .....                                                                             | 3197 |
| CmRV-trunc1 | 3197 | TCTGCTGTAATCTCGTGTCCGTGATCCTTCACGGCGACCCCTGCCAGGAGGAATCGAGAGTTCGGTTCCAACATTTG     | 3276 |
| RmRV-trunc1 | 3198 | .....                                                                             | 3277 |
| CmRV-trunc1 | 3277 | GTACGTTGGCCGGGAAGTGGGTCTCCGAGGACCCCGACCCATCCGGCGGAGACCTATCTGGCCCGGCCATGGACTG      | 3356 |
| RmRV-trunc1 | 3278 | ..G.....T.....A.....                                                              | 3357 |
| CmRV-trunc1 | 3357 | CTGACTGAACGGACCTACCAGTACTTTCGTTTTGTTCTGTCTGTCTTGGCCGTAACCTCTGAACTCTGGGAGTACTCC    | 3436 |
| RmRV-trunc1 | 3358 | .....A.....A.....A.....                                                           | 3437 |
| CmRV-trunc1 | 3437 | TTCTGAATTAAGTGGGAAGGGGACAGATGTGTCCGCACCTTCCCACTTCCCCCGGGGACGCCCTGGCGGTAGTC        | 3516 |
| RmRV-trunc1 | 3438 | .....C.....                                                                       | 3517 |
| CmRV-trunc1 | 3517 | TGGGAGAAGGCTGACGACTCAGTCAGCCTCCTTAAATCTGTAGGCAGGTTGCCCTCTGCCCTCTGAGTATTTGTGATCTT  | 3596 |
| RmRV-trunc1 | 3518 | .....C.....                                                                       | 3597 |
| CmRV-trunc1 | 3597 | GTGGCGCACCTCTCTGGCCGCGGGTCTCTCTTACTTGTCTGGTCTTTGTTTTCTTACTTTCGTAAAGTCTTGTCTAT     | 3676 |
| RmRV-trunc1 | 3598 | .....G.....T..                                                                    | 3677 |
| CmRV-trunc1 | 3677 | ACGTGGACGAAATGGGACAGACGTTGACGACTCCTTGTCTCTGACCTGACTCACTTCCCTGACGTCGGGCTCGAGCC     | 3756 |
| RmRV-trunc1 | 3678 | .....                                                                             | 3757 |
| CmRV-trunc1 | 3757 | CACAACCTCTCCGTAGAAGTCCGTAAGGACGATGGCAAAAATCTGCTCGTCCGAGTGGCTACCCTCCATGTTGGGTG     | 3836 |
| RmRV-trunc1 | 3758 | .....                                                                             | 3837 |
| CmRV-trunc1 | 3837 | GCCCGGGACGGAACATTTGACCTCCCAATTACTTACATGTTAAAGCAACAGTATGGATCCTGGGCCACCGGACACC      | 3916 |
| RmRV-trunc1 | 3838 | .....G.....                                                                       | 3917 |
| CmRV-trunc1 | 3917 | CAGACCAGTGGCCTACATAAATTACTTGGGAGGATCTGGTCCGAAACCCCTCCCTCTGGGTGAAACCCCTCCATCC      | 3996 |
| RmRV-trunc1 | 3918 | .....                                                                             | 3997 |
| CmRV-trunc1 | 3997 | CCTTCCCACCCAGTCTACCTTCTTGCCTTAGAAGCCCCGAAGAATCGGAAACCGGACCCGCATAAGCCAGTCTCTCC     | 4076 |
| RmRV-trunc1 | 3998 | .....T.....                                                                       | 4077 |
| CmRV-trunc1 | 4077 | AGATGAACCCAGAGGGATCTCCTCCTTCTGACCCCTGCCTCCTCCACCTCAAACCCCTTCTGAGACCTCCACCTT       | 4156 |
| RmRV-trunc1 | 4078 | .....                                                                             | 4157 |
| CmRV-trunc1 | 4157 | ACGCTTACCCCTTGCCCTTGCCTTGTCCCAGCCCTTTCCTCTACCGCCTCGGCCCTACCCTTCTCCAACCTCCCCC      | 4236 |
| RmRV-trunc1 | 4158 | .....                                                                             | 4237 |
| CmRV-trunc1 | 4237 | TCGGCCCTCCCTCGACCCCGTCTCCTTCTCCAGCCCCGCCGAACCTCAACCCCTCGGACGCTGCCACCGACACCTCGTCT  | 4316 |
| RmRV-trunc1 | 4238 | .....A.....                                                                       | 4317 |
| CmRV-trunc1 | 4317 | CCGCTTGGCGGACTGAGGACCCAGATGGCCCTTCCACTTGGCAATCCCTCTTTTCCCTCCGTACCGTCAATCACA       | 4396 |
| RmRV-trunc1 | 4318 | .....T.....G..                                                                    | 4397 |
| CmRV-trunc1 | 4397 | CGGTCCAGTACTGGCCCTTCTTGCTCTGACCTCTACAACCTGGAAACTCATAACCCCTTCTTTTCCCAAGACCCCTCAG   | 4476 |
| RmRV-trunc1 | 4398 | .....                                                                             | 4477 |
| CmRV-trunc1 | 4477 | GCCCTAACCTCGTTGATAGAAATCCATTCCTCACCACCAGCCACCTGAGATGATTGCCAGCAACTCTGCAGGTCT       | 4556 |
| RmRV-trunc1 | 4478 | .....                                                                             | 4557 |
| CmRV-trunc1 | 4557 | CCTAACCT--ACTGAAGAAAGGCAGCAGTCTCCTGGAGGCCGGAAAAATGTGCCAGGGCCAGGAGCCCTCCCAACCCA    | 4634 |
| RmRV-trunc1 | 4558 | .....TA.....                                                                      | 4637 |
| CmRV-trunc1 | 4635 | ACTTCCCAACGAAATAGACGAGGGATTTCCCTCACCCGCCGACTGGGACTATGAAACGGCACCAGGTAGGGAGATC      | 4714 |
| RmRV-trunc1 | 4638 | .....                                                                             | 4717 |
| CmRV-trunc1 | 4715 | TCCGAATCTATCGCCAGGCTCTGTGGCGGGTCTCAAAGGGCAGGAAAACGCCCAAAATTTGGCCAAGTAAGAACC       | 4794 |
| RmRV-trunc1 | 4718 | .....                                                                             | 4797 |
| CmRV-trunc1 | 4795 | ATAATTGAGAAAGGACGAAAGCCCGCAGCCTTTATGGAGAGGCTTCTGGAAGAGTTCGGAATGTATAGCCATTTCGA     | 4874 |
| RmRV-trunc1 | 4798 | .....G.....                                                                       | 4877 |
| CmRV-trunc1 | 4875 | TCCAGAGCCCTAGAACATAAGGCTACCGTGGTTCATGGCGTTCATAGACCAAGCTGCATCCGATATCAAAGGAAAACCTCC | 4954 |
| RmRV-trunc1 | 4878 | .....                                                                             | 4957 |

5' flanking ← → 5' LTR

Target site duplication

5' LTR ←

gag-pol →



|             |      |                                                                                  |      |
|-------------|------|----------------------------------------------------------------------------------|------|
| CmRV-trunc1 | 4955 | AAAGGTAGATGGGATCCAGACTTATGGATTACAGGAATTGGTTAGGGAGGCAGAAAAAGTATATAATAAGAGAGAAACC  | 5034 |
| RmRV-trunc1 | 4958 | .....                                                                            | 5037 |
| CmRV-trunc1 | 5035 | CCTGAGGAAAGGGAAAGCCAGGTAGCGAAAGAACAGAGGAGCGAGAGGATCGAAGGGATCGAAAGAGGGATAAGCATT   | 5114 |
| RmRV-trunc1 | 5038 | .....                                                                            | 5117 |
| CmRV-trunc1 | 5115 | AACAAAAATCCTGGCGCAGTAGTAACAGAGAAAAACCAGGAGAGAGGGAGAGAAGCGGAGCGCCAAAAAGTGAAAA     | 5194 |
| RmRV-trunc1 | 5118 | .....A.....                                                                      | 5197 |
| CmRV-trunc1 | 5195 | AAGACCAGTGTGCCTACGCAAAAGAACGGGGAGCTTAGATTAAAGATTGCCCAAGCGTCTAAAGACCAGAAGAAACCTG  | 5274 |
| RmRV-trunc1 | 5198 | .....A.....                                                                      | 5277 |
| CmRV-trunc1 | 5275 | TCGCTGTCTCACCCCTAGTGAAGATAGCGAATAGGGGTGTCAAGGCTCTGGAGCCCCCCCCAGCCCCGGCTAACTCTC   | 5354 |
| RmRV-trunc1 | 5278 | .....                                                                            | 5357 |
| CmRV-trunc1 | 5355 | TCTGTAGGGGGCACCCTACCACCTTCTTGGTGGATACAGGGGCCAACATTCAGTTTTGACAAAGGCAGACGGGCCCT    | 5434 |
| RmRV-trunc1 | 5358 | .....                                                                            | 5437 |
| CmRV-trunc1 | 5435 | GTCTTCTCGCATATCCTGGGTACAGGGGGCAACAGGGGAAAATGCACAAGTGGACTAACCCGGCAGTTAATCTTG      | 5514 |
| RmRV-trunc1 | 5438 | .....G.....A.....                                                                | 5517 |
| CmRV-trunc1 | 5515 | GACAAGGAATGGTAACACATTCCTTCTTGGTGGTACCTGAATGCCCATACCCCTCCTAGGGCGAGATCTTCTGACCAAG  | 5594 |
| RmRV-trunc1 | 5518 | .....                                                                            | 5597 |
| CmRV-trunc1 | 5595 | CTCGAAGCCCAATCCACTTCTCCGAGACAGGGGCCAGGTATTAGATCGGGACGCTCAGCCATCCAATCTTAAGTGT     | 5674 |
| RmRV-trunc1 | 5598 | .....A.....                                                                      | 5677 |
| CmRV-trunc1 | 5675 | GTCTTGCAAGATGAGTATCGGCTTTTGTAGCGTCCGGTCACTACTAGCCTCCCTGATGTTGGTTGCAAGACTTCCCC    | 5754 |
| RmRV-trunc1 | 5678 | .....T.....                                                                      | 5757 |
| CmRV-trunc1 | 5755 | AAGCTTGGGCGGAAACGGGAGGACTTGGGCTGGCCAAAGTATCAAGCCCCAATCATAATTGATCTAAAGCCACGGCGGTG | 5834 |
| RmRV-trunc1 | 5758 | .....                                                                            | 5837 |
| CmRV-trunc1 | 5835 | CCCGTGTCTATTAAGCAATATCCCATGAGCCGAGAGGCTCATATAGGAATTCGGCAGCATTAAACAAATTTCTAGAAGT  | 5914 |
| RmRV-trunc1 | 5838 | .....                                                                            | 5917 |
| CmRV-trunc1 | 5915 | CGGAGTGTGCGACCTTGTGCTTGGCTTGGAACTCCTCTTCTGCCAGTAAAAAGCCTGGTACTCAGGATTACAGGC      | 5994 |
| RmRV-trunc1 | 5918 | .....                                                                            | 5997 |
| CmRV-trunc1 | 5995 | CTGTCCAAGACTTGAGAGAAATTAACAAAAGGACCATGGATATCCATCCACGGTCCCCAACCCCTTACAATTTGCTCAGC | 6074 |
| RmRV-trunc1 | 5998 | .....                                                                            | 6077 |
| CmRV-trunc1 | 6075 | ACCTTGAGACCAGACTACAACCTGGTATACAGTGTAGATTTAAAAGATGCTTCTTCTGTTTACCTCTGGCCCCCAAAG   | 6154 |
| RmRV-trunc1 | 6078 | .....                                                                            | 6157 |
| CmRV-trunc1 | 6155 | CCAAGAACTCTTGCCTTTGAGTGAAGGACCCTGAGAAAGGAATTCGGGCCAATTGACCTAGACCCGGCTTCCCCAAG    | 6234 |
| RmRV-trunc1 | 6158 | .....G.....                                                                      | 6237 |
| CmRV-trunc1 | 6235 | GATTCAGAACTCTCCACTCTCTCGATGAGGCTCTTCATCGAGACCTGACCGACTCCGGACCCAAAATCCAGAAGTG     | 6314 |
| RmRV-trunc1 | 6238 | .....                                                                            | 6317 |
| CmRV-trunc1 | 6315 | ACCTACTCCAGTATGTAGATGACCTCCTCCTGGCTGCCCTACAAAAGAAACCTGTATACAAGTACCAGGCATCTACT    | 6394 |
| RmRV-trunc1 | 6318 | .....                                                                            | 6397 |
| CmRV-trunc1 | 6395 | CCAGGCACTGGGTGAAAAAGGATACCGGGCATCCGCCAAGAGGCACAGCTCTGTGACCAAGGTAAACATACCTGGGGT   | 6474 |
| RmRV-trunc1 | 6398 | .....T.....                                                                      | 6477 |
| CmRV-trunc1 | 6475 | ATATCCTGAGTGAAGGAAAAGGTGGCTCACCCCTGGGCGCATAGAGACAGTGGTTCGCATTCCACCACCACGAACGCC   | 6554 |
| RmRV-trunc1 | 6478 | .....                                                                            | 6557 |
| CmRV-trunc1 | 6555 | AGAGAGGTATGTGAATTCCTGGGACTGCTGGGTTCTGTGCTTGTGGATACCTGGTTATGCTGAACTGGCCGCCCCCT    | 6634 |
| RmRV-trunc1 | 6558 | .....C.....                                                                      | 6637 |
| CmRV-trunc1 | 6635 | TTATGCACTACCAAGGAAAGTACCCTTTCACCTGGCAGACAGAGCATCAATTGGCTTTTGGAGCAATAAAAAGGCAC    | 6714 |
| RmRV-trunc1 | 6638 | .....                                                                            | 6717 |
| CmRV-trunc1 | 6715 | TCTTGTCTGCCAGCCCTTGGGTTACCGGACCTCAAAGCCCTTACCTCTTCTGGAGGAGGGCAAGGATTGCC          | 6794 |
| RmRV-trunc1 | 6718 | .....T.....C.....                                                                | 6797 |
| CmRV-trunc1 | 6795 | AGAGGAGTCTGACCCAAAATTTGGGACCTTGAAAAGACCGGTAGCATACCTGTCTAAAAGCTGGACCTGTGGCGGC     | 6874 |
| RmRV-trunc1 | 6798 | .....A.....                                                                      | 6877 |
| CmRV-trunc1 | 6875 | CGGCTGGCCCCGTGTCTTCGTATCATGGCAGCCACCGCTATGCTGGTCAAGGACTCTGCTAAATTGACCTTGGGCAGC   | 6954 |
| RmRV-trunc1 | 6878 | .....T.....G.....                                                                | 6957 |
| CmRV-trunc1 | 6955 | CCTAATCTGTTATTACCCACATGCTCTAGAGCCATAGTGGCGAGCCCCGGACCGGTGGATAACCAAGCAGCCTTA      | 7034 |
| RmRV-trunc1 | 6958 | .....T.....                                                                      | 7037 |
| CmRV-trunc1 | 7035 | ACCCACTATCAGGCCCTCCTACTGGACACGGATCGCGTCCAGTTTGGCCCTCCGGTACCTTAAACCTGCTACGCTGCT   | 7114 |
| RmRV-trunc1 | 7038 | .....                                                                            | 7117 |
| CmRV-trunc1 | 7115 | GCCGGTACCAGAAGCAACCAAGCCACACGACTGTGGCAGATATTGGTGGAGACCCATGGAACCGGGGAGACCTTA      | 7194 |
| RmRV-trunc1 | 7118 | .....                                                                            | 7197 |
| CmRV-trunc1 | 7195 | AAGACCAAGAACTCCAGACGCGGATCACACCTGGTACACAGACGGCAGGATTACCTTGACTCAGGTACCCGGAGGGCG   | 7274 |
| RmRV-trunc1 | 7198 | .....                                                                            | 7277 |
| CmRV-trunc1 | 7275 | GGAGCGGAGTAGTAGATGGCCACAACACCAATTTGGGCACAATCACTACCTCTGGCAGCTACACAGAAGCTGAGTT     | 7354 |
| RmRV-trunc1 | 7278 | .....                                                                            | 7357 |
| CmRV-trunc1 | 7355 | AATAGCACTAACCAAGGCCCTAGAGCTGTCCAAGGAAAGAAAGCTAACATTTATATTGATAGCCGATATGCTTTGCAA   | 7434 |
| RmRV-trunc1 | 7358 | .....                                                                            | 7437 |

|             |      |                                                                                   |      |
|-------------|------|-----------------------------------------------------------------------------------|------|
| CmRV-trunc1 | 7435 | CGGCTCATACTCATAAAAAATATTTATTAATAAAAGAGGTCCTCTAACTTCAGAGGAAAAGAAATCAAGAACAAAGCTGAA | 7514 |
| RmRV-trunc1 | 7438 | .....                                                                             | 7517 |
| CmRV-trunc1 | 7515 | ATAATTGCCTTATTAATAAGCCCTTTTCTTCCTCAAGAGTGGCCATAATTCAGTCCCGGACACCAGAAAGGACAGGA     | 7594 |
| RmRV-trunc1 | 7518 | .....                                                                             | 7597 |
| CmRV-trunc1 | 7595 | TCCAGTAGCAGTAGGAAACAGACAGGCTGACCAATGGCAAGGAGCCGATGGCGGAAGTACTGACCTAGCCACAG        | 7674 |
| RmRV-trunc1 | 7598 | .....G.....                                                                       | 7677 |
| CmRV-trunc1 | 7675 | AACCTGACGAAACCAGCCACATAACCATTGAACATACCTATACCTCAGAAGACCAGGAAGCAAGAGCCATAGGGGCT     | 7754 |
| RmRV-trunc1 | 7678 | .....                                                                             | 7757 |
| CmRV-trunc1 | 7755 | ATAAAAAACAAAGACACTAAAACTGGAAAAAGGAGAAAGATAGTCCCTTCCCAAAAAGAGGCCCTGGCAATGATCCA     | 7834 |
| RmRV-trunc1 | 7758 | .....                                                                             | 7837 |
| CmRV-trunc1 | 7835 | GCAGATGCATGCCTGGACACACTTGAGTAATCGAAAGCTGAAATGTTGATTGAAAAAAGTACTTTCTAATCCCAAGG     | 7914 |
| RmRV-trunc1 | 7838 | .....                                                                             | 7917 |
| CmRV-trunc1 | 7915 | CAAGTACTCTCGTAGAACAGTAACATCTGCCTGTAAGGTCTGCCAGCAGGTAACCGTGGGGCTACCCGAGTACCAGCA    | 7994 |
| RmRV-trunc1 | 7918 | .....                                                                             | 7997 |
| CmRV-trunc1 | 7995 | GGGAAACGAGCTCGTGGTAACCGCCAGGGCCCTATTGGGAAATAGACTTCAGTGAAGTAAACCTCACTATGCTGGATA    | 8074 |
| RmRV-trunc1 | 7998 | .....                                                                             | 8077 |
| CmRV-trunc1 | 8075 | TAAGTACTTACTGGTGTGTTGATAGTACCTTTTCAGGATGGGTAGAAGCCTACCCACCCGCAAGAACGGCACACATAG    | 8154 |
| RmRV-trunc1 | 8078 | .....                                                                             | 8157 |
| CmRV-trunc1 | 8155 | TAGCCAAGAAAATTCGGAAGAAATCTTCTCTAGATTCGGACTCCCAAGGTAATGGGTGAGATAACGGCCGGCCTTT      | 8234 |
| RmRV-trunc1 | 8158 | .....C                                                                            | 8237 |
| CmRV-trunc1 | 8235 | GTTTCTCAGGTAAGTCAGGGCTAGCCAGGATATGGGGATTAATGGAAATGCAATTTGCTATAGACCCAGAGCTC        | 8314 |
| RmRV-trunc1 | 8238 | .....A...                                                                         | 8317 |
| CmRV-trunc1 | 8315 | AGGACAGGTAGAAAGGATGAATAGAACAAATAAAGAGACCCTTACTAAATTGACCTTAGAGACTGGTTTAAAGATTGGA   | 8394 |
| RmRV-trunc1 | 8318 | .....                                                                             | 8397 |
| CmRV-trunc1 | 8395 | GACGCCTCTATCCCTAGCTTTGTTAAGAGCCAAAATACGCCTAACCGCTTTGGGCTCACTCCATATGAAATCTCTAC     | 8474 |
| RmRV-trunc1 | 8398 | .....A.....C.....                                                                 | 8477 |
| CmRV-trunc1 | 8475 | GGAGGACCTCCCCCTTTGTCACCTTACTTGACTCCTCTCCCCCTCCGATCCTAAGACTGATCTACAGCCCGGCTAAA     | 8554 |
| RmRV-trunc1 | 8478 | .....                                                                             | 8557 |
| CmRV-trunc1 | 8555 | AGGACTCCAAGCAGTACAGGCCAAATCTGGGCCCTTGGCAGAACTGTACCAGCAGGACATCCACAGACCAGCCACC      | 8634 |
| RmRV-trunc1 | 8558 | .....A.....T.....                                                                 | 8637 |
| CmRV-trunc1 | 8635 | CCTTCCAGTGGGGACTCTGTCTACGTTAGGCGGCACCGCTCTCAAGGACTAGAGCCTCGGTGGAAGGACCTACATT      | 8714 |
| RmRV-trunc1 | 8638 | .....                                                                             | 8717 |
| CmRV-trunc1 | 8715 | GTTCTCTGACCACCCACAGCCATAAAGTTGACGGAATCTCCACTTGGATCCACGATCCACGCCAAGGCTGCTCC        | 8794 |
| RmRV-trunc1 | 8718 | .....                                                                             | 8797 |
| CmRV-trunc1 | 8795 | AGAGACGCCGGACCAACACCACCTGAGACATGGAACTCCGACGCTCCAAGGACCCGCTCAAGATAAGACTCTCTCGTA    | 8874 |
| RmRV-trunc1 | 8798 | .....                                                                             | 8877 |
| CmRV-trunc1 | 8875 | TCTAACCCCTTGCTTATTGCTTGCCCTCCTCCCTGCGCCGCTGGCAGTAATAACCCACGGGACATATGAAACCGCCCG    | 8954 |
| RmRV-trunc1 | 8878 | .....                                                                             | 8957 |
| CmRV-trunc1 | 8955 | GATATATATTCAATTGATAATAACCCACCGCCATATAACCTGACCTGGCAGGTAATTAATTTAATAATCATGAGTCC     | 9034 |
| RmRV-trunc1 | 8958 | .....                                                                             | 9037 |
| CmRV-trunc1 | 9035 | CTAGGTGAAACCTCAAAAATTGCTCCTATAGGACTTGGTTCCTGACCTCTATTTCAACCTAGATAAAGTAGCAGGGGT    | 9114 |
| RmRV-trunc1 | 9038 | .....                                                                             | 9117 |
| CmRV-trunc1 | 9115 | AAATGAAATGGAGGGGGAGAATGGAGAAAACAGGCTAGAAGAGTGTCCATCAGCCGGAACGGGTCTATGCCTGTCCCG    | 9194 |
| RmRV-trunc1 | 9118 | .....                                                                             | 9197 |
| CmRV-trunc1 | 9195 | GATTTAGGACAGGGGATATGGAAAAAATTTGGAGATATAACTCACCTGTATGCTATAGTTGGTCTGTGTAATAAT       | 9274 |
| RmRV-trunc1 | 9198 | .....                                                                             | 9277 |
| CmRV-trunc1 | 9275 | AATGATGGGGAATGGAAATGGGCCACGAAACCTGGTACATAACCATGTCCTTTGTCCAGCCCTGCACCAGAACCCGATA   | 9354 |
| RmRV-trunc1 | 9278 | .....                                                                             | 9357 |
| CmRV-trunc1 | 9355 | TTCAAAAAATGCAATCTGGTCCGATCAAGTTGAGGATGCGGCAAAAATCTGATAATAGTTGGATAACAGGGTTAATAT    | 9434 |
| RmRV-trunc1 | 9358 | .....                                                                             | 9437 |
| CmRV-trunc1 | 9435 | GGGGCCTTTATCTATACCAGAAGCCACTGTATGGGATCCCTATTCAAATAGATTACTAGTTGACCCGGACATAGCCCT    | 9514 |
| RmRV-trunc1 | 9438 | .....C.....                                                                       | 9517 |
| CmRV-trunc1 | 9515 | GTTGCAGTAGGGCTGAACAGGCTTATCAGAAGAAAAGAGCCCCGGTTCCCATACCGGAGAGCCCCAACCAAAAGC       | 9594 |
| RmRV-trunc1 | 9518 | .....C.....                                                                       | 9597 |
| CmRV-trunc1 | 9595 | TCCTCAAAGCACTTCCCGCCCTTGATCTCCGCTCCTCTGAATACACATCTTCAGCCAAAACGTACCCGCTAGCCCC      | 9674 |
| RmRV-trunc1 | 9598 | .....A.....                                                                       | 9677 |
| CmRV-trunc1 | 9675 | TTGACCCGGGAATAGGAGACAGGCTCCTAAATCTCATAAAGGGCTCCTATCTTGCTTAAACCAGACAAGGCAGAAATC    | 9754 |
| RmRV-trunc1 | 9678 | .....                                                                             | 9757 |
| CmRV-trunc1 | 9755 | ACCTCCTCTTGCTGGCTAGTCTAGCAACAGGCCCTCTTATTACGAAGGCATCGCCCTCACTAATAAATCATTGATTC     | 9834 |
| RmRV-trunc1 | 9758 | .....C.....                                                                       | 9837 |
| CmRV-trunc1 | 9835 | CACCAATCCTACTGGATGTGCTGGGAACAACAATAAACTGACCTGGCTGAAGTTTCTGGGGTGGGAACCTGTATAG      | 9914 |
| RmRV-trunc1 | 9838 | ..AT.....                                                                         | 9917 |

env

gag-pol



|             |       |                                                                                  |       |
|-------------|-------|----------------------------------------------------------------------------------|-------|
| CmRV-trunc1 | 12395 | CCCCAGCTGACTCTGGCCGGGTAGAATGTCCAAACGTGCCCAAAGACTCGACTCTTGGCTTCATTGTCTCCCGCGTTCTG | 12474 |
| RmRV-trunc1 | 12381 | .....                                                                            | 12460 |
| CmRV-trunc1 | 12475 | GGTTTCTGGAGTGC GCGGGATTGGACAGGCCACAAACATATGAGATTATCTGCAGCCAGAGATAAAAAGCCGTTTCTGG | 12554 |
| RmRV-trunc1 | 12461 | .....                                                                            | 12540 |
| CmRV-trunc1 | 12555 | TATCAGCAAATGAGTTTAAGACACAACCCATTAGAGTTTCTGTGGCGCAATCGGTTAGCGTGTCCGCTGTTAATCATAA  | 12634 |
| RmRV-trunc1 | 12541 | .....                                                                            | 12620 |
| CmRV-trunc1 | 12635 | AGGTTGATGGTTCAAGCCCACCCAGGGACGGTGCCCTTTATTTTT-TTTTTTTTTTGTTTTTTTTTTTTTTTTGA      | 12713 |
| RmRV-trunc1 | 12621 | .....A.....T.....G...G.....-..                                                   | 12697 |
| CmRV-trunc1 | 12714 | CGGAGTCTCGCTCTGTCGCCAGCCAGGCTGGAGTGCAGTGGCGCGATCTCGGCTCACTGCAAGCTCCGCTCCCGGGT    | 12793 |
| RmRV-trunc1 | 12698 | .....                                                                            | 12777 |
| CmRV-trunc1 | 12794 | TCACGCCATTCTCCTGCCTCAGCCTCCCGAGTAGCTGGGACTACAGCGCCACAAACCGCCCGGCTAATTTTTTGTAT    | 12873 |
| RmRV-trunc1 | 12778 | .....                                                                            | 12857 |
| CmRV-trunc1 | 12874 | TTTTAGTAGAGACGGGGTTTACCGTGGTTTCGATCTCCTGACCTTGTGATCCGCCCGCCTCGGCTCCCAAAGTGCTGG   | 12953 |
| RmRV-trunc1 | 12858 | .....G.....                                                                      | 12937 |
| CmRV-trunc1 | 12954 | GATTACAGGCGTGAGCCACCGCGCCCGCGGTCCCTTTATTTAAGCAAGATTACGCTTCTGTTTAAAGACTCTAAT      | 13033 |
| RmRV-trunc1 | 12938 | .....                                                                            | 13017 |
| CmRV-trunc1 | 13034 | CCTGGGAATCCTCCGGACCTCTACTAGCTTTAAATCAGATGCCAAAATATGCTGAGCGAAGGCTCAAGTTCCATGGAAG  | 13113 |
| RmRV-trunc1 | 13018 | .....                                                                            | 13097 |
| CmRV-trunc1 | 13114 | TCCTAAAACAGGAATATTTTCAGCAAAGTAATTTTCAATAGAGCCTGAGCCTGGGGCTTCAGAGCTTACCCCATATCCA  | 13193 |
| RmRV-trunc1 | 13098 | .....                                                                            | 13177 |
| CmRV-trunc1 | 13194 | CTGCACCTATTCATCACTTCTGAAGCTAGGTTTTACAATTGCACATTTCTGGAAATC                        | 13253 |
| RmRV-trunc1 | 13178 | .....                                                                            | 13237 |

**Figure S12. Alignment of the nucleotide sequence between CmRV-trunc1 and RmRV-trunc1.** The proviral sequences with the flanking sequences, 5' and 3' LTRs, *gag*, *pol*, and *env* genes are shown. Flanking 4-bp target site duplication (TSD) sequences are shown in gray. Dots indicate identical nucleotide sequences, and dashes indicate the missing nucleotides. Nucleotide sequences encoding Env are highlighted in green.

5' flanking

|            |      |                                                                                    |      |
|------------|------|------------------------------------------------------------------------------------|------|
| PNRC2-BoRV | 1    | GAGCTTGAAGTCAGTAAGTAGCGGCTGCGCTAAGGGCGCGGCCATGTTGGTGGCCGCGCTCCCCATTGTTGGGGGAAGGA   | 80   |
| PNRC2-ChRV | 1    | .....                                                                              | 80   |
| PNRC2-BoRV | 81   | GGCGAGCGGAGGCGAGATCCGGGTAACCCGGGCGGGCGGGCGGTCGGTCCGGTCACGGGCGGTTCGACGCGCCGCGACCC   | 160  |
| PNRC2-ChRV | 81   | .....                                                                              | 156  |
| PNRC2-BoRV | 161  | CTGCGGCTCCCAGAGATGGGGCCACTGGGAAGCCAAAGCCCTTGTGGCGTCGGAGGAGCGTTTTCCGGGTTTCGAGTTGT   | 240  |
| PNRC2-ChRV | 157  | .....                                                                              | 236  |
| PNRC2-BoRV | 241  | GAATGACTCACAGTCCGAAATGGCAATTTATTTAGGGTTGTTTATCTGTTTGAAGGCTCTCTTACCCCTTTGAAAGGA     | 320  |
| PNRC2-ChRV | 237  | .....                                                                              | 316  |
| PNRC2-BoRV | 321  | GGGGGCTTAACATTTTGGTAACCTATTTTCTTGGAAACATCAAATTAACCAAAACCTTGAAAGTTGAGCTGTTCCCTCTA   | 400  |
| PNRC2-ChRV | 317  | .....C.....                                                                        | 396  |
| PNRC2-BoRV | 401  | GGGAGACATTTTATATATTTAAGATGGGCTTAGACTGTAGGGCTTGTGAGAACTTATTTTAAGACGGGAGGAGGCGA      | 480  |
| PNRC2-ChRV | 397  | .....                                                                              | 476  |
| PNRC2-BoRV | 481  | GAGTGTTCATAACCAAAGGAAACACTGCGTGATGTCTACATGTTCCAAGAGACTGAAAATGGATGTGATGAGAAACCATA   | 560  |
| PNRC2-ChRV | 477  | .....                                                                              | 556  |
| PNRC2-BoRV | 561  | GAGAAAATACAGCCACTAAACACCAGATGGCCAGGAGTCAGGGTGTGTCAATGGCTATCATAAACACCAGATGCCCAGG    | 640  |
| PNRC2-ChRV | 557  | .....                                                                              | 636  |
| PNRC2-BoRV | 641  | GTAAGACAGGAGCCCCCCCCCGCCCTTGTTCGCGAACTAAAGCAGAAAAACATTCCAGGAAATACCTCCTCCCGCCT      | 720  |
| PNRC2-ChRV | 637  | .....-                                                                             | 715  |
| PNRC2-BoRV | 721  | ATAAGCCCTGACCAGCCCTGACCAACAGTGTGAGACAGTAGCTCAGACCATAATAGAACCAATCAGTTACTTCCA        | 800  |
| PNRC2-ChRV | 716  | .....                                                                              | 795  |
| PNRC2-BoRV | 801  | AACCTCGCGCCAAAAAAGTTCAAATGTGTAACCAATCAGCTTATGTAACTCCCCCTGTTGAATTTGTGGTTTTT         | 880  |
| PNRC2-ChRV | 796  | .....                                                                              | 875  |
| PNRC2-BoRV | 881  | GCCTTTATAAGCAGTCTGTAACAATCATTGCGGGTCTCCTGGCCTTATGTGCTGGGACCCCTAGCGCGCTAGTAATAAT    | 960  |
| PNRC2-ChRV | 876  | .....                                                                              | 955  |
| PNRC2-BoRV | 961  | AGTGTCTCTTGTCTGTGATCTCTGTGTCGATGGTCTCTGCGCGCGGCCCGTCCCAGGAGGAATCTTGTGAGTAAGTT      | 1040 |
| PNRC2-ChRV | 956  | .....                                                                              | 1035 |
| PNRC2-BoRV | 1041 | CCAACATTTGGGGGCTCGTCCGGGATTGGTCCGCCCTGACGACCCCGACCCGCACGGGGAAGACCCTCGGCCCGGG       | 1120 |
| PNRC2-ChRV | 1036 | .....                                                                              | 1115 |
| PNRC2-BoRV | 1121 | CCATCGACTGACGACCAGGCACCCCTCAGTACTTTCGTTTTTGTGTTGTTGTCGTCATTTGCGTTGCCGCTAAACCGGAT   | 1200 |
| PNRC2-ChRV | 1116 | .....                                                                              | 1194 |
| PNRC2-BoRV | 1201 | GAGTACTCAGTCTGTATAAGTGTGGAAGGGGGCAGACGTGCCAGCACCTTCCACTTACGCCCCGGGGATGCCTTG        | 1280 |
| PNRC2-ChRV | 1195 | .....                                                                              | 1274 |
| PNRC2-BoRV | 1281 | CGGTTGTCTGGAGGAAAACAGGATTCGTGTCAGTCTCCTCACCTCTGAAGGCAGGTTCTCCCTGCCATCTGAATCCTTC    | 1360 |
| PNRC2-ChRV | 1275 | .....                                                                              | 1354 |
| PNRC2-BoRV | 1361 | GTAGGCTCTGGCGCCGATCCCTCGTACGCGGCTTCTCTGTGTGTGTGAGTCTCCGCTTATATCTTTGTTCTCCTTGT      | 1440 |
| PNRC2-ChRV | 1355 | .....G.....                                                                        | 1434 |
| PNRC2-BoRV | 1441 | TCTGTCTATCTGTGCGTTAAAGACTTTAGATACAACATATGGGACAGACACTGACGACTCCTCTATCTTTGACCCCTGACTC | 1520 |
| PNRC2-ChRV | 1435 | .....                                                                              | 1514 |
| PNRC2-BoRV | 1521 | ACTTCCCTGACGTACGGGACGAGCCACAATCTCTGTGAAAATTCGCAAAGGGCGATGGCAAGCCTTCTTTCTGCCTC      | 1600 |
| PNRC2-ChRV | 1515 | .....                                                                              | 1594 |
| PNRC2-BoRV | 1601 | TTCTGAATGGCCACCCTCGGCGTTGGGTGGCCCCAAGGCGGACTTTTGACCTCTCAATCATCTTACAGGTCAAGATAA     | 1680 |
| PNRC2-ChRV | 1595 | .....T.....                                                                        | 1674 |
| PNRC2-BoRV | 1681 | AAGTGTGATGGATCCAGGGCCACGCGCCAGCCTGACCAGGTGGCCTATATCATCACCTGGGAAGACCTGGTCCGGGATCCC  | 1760 |
| PNRC2-ChRV | 1675 | .....                                                                              | 1754 |
| PNRC2-BoRV | 1761 | CCCCATTGGGTGAAGCCCTTCCCTCCCTCAGCTCCCCCTTCCAGTCGACCCCTCTCGCCTTGAAGCCCCCGAAACCA      | 1840 |
| PNRC2-ChRV | 1755 | .....                                                                              | 1834 |
| PNRC2-BoRV | 1841 | AACCCCGTCCCCCGAAACCTGTCTCCCGGATGAGGGTCAGAGGGACCTCTCTCTTAGACCCCTCCCTCTCCGC          | 1920 |
| PNRC2-ChRV | 1835 | .....T.....                                                                        | 1914 |
| PNRC2-BoRV | 1921 | CTCACAATCCCCTCCTTAACCCCTCCTTACCCTCGCCCTCAACCCCGCGTGTCTCTGCCCTTCTACCACCCCTT         | 2000 |
| PNRC2-ChRV | 1915 | .....                                                                              | 1994 |
| PNRC2-BoRV | 2001 | CGGCTCTACTCTTTCTCCAACCTCTTTTCCACCCCTCTCTGATCCCATCC---CCTCCGGCCCCGCCCCAAGTACC       | 2077 |
| PNRC2-ChRV | 1995 | .....CCT.....                                                                      | 2074 |
| PNRC2-BoRV | 2078 | CCTCAGACCCCGCCTCAGACACCCCGCTCCGCTTACGGTGGGCCAAGGACCTGGCGACCAGTCCACCTGGCAGTCTCT     | 2157 |
| PNRC2-ChRV | 2075 | .....C.....                                                                        | 2154 |
| PNRC2-BoRV | 2158 | CCTTTTCCCTCCGCACCGTAAATCGCACGGTCCAGTATTGGCCCTTCTCGGCTCAGAGCTCTACAATGGAAGACCC       | 2237 |
| PNRC2-ChRV | 2155 | .....T.....                                                                        | 2234 |
| PNRC2-BoRV | 2238 | ATAACCCCTTCTCCCAAGATCCGACGGCCCTGACCTCTCTGATAGAATCCATTCTCTCACTACCAACCCACCTGG        | 2317 |
| PNRC2-ChRV | 2235 | .....                                                                              | 2314 |
| PNRC2-BoRV | 2318 | GATGACTGTCAACAGCTCTTACAGTTCTTCTGACCACAGAAGAGGCAACGAGTCTCTCGAGGCCGAAAAATGT          | 2397 |
| PNRC2-ChRV | 2315 | .....                                                                              | 2394 |
| PNRC2-BoRV | 2398 | GCCAGGGCCAGGAGGACTCCTGACCCAACCTCCCAACGAAAATAGATGAGGGATTTCCCTCACCCGCTGGATTGGGACT    | 2477 |
| PNRC2-ChRV | 2395 | .....C.....                                                                        | 2474 |

5' flanking ← → 5' LTR

Target site duplication

5' LTR ←

→ gag-pol

|            |      |                                                                                   |      |
|------------|------|-----------------------------------------------------------------------------------|------|
| PNRC2-BoRV | 2478 | ATGAAACAGCAACAGGTAGGGAGAGTCTCTGAATCTATCGCCAGGCTCTGTTGGCAGGTCTCAAAGGGGCCGAAAGCGC   | 2557 |
| PNRC2-ChRV | 2475 | .....C.....                                                                       | 2554 |
| PNRC2-BoRV | 2558 | CCCACCAATTTGGCTAAGGTAAGAATACTACTCAGGAAAAGAACGAAAGCCCGGAGCCCTTCATGGAAAGGCTCCCTAGA  | 2637 |
| PNRC2-ChRV | 2555 | .....                                                                             | 2634 |
| PNRC2-BoRV | 2638 | GGGGTTTCGAATGTACACTCCATTCGATCCCGAGGCCCCGGAGCACAAAGGCCACCGTAGCTATGTCATTCATAGACCAGG | 2717 |
| PNRC2-ChRV | 2635 | .....                                                                             | 2714 |
| PNRC2-BoRV | 2718 | CAGCGCTAGACATAAAGGGAAAGCTCCAAGATTGGACGGGATCCAGACCTATGGGCTGCAAGAATACTAGTAGAGAGCA   | 2797 |
| PNRC2-ChRV | 2715 | .....                                                                             | 2794 |
| PNRC2-BoRV | 2798 | GAAAGAGTTTATAACAAGAGAGAGACTACTGAGGAAAAAGAGCTAGGCTAGCAAAGGAACAGGAGGAACGAGAGGATCG   | 2877 |
| PNRC2-ChRV | 2795 | .....                                                                             | 2874 |
| PNRC2-BoRV | 2878 | ACGAGATTGTAAGAGGGACAGGCATTTAACTAAAACTCTGGCAGCAGTAGTGACAGGAAAGGGCCAGGGAGAGAGGGGG   | 2957 |
| PNRC2-ChRV | 2875 | .....C.....                                                                       | 2954 |
| PNRC2-BoRV | 2958 | GAGAACGAAGCGCCCAAAGTGGATAAAGACCAATGTGCCTATTGTAAGAACGAGGACATTGGATTAAGATTGTCTCT     | 3037 |
| PNRC2-ChRV | 2955 | .....                                                                             | 3034 |
| PNRC2-BoRV | 3038 | AAACGCCCTAAGGACCGGAAGAACCCTGGCCCGCTCTGACCTGGGAGAAGACAGCGATTAGGGGCGTCAGGGCTCCGA    | 3117 |
| PNRC2-ChRV | 3035 | .....T.....A.....                                                                 | 3114 |
| PNRC2-BoRV | 3118 | AG-CCCCCCGAGCCCGGTTAACCTTTCTATAGGGGGCGCCACCACCTTTCGGTGGACACCGGGGCCAGCAATT         | 3196 |
| PNRC2-ChRV | 3115 | ..C.....                                                                          | 3194 |
| PNRC2-BoRV | 3197 | CAGTTTTGACAAAAGCAGGTGGGCCCTTTCATCCACACCTCTGGGTCGAAGGAGCAACAGGAAGGAGCTACACAAG      | 3276 |
| PNRC2-ChRV | 3195 | .....                                                                             | 3274 |
| PNRC2-BoRV | 3277 | TGGACCACCCACCGAACAGTAAACCTTGGAAAAGGTATGGTACTATTCTTCTTAGTAGTACCTGAATGCCCATATCC     | 3356 |
| PNRC2-ChRV | 3275 | .....                                                                             | 3354 |
| PNRC2-BoRV | 3357 | CCTTCTGGGGCGGATCTGTTGACCAAGCTCGGAGCCAGATACATTTCTCGGAGAGAGGGGCCAGGTGCTGGGTGAGG     | 3436 |
| PNRC2-ChRV | 3355 | .....                                                                             | 3434 |
| PNRC2-BoRV | 3437 | ATGGTCAGCCTATACAAATTTGACCGTATCCTTGCAAGATGAGTACCGGCTTTTCGAGACTCCTATCTTCACCAGCCCT   | 3516 |
| PNRC2-ChRV | 3435 | .....C.....                                                                       | 3514 |
| PNRC2-BoRV | 3517 | CCCGATAACTGGCTGCAAGAATTTCCCCAGGCTTGGGCAGAGACAGGGGACTTGGACTGGCAAAATTTCAAGCCCTGAT   | 3596 |
| PNRC2-ChRV | 3515 | .....T.....T.....C.....                                                           | 3594 |
| PNRC2-BoRV | 3597 | TATAGTTGACCTCAAACCCACCGCAGTGCCCGTGTCCATTAAGCAATACCCCATGAGCCGAGAAGCCCGTATGGGCATCC  | 3676 |
| PNRC2-ChRV | 3595 | .....                                                                             | 3674 |
| PNRC2-BoRV | 3677 | AACAGCACGTTAATAAATTTCTGGAATTAGGGGCTTACGGCCATGCCGCTCACCTTGAATACGCCCTCTTCCGGTA      | 3756 |
| PNRC2-ChRV | 3675 | .....T.....T.....                                                                 | 3754 |
| PNRC2-BoRV | 3757 | AAGAAACCTGGGACCCAGATTATAGGCCCGTCCAGGACTTGAGAGAAATTAATAAGAGAACCATGGACATACATCCAC    | 3836 |
| PNRC2-ChRV | 3755 | .....                                                                             | 3834 |
| PNRC2-BoRV | 3837 | AGTCCCAACCCCTTACAACTGCTCAGTACCTTGAGACCAGACCACAACCTGGTATACAGTACTAGACCTAAAAGATGCAT  | 3916 |
| PNRC2-ChRV | 3835 | .....                                                                             | 3914 |
| PNRC2-BoRV | 3917 | TCTTTTGCTTACCCCTGGCTCCCAAGCCAAAGAGCTTTTGCCTTTGAATGGAGGGACCCTGAGAGGGGAATCTCAGGC    | 3996 |
| PNRC2-ChRV | 3915 | .....                                                                             | 3994 |
| PNRC2-BoRV | 3997 | CAATTAACTTGGACTCGGCTTCCCAAGGGTTCAAGAATT---CTACCTCTTTGACGAGGCTCTTACCAGGGACTTGAC    | 4073 |
| PNRC2-ChRV | 3995 | .....CTC.....                                                                     | 4074 |
| PNRC2-BoRV | 4074 | TGATTTTCGCACCCAGCACCAGATTTAACTCTGCTCCAGTATGTAGATGACCTCCTCCTGGCCGCCCACTAAGGGAG     | 4153 |
| PNRC2-ChRV | 4075 | .....                                                                             | 4154 |
| PNRC2-BoRV | 4154 | CCTGCCTACAGGGCACCAGGCAACTGCTCCAGGAGCTCGGAGAAAAAGGATACCGAGCCTCTGCCAAGAAAGCACAAATC  | 4233 |
| PNRC2-ChRV | 4155 | .....                                                                             | 4234 |
| PNRC2-BoRV | 4234 | TGCCAGACTAAGGTAACCTACCTGGGATACATCTTAAGTGAAGGAAAAAGTGGCTCACCCCTGGGCGGATAGAGACTGT   | 4313 |
| PNRC2-ChRV | 4235 | .....                                                                             | 4314 |
| PNRC2-BoRV | 4314 | AGCCCGCATTCCGCCACCTCGGAGTCCCAAGGAGTGCCTGAGTTTCTGGGCTGCCGGTTCTGCCGCTGTGGATAC       | 4393 |
| PNRC2-ChRV | 4315 | .....A.....                                                                       | 4394 |
| PNRC2-BoRV | 4394 | CTGGTTTTGCTGAGTTGGCAGCCCCCTTTATGCCCTCACCAAGGGAACAACCCCTTTACCTGGCTGGAGGAACACCAA    | 4473 |
| PNRC2-ChRV | 4395 | .....                                                                             | 4474 |
| PNRC2-BoRV | 4474 | CAGGCCTTCGAACTTTAAAGAAGGCACTCCTCTCTGCCCCAGCCCTCGGGCTACCTGACACATCCAAGCCTTTTACCCT   | 4553 |
| PNRC2-ChRV | 4475 | .....                                                                             | 4554 |
| PNRC2-BoRV | 4554 | CTATGCAGACGAGAGACGGGGATAGCCAAAGGGTCTTAACCCAAAACTGGGGCCCTGGAAGAGACCGGTAGCCTACT     | 4633 |
| PNRC2-ChRV | 4555 | .....                                                                             | 4634 |
| PNRC2-BoRV | 4634 | TGCTAAGAAATTTGACCCCTGTGGCGGCTGGGTGGCCCCCTTGCCTCCGCATTATGGCAGCCACCGCTATGCTAGTCAA   | 4713 |
| PNRC2-ChRV | 4635 | .....C.....                                                                       | 4714 |
| PNRC2-BoRV | 4714 | GACTCTGTAAGTTAAACCTTGGGCAACCATTGACTGTCTATTACCCGCACGCTTAGAGGCCATAGTGGCGCAGCCCC     | 4793 |
| PNRC2-ChRV | 4715 | .....                                                                             | 4794 |
| PNRC2-BoRV | 4794 | GGACCGTTGGATCACCAACGCTCGTCTAACCCACTACCAAGCCCTACTACTAGACACGGACCGCTCCGCTTTGGCCCTC   | 4873 |
| PNRC2-ChRV | 4795 | .....T.....                                                                       | 4874 |
| PNRC2-BoRV | 4874 | CGGTCACTCTGAATCTGCCACCTTGCTACCTGTACCGGAGTCCCGCTAAGCCCCACGACTGTCGACAAGTGTGGCG      | 4953 |
| PNRC2-ChRV | 4875 | .....                                                                             | 4954 |

|            |      |                                                                                  |      |
|------------|------|----------------------------------------------------------------------------------|------|
| PNRC2-BoRV | 4954 | GAGACCCACGGGACTAGAGAAGACCTCCAGGACTACGAGCTCCCAGACGCAGACCATACTTGGTACACAGACGGTAGCAG | 5033 |
| PNRC2-ChRV | 4955 | .....                                                                            | 5034 |
| PNRC2-BoRV | 5034 | CTTCATGGACGCAGGTACCCGGAGGGCGGGGGCGGGTGTGGATGGACATGCCACGATATGGGCGCAGGCACTGCCTC    | 5113 |
| PNRC2-ChRV | 5035 | .....T.....A.....                                                                | 5114 |
| PNRC2-BoRV | 5114 | CCGGAACGTCTGCTCAAAAAGGCTGAACTAGTGTCTCTAACAAGGCCTTAGAGCTGTCGCAGGGGAAAAAGGCTAACATC | 5193 |
| PNRC2-ChRV | 5115 | .....                                                                            | 5194 |
| PNRC2-BoRV | 5194 | TACACAGACAGTCGGTATGCCTTTGCGACAGCCACACCCATGGGAGCATTTACGAGAGGCGAGGTCTCCTAACATCAGA  | 5273 |
| PNRC2-ChRV | 5195 | .....                                                                            | 5274 |
| PNRC2-BoRV | 5274 | AGGAAAAGAAATCAAAAATAAGGCCGAAATAATCGCCTTATTAAGGCCCTCTTCCTCCCTAAAAAGGTGGCCATAATTC  | 5353 |
| PNRC2-ChRV | 5275 | .....A.....                                                                      | 5354 |
| PNRC2-BoRV | 5354 | ATTGTCTTGGGCATCAAAAAGGACATGACCCCGTCGCCAGGGTACAGGCAAGCTGACCAGGCGGCCAAGCAGGCTGCT   | 5433 |
| PNRC2-ChRV | 5355 | .....                                                                            | 5434 |
| PNRC2-BoRV | 5434 | AGAATATTGACCTTAGTTTCGGAACCAAAAAGGCTGACCGAATACCCCTTCCCCACGTTATACCTACACACCAGAGGA   | 5513 |
| PNRC2-ChRV | 5435 | .....C.....G.....                                                                | 5514 |
| PNRC2-BoRV | 5514 | CCGGGAAGAGCAATAGCCTTAGGAGCCACAGAAAACCAAGAGACTAAGAATTGGGAAAAAGACGGGAAGCAGGTCTCTCC | 5593 |
| PNRC2-ChRV | 5515 | .....T.....                                                                      | 5594 |
| PNRC2-BoRV | 5594 | CACAAAACAGGCCACGGCCATGGTGCAGCAGATGCACGCTGGACACATTTAAGTAGTAAGAACTAAAACCTGCTCATT   | 5673 |
| PNRC2-ChRV | 5595 | .....                                                                            | 5674 |
| PNRC2-BoRV | 5674 | GAAAAGACTGACTTCCTAATCCCCAGGGTCGGGACCTCCTGGAACAAATAACGCTCGTTGCAAGGCCTGCCAACAAAGT  | 5753 |
| PNRC2-ChRV | 5675 | .....                                                                            | 5754 |
| PNRC2-BoRV | 5754 | AAACGCGGGGCCACGCAGTCCCGCGGGGATAAGGACACGGGCAACCGCCTGGGACCTATTGGGAAGTAGATTTTA      | 5833 |
| PNRC2-ChRV | 5755 | .....                                                                            | 5834 |
| PNRC2-BoRV | 5834 | CTGAAATAAAGCCTCACCATGCAGGATATAAATATTTGTTAGTATTGTTAGACACATTTTCAGGATGGGTAGAAGCCTAC | 5913 |
| PNRC2-ChRV | 5835 | .....                                                                            | 5914 |
| PNRC2-BoRV | 5914 | CCCACCCGGCAAGAAACGGCCACGCTAGTGGCCAAGAAGATATTAGAAGAAATTTTCCCAGGTTCCGACTCCCCAAGGT  | 5993 |
| PNRC2-ChRV | 5915 | .....                                                                            | 5994 |
| PNRC2-BoRV | 5994 | AATCGGGTCAGATAATGGGCCAGCCTTCGCTCCAGGTAAGTCAGGACTTGCCAGGATACTGGGGATTGATTGGAAAC    | 6073 |
| PNRC2-ChRV | 5995 | .....                                                                            | 6074 |
| PNRC2-BoRV | 6074 | TTCATTGTGCTTATAGGCCACAGATTCAGGACAGGTAGAACGGATGAATAGAACTATTAAGAGACCTTAACAAAATTG   | 6153 |
| PNRC2-ChRV | 6075 | .....                                                                            | 6154 |
| PNRC2-BoRV | 6154 | ACCTTAGAGACTGGCTTAAAAGATTGGAGACGCTCCTATCCCTAGCTCTCTTGAGAGCCGAAATACGCCTAATCGCTT   | 6233 |
| PNRC2-ChRV | 6155 | .....                                                                            | 6234 |
| PNRC2-BoRV | 6234 | TGGGCTCACCCCTTATGAAATCCTCTATGGGGACCACCCCTTGTCAACCTTGCTTGATTCTTTCGCCCTCTAACC      | 6313 |
| PNRC2-ChRV | 6235 | .....AA.....                                                                     | 6314 |
| PNRC2-BoRV | 6314 | CTAAGACTGACTTGCAAGCTCGACTAGAAGGACTACAGGCGGTGCAAGCCAAATTTGGGCTCCTTTGGGGAAGTGTAC   | 6393 |
| PNRC2-ChRV | 6315 | .....                                                                            | 6394 |
| PNRC2-BoRV | 6394 | CAGCCTGGACACCCACAACCAGTCACTCTTCCAAGTGGGAGACTCCGCTATGTGACAGACATCGCTCCCAAGGATT     | 6473 |
| PNRC2-ChRV | 6395 | .....                                                                            | 6474 |
| PNRC2-BoRV | 6474 | AGAACTCCGGTGAAGGGACCATACATCGTCTCTCACCACACCCACTGCCGTGAAAAGTTGACGGGGTCGCCCTGGA     | 6553 |
| PNRC2-ChRV | 6475 | .....C.....                                                                      | 6554 |
| PNRC2-BoRV | 6554 | TCCACGCATCCCAGTAAAAGCCGCTCCGAGGGTGCCAGAAATCAGCATCGCCTGAGAAATGGAGACTTCGTCGCTCCAGG | 6633 |
| PNRC2-ChRV | 6555 | .....                                                                            | 6634 |
| PNRC2-BoRV | 6634 | GACCCCTCAAGATAAGACTTTCCCGTGTCTAACCCCTCACCTACTGTTAACTCTTTCTCCTCCCTGGGTTGTCCGGAAGC | 6713 |
| PNRC2-ChRV | 6635 | .....                                                                            | 6714 |
| PNRC2-BoRV | 6714 | AGCAACCCCCACCAACCCCTATCGATTGACTTGGCAAATAACTAATTTTAAAACCCATGAAGTCCCAACGAGACTTCACA | 6793 |
| PNRC2-ChRV | 6715 | .....C.....                                                                      | 6794 |
| PNRC2-BoRV | 6794 | TGTAGCCCTTTAAATACCTGGTTCCTGACCTCTACTTCAATCTTGACAAAATAGCCATGACAGATGAAATGGAGGGTG   | 6873 |
| PNRC2-ChRV | 6795 | .....T.....                                                                      | 6874 |
| PNRC2-BoRV | 6874 | GTGAGTGGAGAAAAGCAAGCGAGAAGAGTCTCCCTAAGTCGAAACGGGTTTATGTCTGCCCTGGATTCCGGACGGGACCG | 6953 |
| PNRC2-ChRV | 6875 | .....                                                                            | 6954 |
| PNRC2-BoRV | 6954 | ATGAAAAAGACCTGTGGTGAATAATGTCTCTGTACTGTGCAAGTTGGTCATGTGTAACAACTAATGATGGGGAATGGAA  | 7033 |
| PNRC2-ChRV | 6955 | .....C.....                                                                      | 7034 |
| PNRC2-BoRV | 7034 | ATGAAAAACCAACCTGGTATTTAACCATGTCTATGTCCAGCCTGCACCAGGACACGGTATTCCGGCCACCTGTAACC    | 7113 |
| PNRC2-ChRV | 7035 | .....T.....                                                                      | 7114 |
| PNRC2-BoRV | 7114 | TAAATCCGTGTCAAATTTGAGGAGGCGCAAAAACCTGACCCCGGTGGACAACCGGACTAATTTGGGGTCTAAATTTATAC | 7193 |
| PNRC2-ChRV | 7115 | .....C.....                                                                      | 7194 |
| PNRC2-BoRV | 7194 | CAAATCCGGCAGCTGGACTCCCTATCCAAATTAGACTACTAGTTAACCCGGTCTCAGCCTCGTCCCGGTAGGGCCAAA   | 7273 |
| PNRC2-ChRV | 7195 | .....                                                                            | 7274 |
| PNRC2-BoRV | 7274 | CCCGTTCTAACAGGGAGAGCACCTTCTCAGTGAGGGAGCCGGCAGAAAAGTCCCGACCACCGTTTCCCATCCAAATCCC  | 7353 |
| PNRC2-ChRV | 7275 | .....                                                                            | 7354 |
| PNRC2-BoRV | 7354 | CATCCCATCCGGCCTCCCGGGCCTACTCGCCTGCCTCCCGACCCGAAACAAGCAATAGACTCTTCAACCTCATCAGA    | 7433 |
| PNRC2-ChRV | 7355 | .....                                                                            | 7434 |

→ *env*

*gag-pol* ←

|            |      |                                                                                   |      |
|------------|------|-----------------------------------------------------------------------------------|------|
| PNRC2-BoRV | 7434 | GGCGCTTACCTCGCCCTGAACCAGACAAAGCCTGAATCTACCACCTCCTGCTGGCTCTGCCTGGCCACAGGCCCCCTTA   | 7513 |
| PNRC2-ChRV | 7435 | .....C.....                                                                       | 7514 |
| PNRC2-BoRV | 7514 | CTATGAAGGTATTGCCTCTGTTAGTAATCTTACTAACTCCACTAGTCATCTCGATGTGCATGGGACCAGCACAGAAGAAC  | 7593 |
| PNRC2-ChRV | 7515 | .....                                                                             | 7594 |
| PNRC2-BoRV | 7594 | TTACCCTAGCAGAGGTGTGAGGGTCGGGAACCTGTATAGCCGGGTGCCCCAGTCACCAACATCTCTGTAATAGAACC     | 7673 |
| PNRC2-ChRV | 7595 | .....                                                                             | 7674 |
| PNRC2-BoRV | 7674 | CTGGCAGTACCAGAACTAGTCACTATCTAATACCCTCCGGACCAGACTGGTGGGCTTGCAAAACCGACTTACCCCTTG    | 7753 |
| PNRC2-ChRV | 7675 | .....                                                                             | 7754 |
| PNRC2-BoRV | 7754 | TATATCCGCAGCTGTCTTCAACGACAGTGAAGATTATTGTATATTAGTACAAGTTGTGCCCCAGTTTATTATCAAACCTG  | 7833 |
| PNRC2-ChRV | 7755 | .G.....                                                                           | 7834 |
| PNRC2-BoRV | 7834 | GAGAGTCTTTTGAATCCCAGTTTGAGCAAAAAACCTCACTAGAATAAAGAGAGAACCTGTTTCCCTCACCTCGCTGTT    | 7913 |
| PNRC2-ChRV | 7835 | .....                                                                             | 7914 |
| PNRC2-BoRV | 7914 | ATGCTAGGATTAGGAGTAGCGGCTGGGTCGGGACAGGAACCGCGCATTAGTGCGTGGCAGCTACCACCTACAACAACCT   | 7993 |
| PNRC2-ChRV | 7915 | .....                                                                             | 7994 |
| PNRC2-BoRV | 7994 | CAGGGCAGCTGTAGATGAAGACCTCAGGGCCATAGAACACTCCATTACCAAACCTTGAAGAATCTCTAACCTCCCTGTGCG | 8073 |
| PNRC2-ChRV | 7995 | .....C.....                                                                       | 8074 |
| PNRC2-BoRV | 8074 | AAGTAGTACTCCAAAATCGACGGGACTAGACATAATTTTCTAAAAGAGGGCGGCTCTGTGCAGCCCTTAAAGAGCAG     | 8153 |
| PNRC2-ChRV | 8075 | .....                                                                             | 8154 |
| PNRC2-BoRV | 8154 | TGTTGTTTTTACGCTGATCATTGAGGAGTAGTTAAAGACTCTATGGCAAACTTAGAAAAAGACTAGATGATAGACAAAA   | 8233 |
| PNRC2-ChRV | 8155 | .....                                                                             | 8234 |
| PNRC2-BoRV | 8234 | AGAGAGAGAATCCCAACAAAGCTGGTTTGAACCTTGGTACAACCAATCCCCTGGTTTGTACTCTCATTCCACCATCC     | 8313 |
| PNRC2-ChRV | 8235 | .....                                                                             | 8314 |
| PNRC2-BoRV | 8314 | TAGGGCCCTGATCCTGCTTATGCTCATTTTAACTTTTGGGCCCTGCATTTTAAACCGTTTGGCTTACCCTAATTAAGAT   | 8393 |
| PNRC2-ChRV | 8315 | .....                                                                             | 8394 |
| PNRC2-BoRV | 8394 | AAATTAACATAGTGCATGCTATGATCCTGACTCAACAGTACCAGGCAGTCAAGACTGACGAAGAGACTCAAGATTGAGC   | 8473 |
| PNRC2-ChRV | 8395 | .....T.....                                                                       | 8474 |
| PNRC2-BoRV | 8474 | CTCTAAGTCACAAAAAGAGGGGAATGAGAAACCATAGAGAAAATACAGCCACTAAAACACCAGATGGCCAGGAGTCAG    | 8553 |
| PNRC2-ChRV | 8475 | .....                                                                             | 8554 |
| PNRC2-BoRV | 8554 | GGTGTGCAATGGCTATCATAAACACCAGATGCCAGGGTAAGACAGGGAG-CCCCCGCCCTTGTTCGGGAACATA        | 8632 |
| PNRC2-ChRV | 8555 | .....C.....                                                                       | 8634 |
| PNRC2-BoRV | 8633 | AGCAGAAAAACATTTCCAGGAAATACCTCCTCCCGCTATAAGCCCTGACCAACCAGTGTGAGACAGCTAGCTCAGACC    | 8712 |
| PNRC2-ChRV | 8635 | .....                                                                             | 8714 |
| PNRC2-BoRV | 8713 | ATAATTAGAACCAATCAGTTACTTCCAACCTCGCGCCCAAAACTGTTCAAATGTGTAACCAATCAGCTTATTGTAAC     | 8792 |
| PNRC2-ChRV | 8715 | .....                                                                             | 8794 |
| PNRC2-BoRV | 8793 | CTCCCGTTTGAATTTGTGGTTTTTGCCTTTATAAGCAGTCTGTAAACATCATTCGGGGTCTCCTGGCCTTATGTGCTGG   | 8872 |
| PNRC2-ChRV | 8795 | .....                                                                             | 8873 |
| PNRC2-BoRV | 8873 | GGACCCTAGCAGCTAGTAATAAATAGTGTCTCTTTGCTGTGATCTCTGTGTCGAGTGGTCTCTGGCGGGCCCGCTCC     | 8952 |
| PNRC2-ChRV | 8874 | .....                                                                             | 8953 |
| PNRC2-BoRV | 8953 | TGAGGCAGGAATCTGAGTAAGGTTCCAACAGTGCATGTGGAAAGATTGGCAAATCTGCTGGGAGTTAAAAACAT        | 9032 |
| PNRC2-ChRV | 8954 | C.....                                                                            | 9033 |
| PNRC2-BoRV | 9033 | GGTCTCTTTAGAAAATCCGCCTGAAGCCAATTTTGTATGACTCAACATTTAACACTTCTTGATTTTATATGCGAGA      | 9112 |
| PNRC2-ChRV | 9034 | .....C.....                                                                       | 9113 |
| PNRC2-BoRV | 9113 | GAATCTGAAGGTCTTTCCAGGAAAAGATAAAGATAAACTTACTGCGGACTTGGAGACACTTACAAAAATCCCCAG       | 9192 |
| PNRC2-ChRV | 9114 | .....T.....                                                                       | 9193 |
| PNRC2-BoRV | 9193 | GAGTGACTGGATCTCAAGGGTGA--AGTTTTTTAAATGGTCGTGGTTATAAGGTCAAAGAAAGCCATCTTACGAGAAAT   | 9270 |
| PNRC2-ChRV | 9194 | .....AG.....                                                                      | 9273 |
| PNRC2-BoRV | 9271 | TTTCTACCTTTTAGTTTCAAGAGTACGCTTCTTTACAGTCAACGATTTTCGTAGTAAATCTAAATGATCACTTTCTCAAC  | 9350 |
| PNRC2-ChRV | 9274 | .....                                                                             | 9353 |
| PNRC2-BoRV | 9351 | GTGTTTTTGAATAATAAAGTAATCTTTACTTTTCTAGCTAGGACTTCTCTCAAACCTGTGTGCTGAGGAGACTCAGATG   | 9430 |
| PNRC2-ChRV | 9354 | .....                                                                             | 9428 |
| PNRC2-BoRV | 9431 | TTGGCCTCAGCTCCTAGGCTGAACCTCAGCAGATCGGCCATGAAAACCTTCTGTATTGAGACAAAGGAAGGGATCTGTGAG | 9510 |
| PNRC2-ChRV | 9429 | .....                                                                             | 9508 |
| PNRC2-BoRV | 9511 | AAAGCAACACTTGTATCTTGGGCTTGGCAGCAAGGAAGGACAGGTAGTGGAGATCCTACAATCTGAAAAGCAGACTG     | 9590 |
| PNRC2-ChRV | 9509 | .....G.....                                                                       | 9588 |
| PNRC2-BoRV | 9591 | AAAGTAATCATCATAATGGGCAACATTTTATGATGGAACCATCTAAACCAATTGTTTTTTTAAATAGATTATG         | 9670 |
| PNRC2-ChRV | 9589 | .....                                                                             | 9668 |
| PNRC2-BoRV | 9671 | CAGATTTGTGGTAAAGCTCATTTTTCTTAGGGAAGGTATAACAATAAAGTTGTGCATATATTGAAGTCTGAACGGCTTG   | 9750 |
| PNRC2-ChRV | 9669 | .....                                                                             | 9748 |
| PNRC2-BoRV | 9751 | CTTTTTGAGTTTAAAGCAGCTGAATAGCCCTGTTATTGAGTCTTGTCCAAAATATCTGGAGTTATAAGTTGGAGCCATAG  | 9830 |
| PNRC2-ChRV | 9749 | .....                                                                             | 9828 |
| PNRC2-BoRV | 9831 | AAGCTTCTTAAAGATTTTGAACCTTTTCTTAATGGAATTTTACTCAATATTGTTTCCATTCACTTGTAGGTGACAAAGAA  | 9910 |
| PNRC2-ChRV | 9829 | .....                                                                             | 9908 |

→ 3'LTR

env ←

3' LTR ← → 3' flanking

Target site duplication



|            |       |                                                                                  |       |
|------------|-------|----------------------------------------------------------------------------------|-------|
| PNRC2-BoRV | 9911  | GCTGAAGATGGGTGGTGGAGAGAGGTATAACATTCAGCCCTCAATCTAGAAATGTTAGCAAGAACCAACAACAGCTTA   | 9990  |
| PNRC2-ChRV | 9909  | .....T.....                                                                      | 9988  |
| PNRC2-BoRV | 9991  | ACAGACAGAAGACCAAGGAACAGAATTCAGATGAAGATTGTTTCATAAGAAAAAGAAAGAGGACATGGTTATAACTCA   | 10070 |
| PNRC2-ChRV | 9989  | .....                                                                            | 10068 |
| PNRC2-BoRV | 10071 | TCAGCAGCTGCCTGGCAGGCCATGCAAAAATGGGGGAAGAACAAAAATTTCCAAATAATCAAAGTTGGAATTCAGCTT   | 10150 |
| PNRC2-ChRV | 10069 | .....                                                                            | 10148 |
| PNRC2-BoRV | 10151 | ATCAGGTCCCAGCTTACTTTTTAAATCTCAAGCTAATCAGAACTATGCTGGTGCCAAATTTAGTGAGCCGCCATCACCAA | 10230 |
| PNRC2-ChRV | 10149 | .....                                                                            | 10228 |
| PNRC2-BoRV | 10231 | GTGTTCTTCCCAAACCACCAAGCCACTGGGTCCTGTTTCCTTTAATCCTTCAGATAAGGAAATAATGACATTTCAACTT  | 10310 |
| PNRC2-ChRV | 10229 | .....                                                                            | 10308 |
| PNRC2-BoRV | 10311 | AAAACCTTACTTAAAGTACAGGTATAAAATAAGACAAATGTTTAAATTTAGTTATGTTACGGATAGTTGTCAATGGTC   | 10390 |
| PNRC2-ChRV | 10309 | .....                                                                            | 10388 |
| PNRC2-BoRV | 10391 | TGAAACAAATTCGCTAGGGAATCTATTTGTGTAGAACTAATTAATGTAAA                               | 10440 |
| PNRC2-ChRV | 10389 | .....T.....                                                                      | 10438 |

**Figure S13. Alignment of the nucleotide sequence between PNRC2-BoRV and PNRC2-ChRV.** The proviral sequences with the flanking sequences, 5' and 3' LTRs, *gag*, *pol*, and *env* genes are shown. Flanking 4-bp target site duplication (TSD) sequences are shown in gray. Dots indicate identical nucleotide sequences, and dashes indicate the missing nucleotides. Nucleotide sequences encoding Env are highlighted in green.

5' flanking

|                      |      |                                                                                    |      |
|----------------------|------|------------------------------------------------------------------------------------|------|
| CmRV1_2              | 1    | CTGGTCTTGATTTCCCTTGACCTCAGGCGATCCACCACCTCCGCCCTCCTCAGAAGTGTGGGATTACAGGTGTGAACCACT  | 80   |
| Rhesus macaque chr14 | 1    | .....                                                                              | 80   |
| CmRV1_2              | 81   | GCACCCCTGCCCTGAAGTACTTTTCTAAAGCTTTTTATTCTTTGTTACCAGAAAGTCTTCATTTGCATAGACCAATTCCTCT | 160  |
| Rhesus macaque chr14 | 81   | .....                                                                              | 160  |
| CmRV1_2              | 161  | GATCTGCTGGCTCCAGAATTCAACTACTGTACTCCTTAGAGCAACTGACACCCTCTC-----TCTTTTTTTTTTTTTTTT   | 234  |
| Rhesus macaque chr14 | 161  | .....TTTTTT.T.....                                                                 | 240  |
| CmRV1_2              | 235  | GAGACGGAGTCTTGCTCTGTAGCCAGGCTGGAGTGCAGTGGCCGGATCTCAGCTCACTGCAAGCTCCGCCCTCCCGGGTT   | 314  |
| Rhesus macaque chr14 | 241  | .....C.....                                                                        | 320  |
| CmRV1_2              | 315  | TACGCCATTCTCCTGCCTCAGCCTCCGGAGTAGCTGGGACTACAGGCGCCGCCACCTCGCCCGGCTAGTTTTTTTTTGTA   | 394  |
| Rhesus macaque chr14 | 321  | .....                                                                              | 400  |
| CmRV1_2              | 395  | TTTTTAGTAGAGACGGGTTTACAGGTGTAGCCAGGATGGTCTCGATCTCTTGACCTCGTGATCCGCCCTCTCGGCCCT     | 474  |
| Rhesus macaque chr14 | 401  | .....                                                                              | 480  |
| CmRV1_2              | 475  | CCCAAAGTGTGGGATTACAGTTTTGAGCCACCGCGCCGCCCAACTGACACCCTCTTACACAAAAATGGCAGAAGAG       | 554  |
| Rhesus macaque chr14 | 481  | .....                                                                              | 560  |
| CmRV1_2              | 555  | TCCAAATAGTCTTTCTATTAAGCACCTTGTTCCTTTGGTTTTAAGTTTCTTGCTATGTGTACTCTGGAGAAGTATAGG     | 634  |
| Rhesus macaque chr14 | 561  | .....                                                                              | 640  |
| CmRV1_2              | 635  | AGACTACAAACACCACAAAAAACAATGATTCAGGACTTCAGAGTCTTCCATGGCCATTTCAAGTCTGAAATCTGTAA      | 714  |
| Rhesus macaque chr14 | 641  | .....A.....                                                                        | 720  |
| CmRV1_2              | 715  | CTCTCCTCTCAAATGAAAACAAAAAGGCCATTCAACTTCAGTCTCAGCATTTTACCCCTCTGGCAGGGGCCATCAAA      | 794  |
| Rhesus macaque chr14 | 721  | .....                                                                              | 800  |
| CmRV1_2              | 795  | ACCGTCTCTTCTTCCAACACCACATCATCTCCATCTCCCAAGGGATGACCATCCGACATCCTTAAATCCTAACCTTAAAT   | 874  |
| Rhesus macaque chr14 | 801  | .....                                                                              | 880  |
| CmRV1_2              | 875  | GCCAAATAGTTGTTGGTTTACAGTCTTTTACAAAAGTAAAAAGCTGCAGTCTTTAAGCAAATGAAACTTAAGCAATAA     | 954  |
| Rhesus macaque chr14 | 881  | .....G.....C.....                                                                  | 960  |
| CmRV1_2              | 955  | ATGATCCCATCCACTCTCAGGAGGTACCCTCTGCTTCCCGTCTGTGTTCTCTAGAAACAGATTAACCAAGTCTGTGTA     | 1034 |
| Rhesus macaque chr14 | 961  | .....                                                                              | 1040 |
| CmRV1_2              | 1035 | TAAAGCATATTCTCAGACTTGGCTCAAATTTGCATTTAGCTGTATCTATAAGGCTTCTGGGGCCAGGTGCTGTGGCT      | 1114 |
| Rhesus macaque chr14 | 1041 | .....                                                                              | 1120 |
| CmRV1_2              | 1115 | CATGCCATAATCCCAGCACTTTGGGAGCCGAGGCAGGCAGATCACCTGAGGTCAGGTGTTGAGACCAGACTTGCAAA      | 1194 |
| Rhesus macaque chr14 | 1121 | .....                                                                              | 1200 |
| CmRV1_2              | 1195 | CATGGTGAAAAGCCACTTCTACTGGAAGTACAAAAGTTAGCCAGGTGTAGTGGCAGGCGCTGTAATCCCAGCTACACGG    | 1274 |
| Rhesus macaque chr14 | 1201 | .....                                                                              | 1280 |
| CmRV1_2              | 1275 | GAGACTGAGGTGGGAGAAATCGCTTAAACCCGGGAGACAGAGGTGCGGGGAGCCGAGATTGTGCCACTGCACTCCAGCAT   | 1354 |
| Rhesus macaque chr14 | 1281 | .....                                                                              | 1360 |
| CmRV1_2              | 1355 | GGGTCACAGAGTGAGACTCCATCTCGGAAAAAAGAAAGACTTTGGGAATAAAAACGTCAATATTCTCTAGGACCATTGC    | 1434 |
| Rhesus macaque chr14 | 1361 | .....                                                                              | 1440 |
| CmRV1_2              | 1435 | TTAAGTTTAAAGATGAAACTGCTTTATTATTCAAATCTGGAAATTTGAGAAAAGGAGGATTACCGATAAGCATACTGGGAA  | 1514 |
| Rhesus macaque chr14 | 1441 | .....                                                                              | 1520 |
| CmRV1_2              | 1515 | AACAGGGGTAATCAGGTTGCCCCAGGCAAACTGGAAGTCTGTGGTTACTCTAATTTGTAAGTCTTCTGAATGAGTGCT     | 1594 |
| Rhesus macaque chr14 | 1521 | .....                                                                              | 1600 |
| CmRV1_2              | 1595 | GTTAGAAGAAAAAATTTAGACAAATTTAACAGTGTTTAACAGAGCAAAGAACAATTTAGAACTGGACAGTGCCTGAA      | 1674 |
| Rhesus macaque chr14 | 1601 | .....-CA.....                                                                      | 1679 |
| CmRV1_2              | 1675 | CCGAAAAAGTTTCAGAGTAACTCTAGGGCTGTACCTGATCAGATAATGTTTATTATTATTATTATTATTATGTTTTTTT    | 1754 |
| Rhesus macaque chr14 | 1680 | ..A.....                                                                           | 1759 |
| CmRV1_2              | 1755 | TCTGAGATGGAGTCTTGCTCTGTTGCCAGACTAGAGTTTATTGGCTCAATCTCAGCTCACTGCAACTGTACCTCCTGG     | 1834 |
| Rhesus macaque chr14 | 1760 | .....                                                                              | 1839 |
| CmRV1_2              | 1835 | GTTCAAGCAATTCCTCCTGCCTCAGCCTCCTGAGTAGCTAGAATTCAGGCGTGTGCCACCATGCCTGGCTAACTTTAGTA   | 1914 |
| Rhesus macaque chr14 | 1840 | .....                                                                              | 1919 |
| CmRV1_2              | 1915 | TTTTTAGTAGAGACGGGTTTACCACGTTGCCAGGCTGGTCTCGAACGCTGACCTCAGGTGATCCACCCGCTCAGCC       | 1994 |
| Rhesus macaque chr14 | 1920 | .....                                                                              | 1999 |
| CmRV1_2              | 1995 | TCGCAAAGTGTGGGATTACAGGCGTGAGCCACTGCATCTCAGCCACTGGTGAAGTCTGAGCTGCACTGCTGCACCTTAGC   | 2074 |
| Rhesus macaque chr14 | 2000 | .....G.....C.....                                                                  | 2079 |
| CmRV1_2              | 2075 | CTGGGTAACAAAAAAGAGTAGATAACAGCCTATTTACATGTCCAGTTAGTTATGGTCTAATATGTATGG              | 2154 |
| Rhesus macaque chr14 | 2080 | .....-                                                                             | 2158 |
| CmRV1_2              | 2155 | AGAAGTCTTGGACTGAACTTAAAGTATAACAAGGAGGCAGCTTAAAGCTAAACTTAGCAGTGTAAAACCTCCCATTTTTC   | 2234 |
| Rhesus macaque chr14 | 2159 | .....                                                                              | 2238 |
| CmRV1_2              | 2235 | CCCTCAGTTTTCCCTATCTTTGTCACTCAGCTCCAGTGCACCCCGAGGCTCTCGCTCTGTTGCCAGGCTGGAATGC       | 2314 |
| Rhesus macaque chr14 | 2239 | .....A.....                                                                        | 2318 |
| CmRV1_2              | 2315 | AATGGTCAATCTTGCTCACTGCAACCTTCGCCTCCCGGTTCAAGCGAGTCTCCTGCCTCAGGCTCCCGAGTAGCTGG      | 2394 |
| Rhesus macaque chr14 | 2319 | .....                                                                              | 2398 |
| CmRV1_2              | 2395 | GATTATAGCCGCCGCCACCATACCCAGCTACTTTTTGTATTTTTAGTACTGGCAGGTTTACCATGTTGCCAGGCTA       | 2474 |
| Rhesus macaque chr14 | 2399 | .....                                                                              | 2478 |

|                      |      |                                                                                    |      |
|----------------------|------|------------------------------------------------------------------------------------|------|
| CmRV1_2              | 2475 | GTCTCGAACTCCTGACCTCAGATGATCCACCCACCTCAGCTTTCCAAGGTGCTGGGATTGCAGGGGTGAGCCACCTTGCC   | 2554 |
| Rhesus macaque chr14 | 2479 | .....                                                                              | 2558 |
| CmRV1_2              | 2555 | ACCTGGCCAGAAAAGTCTTTGGAGGCAGTTTTCTCCCTAATTATTCATCTTTCTCAATTAGGATTTCTCTAAACCTGAAT   | 2634 |
| Rhesus macaque chr14 | 2559 | .....G....G.....                                                                   | 2638 |
| CmRV1_2              | 2635 | CTCCTTAAGAGAGAGCTTAAATGTTTGATTTAGAGTGCCTGTTTTAGAAAAGACCTTGGGCAAATTACTTAATCTGTCTGTG | 2714 |
| Rhesus macaque chr14 | 2639 | .....G.....                                                                        | 2718 |
| CmRV1_2              | 2715 | GTGGTTTCCTCACTTGTAAGCAGGTTCTACTATAATACTAACAGCACTTACTTTATAGGGTATTGTGAGAGTAAAAATCA   | 2794 |
| Rhesus macaque chr14 | 2719 | .....A.....                                                                        | 2798 |
| CmRV1_2              | 2795 | GTTCCATATGTGCAAAGTACTCAGAGAACCACCTGACCTAAGTGCCTCGATAATGTTAGCTATTACCTCCTCTAAAAATGTT | 2874 |
| Rhesus macaque chr14 | 2799 | .....T.....                                                                        | 2878 |
| CmRV1_2              | 2875 | GTATTTTATTTTATTTTATTTTACTTTTATAGATGGGGTCTGTCTCTGTGCATCCAGGCTGGAGTCCGGTGGTACAATCTTG | 2954 |
| Rhesus macaque chr14 | 2879 | .....T.....T.....                                                                  | 2958 |
|                      |      | 5' flanking ← → 5' LTR                                                             |      |
| CmRV1_2              | 2955 | GCTTGAAACTAGGCCTCATAAACTTAGAACTAGGCCTCATATAGAAAAAATTAACACCAGGTGGCTCTGGATAGGGTC     | 3034 |
| Rhesus macaque chr14 | 2959 | .....                                                                              | 3038 |
|                      |      | Target site duplication                                                            |      |
| CmRV1_2              | 3035 | CCACCCTGCCTCGATAGGGACCCACCCTGATAGGGTCCACCCCTGCCAATTCGGGAAACAACCTCATGGGGTCCCACCC    | 3114 |
| Rhesus macaque chr14 | 3039 | .....A.....                                                                        | 3118 |
| CmRV1_2              | 3115 | TGCCAATTCGGGGGTCCCACCCCTGCCTCGAAGTTCCCGGAATCAACAACCTCCAGGAAAAAACCTCATAAGGTCCTGCT   | 3194 |
| Rhesus macaque chr14 | 3119 | .....                                                                              | 3198 |
| CmRV1_2              | 3195 | CTAACCAATTAGCATAAGACACCTTGCTCAGGCCATAGCTAGACCCAATCATTTTGCGCCCTTAAGCTTTGTTGAATTC    | 3274 |
| Rhesus macaque chr14 | 3199 | .....                                                                              | 3278 |
| CmRV1_2              | 3275 | GCGCCATAAGCTGTGTTTGAAGTGTGTTTGGCTATATAAACAGCCCTGTAACAAGCAGTCGGGGTCCCAGGGCCAACTTA   | 3354 |
| Rhesus macaque chr14 | 3279 | .....G.....                                                                        | 3358 |
| CmRV1_2              | 3355 | GAGCTTGGGACCTAGTGCCTAGTAATAAACTCTCTGCTGTGAATCTCGTGTGGGTATCCTTCGCGCGGACCCCT         | 3434 |
| Rhesus macaque chr14 | 3359 | .....C.....A.....                                                                  | 3438 |
|                      |      | 5' LTR ←                                                                           |      |
| CmRV1_2              | 3435 | GCCCAGGAGGGAATCGACAGTTCGGTTCACACATTTGGTGCATTTGGCCGGAAAGTGGGGTCTCCGAGGACCCCGACCC    | 3514 |
| Rhesus macaque chr14 | 3439 | .....                                                                              | 3518 |
| CmRV1_2              | 3515 | ATCCGGCGGAGACCCATCTGGCCCGGCCACGGACTGCTGACTGAACGGACCCACAGGTACTTTCGTTTTGTTCTGTCT     | 3594 |
| Rhesus macaque chr14 | 3519 | .....T.....                                                                        | 3598 |
| CmRV1_2              | 3595 | GTCTTGGCCGCTAACTCTGAACTCTGGGAGTACTCTTCTGAATTAAGTGGGGAAGGGGACAGCTGTCCGGCACCT        | 3674 |
| Rhesus macaque chr14 | 3599 | .....A.....                                                                        | 3678 |
| CmRV1_2              | 3675 | TCCCCTACTAGCCCCGGGGACGCCCTGGCAGTAGTCTGGGAGAAGGCTGACGACTCAGTCAGCCTCCTCAATCTGTAG     | 3754 |
| Rhesus macaque chr14 | 3679 | .....                                                                              | 3758 |
| CmRV1_2              | 3755 | GCAGGTCGCCCCGCGTCTGAATATTTGTGATCTTGTGGCACCCTCTCTGGCCGCGGGCTTCTCCTTACTTGTCTG        | 3834 |
| Rhesus macaque chr14 | 3759 | .....                                                                              | 3838 |
|                      |      | gag-pol →                                                                          |      |
| CmRV1_2              | 3835 | GTCCTTATTTTGTACTTTCGTTTTGTCCTTGTATACGTGGACGAAATGGGACAGACGTTGACGACTCCTTTGTCTCT      | 3914 |
| Rhesus macaque chr14 | 3839 | .....T.....                                                                        | 3918 |
| CmRV1_2              | 3915 | AACCTGACTCACTTCCCTGACGTCGGGGCTCGAGCCACCACCTCTCTGTAGAAGTCCGTAAGGGACGATGGAAAAAT      | 3994 |
| Rhesus macaque chr14 | 3919 | .....                                                                              | 3998 |
| CmRV1_2              | 3995 | TCTGCTCGTCCGAATGGCCAACCCTCCATGGGGAATGGCCCCGGGACGGAACATTTAACCTCTCAATATCTTGCAGTT     | 4074 |
| Rhesus macaque chr14 | 3999 | .....T.....                                                                        | 4078 |
| CmRV1_2              | 4075 | AAAGCAAAAGTGTATGGATCCTGGGCCACTCGGACACCAGGACCAGGTGGCTACATAATTATTTGGGAGGATCTGGTCCA   | 4154 |
| Rhesus macaque chr14 | 4079 | .....                                                                              | 4158 |
| CmRV1_2              | 4155 | AAATCCTCCCTCTTGGGTGAAACCCCTTCCCTCCATTCCCTTCCCATCCCAATCTACCTCCTTGCCCTAGAAGCCCCAA    | 4234 |
| Rhesus macaque chr14 | 4159 | .....                                                                              | 4238 |
| CmRV1_2              | 4235 | AGAATCGGAATCTGGACCCGCTAAGCCAGTCTCCAGATGAACCCAGAGGGATCTCCTCCTTCTGACCCCTGCCT         | 4314 |
| Rhesus macaque chr14 | 4239 | .....                                                                              | 4318 |
| CmRV1_2              | 4315 | CCTCCACCTCAGAACCCCTTCTGGGACCTCCACCTTACACTTACCCCTTGCCCCCTGTCTGTCCCCAGCTCTTCCCTC     | 4394 |
| Rhesus macaque chr14 | 4319 | .....                                                                              | 4398 |
| CmRV1_2              | 4395 | TACCGCTCGGCCCTACCTTCTCCTCAACTTCTCCCTCGGCCCTACCTTCTTTTTTTTTTTTTTTTTTTTTTTGA         | 4474 |
| Rhesus macaque chr14 | 4399 | .....A.....                                                                        | 4478 |
| CmRV1_2              | 4475 | GACGGAGTCTGGCTCTGTGCCCCAGGCTGGAGTGCAGTGGCCAGATCTCAGCTCACTGCAAGCTCCGCCTCCCGGGTTG    | 4554 |
| Rhesus macaque chr14 | 4478 | .....                                                                              | 4557 |
| CmRV1_2              | 4555 | CGCCATCTCCTGCCTCAGCCTCCCGAGTAGCTGAGACTACAGGCGCCGCCACCTCGCCCGCTATTTTTTTGTATTTT      | 4634 |
| Rhesus macaque chr14 | 4558 | .....G.....                                                                        | 4637 |
| CmRV1_2              | 4635 | TTTTAGTAGAGACGGGATTCACCTGTGTAGCCAGGATGGTCTCGATCTCCTGACCTCGTGATCCGCCCCGTGCGGCCTC    | 4714 |
| Rhesus macaque chr14 | 4638 | .....T.....                                                                        | 4717 |
| CmRV1_2              | 4715 | CCAAAGTGCTGGGATTACAGACTTGAGCCACCACGCCCCGGCCCTCCCTCCACCCCGTCTCCTTCTCCAGCCCCGCCAA    | 4794 |
| Rhesus macaque chr14 | 4718 | .....T.....                                                                        | 4797 |
| CmRV1_2              | 4795 | GCTCACCCCTCGGACCGCCGCCAACACCTCCACGTCTCCGCTTGCGGCGGACTGAGGACCCAGATGGCCCTTCCACTT     | 4874 |
| Rhesus macaque chr14 | 4798 | .....                                                                              | 4877 |
| CmRV1_2              | 4875 | GGCAATCCTCCCTTTTTCCCTCCGTAAGTCAATCGCACGGTCCAGTACTGGCCCTTCTCTGCCTCTGACCTCTACAAC     | 4954 |
| Rhesus macaque chr14 | 4878 | .....                                                                              | 4957 |

|                      |      |                                                                                     |      |
|----------------------|------|-------------------------------------------------------------------------------------|------|
| CmRV1_2              | 4955 | TGGAAAACCCATAACCCCTTCCTTTTCCCAAGACCCCCAGGCCCTAACCTCGTGTGATAGAAATCCATTCCTCCTCACTACCA | 5034 |
| Rhesus macaque chr14 | 4958 | .....A.....T.....                                                                   | 5037 |
| CmRV1_2              | 5035 | GCCCACCTGGGGATGATTGCCAGCAACTCTTGCCAGGTCCTCTAACCACTGAAGAAAGGCGAGTCCCTCGGAGGCC        | 5114 |
| Rhesus macaque chr14 | 5038 | .....                                                                               | 5117 |
| CmRV1_2              | 5115 | GGAAAAATGTGCCAGGACCAGGAGGCCTCCCAACCAACTTCCCAATGAAATAGACGAGGGATTCCCTCACCCTGCCA       | 5194 |
| Rhesus macaque chr14 | 5118 | .....                                                                               | 5197 |
| CmRV1_2              | 5195 | GACTGGGACTATGAAATGGCACCAGGTAGGAGAGTCTCCAAATCTATCGCCAGGCTCTGTGGCAGGTCTCAAAGGGC       | 5274 |
| Rhesus macaque chr14 | 5198 | .....G.....                                                                         | 5277 |
| CmRV1_2              | 5275 | AGGAAAGCGCCCCACAAATTTGGCCAAGGTAAGGACCATAACTCAGGAAAGGGATGAAAGCCCGGCAGCCTTCATGGAAA    | 5354 |
| Rhesus macaque chr14 | 5278 | .....C.....C.....T.....                                                             | 5357 |
| CmRV1_2              | 5355 | GGCTTCTGGAAGGGTTCCGAATGTATACCCCATTCGATCCAGAGGCCCTAGAACATAAGGCTACCGTAGCTATGGCATT     | 5434 |
| Rhesus macaque chr14 | 5358 | .....                                                                               | 5437 |
| CmRV1_2              | 5435 | ATAGACNNNNNNNNNNNNNNNNNNNNNNNNNNNNNNNNNNNNNNNNNNNNNNNNNNNNNNNNNNNNNNNNNNNNNNNN      | 5514 |
| Rhesus macaque chr14 | 5438 | .....                                                                               | 5517 |
| CmRV1_2              | 5515 | NNNNNNNNNNNNNNNNNNNNNNNNNNNNNNNNNNNNNNNNNNNNNNNNNNNNNNNNNNNNNNNNNNNNNNNN            | 5594 |
| Rhesus macaque chr14 | 5518 | .....                                                                               | 5597 |
| CmRV1_2              | 5595 | NNNNNNNNNNNNNNNNNNNNNNNNNNNNNNNNNNNNNNNNNNNNNNNNNNNNNNNNNNNNNNNNNNNNNNNN            | 5674 |
| Rhesus macaque chr14 | 5598 | .....                                                                               | 5677 |
| CmRV1_2              | 5675 | NNNNNNNNNNNNNNNNNNNNNNNNNNNNNNNNNNNNNNNNNNNNNNNNNNNNNNNNNNNNNNNNNNNNNNNN            | 5754 |
| Rhesus macaque chr14 | 5678 | .....                                                                               | 5757 |
| CmRV1_2              | 5755 | NNNNNNNNNNNNNNNNNNNNNNNNNNNNNNNNNNNNNNNNNNNNNNNNNNNNNNNNNNNNNNNNNNNNNNNN            | 5834 |
| Rhesus macaque chr14 | 5758 | .....                                                                               | 5837 |
| CmRV1_2              | 5835 | NNNNNNNNNNNNNNNNNNNNNNNNNNNNNNNNNNNNNNNNNNNNNNNNNNNNNNNNNNNNNNNNNNNNNNNN            | 5914 |
| Rhesus macaque chr14 | 5838 | .....                                                                               | 5917 |
| CmRV1_2              | 5915 | NNNNNNNNNNNNNNNNNNNNNNNNNNNNNNNNNNNNNNNNNNNNNNNNNNNNNNNNNNNNNNNNNNNNNNNN            | 5994 |
| Rhesus macaque chr14 | 5918 | .....                                                                               | 5997 |
| CmRV1_2              | 5995 | NNNNNNNNNNNNNNNNNNNNNNNNNNNNNNNNNNNNNNNNNNNNNNNNNNNNNNNNNNNNNNNNNNNNNNNN            | 6074 |
| Rhesus macaque chr14 | 5998 | .....                                                                               | 6077 |
| CmRV1_2              | 6075 | NNNNNNNNNNNNNNNNNNNNNNNNNNNNNNNNNNNNNNNNNNNNNNNNNNNNNNNNNNNNNNNNNNNNNNNN            | 6154 |
| Rhesus macaque chr14 | 6078 | .....                                                                               | 6157 |
| CmRV1_2              | 6155 | NNNNNNNNNNNNNNNNNNNNNNNNNNNNNNNNNNNNNNNNNNNNNNNNNNNNNNNNNNNNNNNNNNNNNNNN            | 6234 |
| Rhesus macaque chr14 | 6158 | .....                                                                               | 6237 |
| CmRV1_2              | 6235 | NNNNNNNNNNNNNNNNNNNNNNNNNNNNNNNNNNNNNNNNNNNNNNNNNNNNNNNNNNNNNNNNNNNNNNNN            | 6303 |
| Rhesus macaque chr14 | 6238 | .....CTAAGTATCAA                                                                    | 6317 |
| CmRV1_2              | 6303 | -----                                                                               | 6303 |
| Rhesus macaque chr14 | 6318 | GCCCCAATCATAATGTATTTAAAGCCACGGCGGTGCCCGTGTCTATCAAGCAATATACCATGAGCCGAGAGGCTCATAT     | 6397 |
| CmRV1_2              | 6303 | -----                                                                               | 6303 |
| Rhesus macaque chr14 | 6398 | AGGAATTCGGCAGCACATTAACAATTTCTAGAACTCGGAGTGTTCGGACCTTGTTCGCTCGCCCTGGAACTCCTCTCTC     | 6477 |
| CmRV1_2              | 6303 | -----                                                                               | 6303 |
| Rhesus macaque chr14 | 6478 | TGCCAGTAAAAAGCCTGGTACTCAGGATTACAGCCTGTCCAAGACTTGAGAGAAATTAACAAAAGAACCATGGACATC      | 6557 |
| CmRV1_2              | 6303 | -----                                                                               | 6303 |
| Rhesus macaque chr14 | 6558 | CATCCCACGGTCCCCAATCCTTACAACCTACTCAGCACCTAAAACCAGGCTATAACTGGTATACAGTATTAGATTTAAA     | 6637 |
| CmRV1_2              | 6303 | -----NNNNNNNNNNNNNNNNNNNNNNNNNNNNNNNNNNNNNNNNNNNNNNNNNNNNNNNNNNNNNNNNNNNNNN         | 6328 |
| Rhesus macaque chr14 | 6638 | AGATGCTTCTCTGTTTACCTCTGGCCCTCCAAGCCAAGAAGCTTTTGCCTTT.....                           | 6717 |
| CmRV1_2              | 6329 | NNNNNNNNNNNNNNNNNNNNNNNNNNNNNNNNNNNNNNNNNNNNNNNNNNNNNNNNNNNNNNNNNNNNNNNN            | 6408 |
| Rhesus macaque chr14 | 6718 | .....                                                                               | 6797 |
| CmRV1_2              | 6409 | NNNNNNNNNNNNNNNNNNNNNNNNNNNNNNNNNNNNNNNNNNNNNNNNNNNNNNNNNNNNNNNNNNNNNNNN            | 6488 |
| Rhesus macaque chr14 | 6798 | .....                                                                               | 6877 |
| CmRV1_2              | 6489 | NNNNNNNNNNNNNNNNNNNNNNNNNNNNNNNNNNNNNNNNNNNNNNNNNNNNNNNNNNNNNNNNNNNNNNNN            | 6568 |
| Rhesus macaque chr14 | 6878 | .....                                                                               | 6957 |
| CmRV1_2              | 6569 | NNNNNNNNNNNNNNNNNNNNNNNNNNNNNNNNNNNNNNNNNNNNNNNNNNNNNNNNNNNNNNNNNNNNNNNN            | 6648 |
| Rhesus macaque chr14 | 6958 | .....                                                                               | 7037 |
| CmRV1_2              | 6649 | NNNNNNNNNNNNNNNNNNNNNNNNNNNNNNNNNNNNNNNNNNNNNNNNNNNNNNNNNNNNNNNNNNNNNNNN            | 6728 |
| Rhesus macaque chr14 | 7038 | .....                                                                               | 7117 |
| CmRV1_2              | 6729 | NNNNNNNNNNNNNNNNNNNNNNNNNNNNNNNNNNNNNNNNNNNNNNNNNNNNNNNNNNNNNNNNNNNNNNNN            | 6808 |
| Rhesus macaque chr14 | 7118 | .....                                                                               | 7197 |
| CmRV1_2              | 6809 | NNNNNNNNNNNNNNNNNNNNNNNNNNNNNNNNNNNNNNNNNNNNNNNNNNNNNNNNNNNNNNNNNNNNNNNN            | 6888 |
| Rhesus macaque chr14 | 7198 | .....                                                                               | 7277 |
| CmRV1_2              | 6889 | NNNNNNNNNNNNNNNNNNNNNNNNNNNNNNNNNNNNNNNNNNNNNNNNNNNNNNNNNNNNNNNNNNNNNNNN            | 6968 |
| Rhesus macaque chr14 | 7278 | .....                                                                               | 7357 |
| CmRV1_2              | 6969 | NNNNNNNNNNNNNNNNNNNNNNNNNNNNNNNNNNNNNNNNNNNNNNNNNNNNNNNNNNNNNNNNNNNNNNNN            | 7048 |
| Rhesus macaque chr14 | 7358 | .....                                                                               | 7437 |



|                      |       |                                                                                    |       |
|----------------------|-------|------------------------------------------------------------------------------------|-------|
| CmRV1_2              | 9529  | TATACCAAAAGCCACTGTATGGAATCCCTATCCAAATCAAATTAATAGTCAACCCCTATCACAGCCCTGTGCGAGTAGGA   | 9608  |
| Rhesus macaque chr14 | 9918  | .....                                                                              | 9997  |
| CmRV1_2              | 9609  | CCAAACCAAGTTTTATCAAAAACAAGGAAGCCCTGGTTCTGCACCAAGAGAGCCCCAACCAAGAGCTCTAAAAGCAC      | 9688  |
| Rhesus macaque chr14 | 9998  | .....                                                                              | 10077 |
| CmRV1_2              | 9689  | TTCCCCGCCTCTAATCTCCACCTCTCTAAATACACACCCTCAGCCCAAACGTCACCCGCGGGCCCTTGACCTGGGAA      | 9768  |
| Rhesus macaque chr14 | 10078 | .....T.....                                                                        | 10157 |
| CmRV1_2              | 9769  | TAGGTGACAGGCTCTAAATCTCATAAAGGGCTCTATTTCGCTTTAAACCAGACAAAGCCAGAATTTACCTCTCTTGC      | 9848  |
| Rhesus macaque chr14 | 10158 | .....                                                                              | 10237 |
| CmRV1_2              | 9849  | TGGCTATGTCTGGCAACAGGCCCCCTTACTATGAAGGCATTGCCTCCACTAATAATTTCACTAACTCCGCCAATCTAC     | 9928  |
| Rhesus macaque chr14 | 10238 | .....                                                                              | 10317 |
| CmRV1_2              | 9929  | TGGATGCGCATGGGAACAACAAGAAAATAACCCCTGGCTGAAGTTTCTGGGTGAGAACCTGCATAGGTCAAGTGCCCC     | 10008 |
| Rhesus macaque chr14 | 10318 | .....G.....C.....                                                                  | 10397 |
| CmRV1_2              | 10009 | CTAGTCATCAGCATCTTTGTAATGTAACTTGACAGTACCAGCTCCAATCACTATTGGTCCCTCCGAGACGGACTGG       | 10088 |
| Rhesus macaque chr14 | 10398 | .....                                                                              | 10477 |
| CmRV1_2              | 10089 | TGGGCTTGCAACACTGGGCTCACCCCTGTGTATCCACAGCCGTTTTTAGCAGTGGCACCCACTATTGCGTGTGGTACA     | 10168 |
| Rhesus macaque chr14 | 10478 | .....                                                                              | 10557 |
| CmRV1_2              | 10169 | AGTTGTTCCCGAGTATACTATCACTCTGGAGACTCCTTTGATCTCCGATGAGCAAAAACCTCATACTAGACCAAAGA      | 10248 |
| Rhesus macaque chr14 | 10558 | .....                                                                              | 10637 |
| CmRV1_2              | 10249 | GAGAACCTATCTCCCTCACCCCTCGCCGTAATGTTAGGAATTGGGGTAGCGCTGGAGTTGGGACCGGACAGCAGCCCTA    | 10328 |
| Rhesus macaque chr14 | 10638 | .....                                                                              | 10717 |
| CmRV1_2              | 10329 | GTGCATGGTAACCATCATCTGCAACAACCTAGAGTAGCCATAGATGAAGACCTTAGAGCCATAGAACAATCCATCACAAA   | 10408 |
| Rhesus macaque chr14 | 10718 | .....                                                                              | 10797 |
| CmRV1_2              | 10409 | ACTTGAAGAGTCTTACTCTCTGTCTGAAGTTGATTACAAAACCGACGAGGACTAGAAATTGCTTTCTGAAAGAGG        | 10488 |
| Rhesus macaque chr14 | 10798 | .....C.....                                                                        | 10877 |
| CmRV1_2              | 10489 | GCGGGCTCTGTGCAGCCCTGAAAGGCAATGTTGTTTTATGCAGATCATTAGGAGTAGTTAAAGATTCTATGGCAAAA      | 10568 |
| Rhesus macaque chr14 | 10878 | .....                                                                              | 10957 |
| CmRV1_2              | 10569 | CTGAGAGAAAGATTAGACAAGAGGAAAAAGAGAGAGAACTCAGCAAAATGGTTTGAATAATGGTACAACCAATCCCC      | 10648 |
| Rhesus macaque chr14 | 10958 | ..A.....A.....                                                                     | 11037 |
| CmRV1_2              | 10649 | TTGGCTTAGCACCCCTAATCTCCACCATCTTAGACCCCTCATCTGCTCAGCTCATCTGACTTTTCGGGCCATGCATAC     | 10728 |
| Rhesus macaque chr14 | 11038 | .....                                                                              | 11117 |
| CmRV1_2              | 10729 | TCAACCGCTTACTCACCCCTTATTAATAATAGATTAAACATAGTACATGCTATGGTTCTGACCCAACAATACCAGACCCCTC | 10808 |
| Rhesus macaque chr14 | 11118 | .....                                                                              | 11197 |
| CmRV1_2              | 10809 | AGGACTGAGAAGAGGCTCAAGATTGAGGCTCTGACACAAAAGAGGAGGAAATGAACTAGGCCTCATAAACTTAGAA       | 10888 |
| Rhesus macaque chr14 | 11198 | .....                                                                              | 11277 |
| CmRV1_2              | 10889 | ACTAGGCCTCATATAG-AAAAATTAACACCAGGTGGCTCTGGATAGGGTCCCACCTGCCTCGATAGGGACCCACCTGA     | 10967 |
| Rhesus macaque chr14 | 11278 | .....A.....                                                                        | 11357 |
| CmRV1_2              | 10968 | TAGGGTCCCACCTGCCAATTCGGGAAACAACCTCATGGGGTCCCACCTGCCAATTCGGGGTCCCACCTGCCTCG         | 11047 |
| Rhesus macaque chr14 | 11358 | .....                                                                              | 11437 |
| CmRV1_2              | 11048 | AAGTTCGGGAATCAACAACCTCCAGGAAAAAACCTCATAAGGTCCTGCTCTAACCAATTAGCATAAGACACCTTGCTCA    | 11127 |
| Rhesus macaque chr14 | 11438 | .....                                                                              | 11517 |
| CmRV1_2              | 11128 | GGCCATAGCTAGACCAATCATTTTGCCTTAAGCTTTGTTGAATTTTCGCGCCATAAGCTGTGTTGAACTTGTGTTT       | 11207 |
| Rhesus macaque chr14 | 11518 | .....                                                                              | 11597 |
| CmRV1_2              | 11208 | GCCTATATAAACAGCCTGTAACAGCAGTCGGGGTCCCAGGGCCAACCTTAGAGCTTGGGACCCCTAGTGCCTAGTAATAA   | 11287 |
| Rhesus macaque chr14 | 11598 | .....                                                                              | 11677 |
| CmRV1_2              | 11288 | ATAACTCTCTGCTGTGAATCTCGTGTCCGGTATCCTTCAGGCGACCCCTGCCAGGAGGGAATCGACAGTTCGGTTCCA     | 11367 |
| Rhesus macaque chr14 | 11678 | .....G.....                                                                        | 11757 |
| CmRV1_2              | 11368 | ACAGCCTCACTGTAGCCTTGAACCTCTGTGTCAAGTATCCAGAACTTACAGCTCCCAATTAATAATAGTTCTCAAAA      | 11447 |
| Rhesus macaque chr14 | 11758 | .....                                                                              | 11837 |
| CmRV1_2              | 11448 | AAAAAATAGTTCTCAGGCCGGGCGGTGACTCACACCTGTAATCCAGCACTTTGGAAGGCTGAGTGGTTCGGGG          | 11527 |
| Rhesus macaque chr14 | 11838 | .....A.....                                                                        | 11917 |
| CmRV1_2              | 11528 | CAGAGGGGGGAAATCACCTGAGGTTGGGAGTTGAGACCATCCTGCCAACATGGAGAACCCTCTCTACTAAAATA         | 11607 |
| Rhesus macaque chr14 | 11918 | .....                                                                              | 11997 |
| CmRV1_2              | 11608 | CAAAATTAACGGGCTGGTGGCGCATACCTGTAATCCAGCTACTCTGGAGCCTGAGGCAGGAGAATTGCTTGAACCCG      | 11687 |
| Rhesus macaque chr14 | 11998 | .....                                                                              | 12077 |
| CmRV1_2              | 11688 | GGAGGCGGAGGTTGCAGTGAAGTGCAGTGCCTGACTTACAGCCTGGGCAACAAGAGCGAAGCTCCATCTCAAAAA        | 11767 |
| Rhesus macaque chr14 | 12078 | .....T.....                                                                        | 12157 |
| CmRV1_2              | 11768 | TAAAAAAGAAATAAATAATAATAAGTTCTCTTTCTTCCAGAGTTAAGTACCAGATCAATAAAATATATTTCTT          | 11847 |
| Rhesus macaque chr14 | 12158 | .....                                                                              | 12237 |
| CmRV1_2              | 11848 | TTTAGAGACAGGCTCACCCTGTTACCCAGGCTGGAGTGCAGTGGCATAATCATAGCTCGCTGCCCTCGATTCTCTG       | 11927 |
| Rhesus macaque chr14 | 12238 | .....                                                                              | 12317 |
| CmRV1_2              | 11928 | GGCTCAAGTATCATCTGCCTCCGCTCTGGAGTAGCTGGGACTATAGGTTGCACCACCCATGCCAGCTGATTTTTG        | 12007 |
| Rhesus macaque chr14 | 12318 | .....                                                                              | 12397 |

env ←

→ 3'LTR

3' LTR ← → 3' flanking

Target site duplication

|                      |       |                                                                                     |       |
|----------------------|-------|-------------------------------------------------------------------------------------|-------|
| CmRV1_2              | 12008 | TAGGTTTTGTAGAGATGGCATCTTGCTATATTGCCTGGACTGGTCTGGAACCTCCTAGCCTGAAGTGATCCTCCCACCTCA   | 12087 |
| Rhesus macaque chr14 | 12398 | .....G.....                                                                         | 12477 |
| CmRV1_2              | 12088 | ACCCCCAAGGTGCCGGAATTATAAATGTCAGCCACGGAGAGTTCATATTCTGAATACCAAAGCCAAATAGAGTCCACAG     | 12167 |
| Rhesus macaque chr14 | 12478 | .....                                                                               | 12557 |
| CmRV1_2              | 12168 | GGTTTTTTTTTTTTTTTTTTTTTTTTTTTTTTGAGACGGAGTCTCACTCTGTGCGCCAGGCTGGAGTGCAGTGGCGCGATCTC | 12247 |
| Rhesus macaque chr14 | 12558 | ...-...G.....G.....                                                                 | 12636 |
| CmRV1_2              | 12248 | GGCTCACTGCAACCTTCGCCTCCCGGGTTCACGCCATTCTCCTGCCTCAGCCTCCCAAGTAGCTGGGACTACAGGCACCT    | 12327 |
| Rhesus macaque chr14 | 12637 | .....                                                                               | 12716 |
| CmRV1_2              | 12328 | GCCACCAGCCTGGCCAATTTTTGTATTTTTAGTAGAGACAGGGTTTCACTGTGTTAGCCAGGATGGTCTCGATCTCCT      | 12407 |
| Rhesus macaque chr14 | 12717 | .....                                                                               | 12796 |
| CmRV1_2              | 12408 | GACCTTGATCCACCCGCTCGGCCTCCCAAAGTGTGGATTACAGGCATGAGCCACCACCGCCGCGAGAACATGG           | 12487 |
| Rhesus macaque chr14 | 12797 | ....C.....C.....                                                                    | 12876 |
| CmRV1_2              | 12488 | ATTTTAAATGTCATGGGTCCACTTATATGCAGATCAAATAACACAGTGCATCAAATACTGTATTAGGCTGGGTGCAG       | 12567 |
| Rhesus macaque chr14 | 12877 | .....                                                                               | 12956 |
| CmRV1_2              | 12568 | TGGCTCACACTTGTAAATCCCAACATTTTGGGAGGCCAAGGTGGGAGGATCGCTTGAGCTCAGGAATCCAGGCTTCAGTG    | 12647 |
| Rhesus macaque chr14 | 12957 | .....G.....                                                                         | 13036 |
| CmRV1_2              | 12648 | AGCTGTGATCGTCCATTGCACCCAGCCTGGGCAACAGAGAAATACCCTGTCTCAAAAAACAAACACACAAACAGTA        | 12727 |
| Rhesus macaque chr14 | 13037 | .....                                                                               | 13116 |
| CmRV1_2              | 12728 | TTCAAGGGTTATGAAACCTGAGTATGTAGAGTTTTCCCTATAAGTGGGTTCTGCAGGGTCAACTTCACAATTTGAGTATGT   | 12807 |
| Rhesus macaque chr14 | 13117 | .....                                                                               | 13196 |
| CmRV1_2              | 12808 | GCAGACTTCATTATGGTAGAGCCAGGTGGAGGTCCTGGAATCAATCCCCTGTGTATACAGTGTAACTGTACTTCTTTTTT    | 12887 |
| Rhesus macaque chr14 | 13197 | .....C.....                                                                         | 13276 |
| CmRV1_2              | 12888 | TTTTCTTCTTCTCTTTTTGAGACACAGTCTTGCTCTGTCAACCAGGATGGAGTGCAGTGGCGCAATCTGGCTCACTG       | 12967 |
| Rhesus macaque chr14 | 13277 | .....                                                                               | 13356 |
| CmRV1_2              | 12968 | CAACCTCCTCCACCTCCAGGTTCAAGTGATTCTCCTGCCTCAAAAAAAAAATAAATAAATAAATAAATAAGTAAACAAA     | 13047 |
| Rhesus macaque chr14 | 13357 | .....                                                                               | 13436 |
| CmRV1_2              | 13048 | AGAAAACAGAAGTGAGGGAAGTAAGGTACAGAAATAGCTGGATTGGTTGCAGCTTGGCATTATTTGACATGAT           | 13127 |
| Rhesus macaque chr14 | 13437 | .....                                                                               | 13516 |
| CmRV1_2              | 13128 | TTGAACAGTTGCTGCCTGTGATTTCTGGTTGGCTGGGACTATAGGCACACGCCACCACACCCGGCTAATTTTTGTATTT     | 13207 |
| Rhesus macaque chr14 | 13517 | .....TG.....                                                                        | 13596 |
| CmRV1_2              | 13208 | TTAGTAGAGACGGAGTTTACCATGTTGGCCAGGATGGTCTTGATCTCCTGACCTCGTGATCCACCCACCTTGGCCTCCC     | 13287 |
| Rhesus macaque chr14 | 13597 | .....                                                                               | 13676 |
| CmRV1_2              | 13288 | AAAGTGCTAGGATTACTGGCGTGAGCCACCACACCCAGCCTAGTTAACTGTACTTCTAAAATGAACCTATTACTTTACCA    | 13367 |
| Rhesus macaque chr14 | 13677 | .....                                                                               | 13756 |
| CmRV1_2              | 13368 | AAAGCTATTCAATTCTCCACACTACATATGCCTACATTACACATTTGAGGCAGATTGGAAATCCATTATTTTTCAAC       | 13447 |
| Rhesus macaque chr14 | 13757 | .....                                                                               | 13836 |
| CmRV1_2              | 13448 | CAACCATAGATCCTTTTCTGAACATTTTTCTTAACACCTATAATTTAACCTTAAATAAGTAAACTCTTTAATCTAGGGGT    | 13527 |
| Rhesus macaque chr14 | 13837 | .....                                                                               | 13916 |
| CmRV1_2              | 13528 | TATTACTGAAATACCTGTATTTTATCCCTCAAAGCCATTTTCTAGCTGCTGAGGAGCTGGCCCTTAGGGACATTTCTG      | 13607 |
| Rhesus macaque chr14 | 13917 | .....                                                                               | 13996 |
| CmRV1_2              | 13608 | ACTAGATCATTCTGAAAGGAATCCATAGCTTAAAGAGCAGTCACACCTGTCAATCAGTCATAGCCTGCGGCTTCAAA       | 13687 |
| Rhesus macaque chr14 | 13997 | .....                                                                               | 14076 |
| CmRV1_2              | 13688 | TCCAGTGTCTCAGAAGCCACTGGCAAAAAACATTTAGAGTGAAGCAGAGAAGAACATGTTTCTTTATTTCTTCTTTCT      | 13767 |
| Rhesus macaque chr14 | 14077 | .....C.....                                                                         | 14156 |
| CmRV1_2              | 13768 | CTATTCTTTTCTAACATTTTCCCTTCATTGTCACTTAGCTCCTCAATCCACACAAGAATTCAATCATTCAACAAGATC      | 13847 |
| Rhesus macaque chr14 | 14157 | .....                                                                               | 14236 |
| CmRV1_2              | 13848 | ATTTTATTATAATATAAATT                                                                | 13867 |
| Rhesus macaque chr14 | 14237 | .....                                                                               | 14256 |

**Figure S14. Alignment of the nucleotide sequence between CmRV1\_2 and its ortholog in rhesus macaque.** The proviral sequences with the flanking sequences, 5' and 3' LTRs, *gag*, *pol*, and *env* genes are shown. Flanking 4-bp target site duplication (TSD) sequences are shown in gray. Dots indicate identical nucleotide sequences, and dashes indicate the missing nucleotides. N indicates nucleotide gaps or not determined. Nucleotide sequences encoding Env are highlighted in green.

## CmRV-trunc1

1 METPTLQGPQDKTLSYLTPELLLALLPCAAGSNNPRGHMKPPGYIFIDNNPHRPYNLTW 60  
61 QVINFNNEVLGETSKIAPIGTWFPDLYFNLDKVGAVNEMEGGEWRKQARRVSI SRNGFY 120  
121 ACPGFRTGDMEKTCGDITHLYCYSWSCVTNNDGEWKWATKPWYITMSFVQPCTRTRYSKN 180  
181 CNLVRIKFEDAASDNSWITGLIWGLYLYQKPLYGIPIQIRLLVDPDIAPVAVGLNQVLS 240  
241 EEKPPVPIPEKPQPKAPQSTSPPLISASSEYTSSAQNVTR 281

## PNRC2-ChRV

1 METSSLQGGPPQDKTFPCLTPHLLLTFLFPWVVGSSNPHQPYRLTWQITNFKTHEVLNETS 60  
61 HVAPLNTWFPDLYFNLDKIAMIDEMEGGEWRKQARRVLSRNGFYVCPGFRTGPMKKTCTG 120  
121 EIMSLYCASWSCVTTNDGEWKWKTQPWYLTMSYVQPCTRTRYSATCNLIRVKFEEAAKTD 180  
181 PRWTTGLIWGLNLYQTPAAGLPIQIRLLVNPVSASVPVGPVNPVLTGRAPSQ 231

## PNRC2-BoRV

1 METSSLQGGPPQDKTFPCLTPHLLLTFLFPWVVGSSNPHQPYRLTWQITNFKTHEVLNETS 60  
61 HVAPLNTWFPDLYFNLDKIAMTDEMEGGEWRKQARRVLSRNGFYVCPGFRTGPMKKTCTG 120  
121 EIMSLYCASWSCVTTNDGEWKWKTQPWYLTMSYVQPCTRTRYSATCNLIRVKFEEAAKTD 180  
181 PRWTTGLIWGLNLYQTPAAGLPIQIRLLVNPVSASVPVGPVNPVLTGRAPSQ 231

## BoRV-7

1 METSSLQGGPPQDKTRPCLTPHLLLALFLFPWVIGSSNPHQPYRLTWQITNFETHEVLNETS 60  
61 HVAPLNTWFPDLYFNLDKIAMIDEMEGGEWRKQARRVLSRNGFYVCPGFRTGPMKKTCTG 120  
121 EIMSLYCASWSCVTTNDGEWKWETQPWYLTMSYVQPCTRTRYSATCNLIRVKFEEAAKTD 180  
181 PRWTTGLIWGLNLYQTPASGLPIQIRLLVNPVSASVPVGPVNPVLTGRAPS 230

## GoRV-trunc1

1 METSSLRGGPPQDKTLPCLTPHLLLTALFLFPWVTGNGNPYQPYQLTWQVTNFETHEVLNE 60  
61 TSHVAPLNTWFPDLYFNLDQIARINEMEGGEWRKNARRVLSRNGFYACPGFRTGPMKKT 120  
121 CGEITSLYCASWSCVTTNDGESKWKTPWYVTMTYVRPCTRTRYSATCNLIRIKFEEAAK 180  
181 TDSRWTSGLIWGLNLYQTPAFGVPIQIKLIVNPASAPVPIGPNQVLTGKAPPSSRSRQKV 240  
241 PTAAPTSSPSALPGTTPLPPDPETSNRLFHLIRGAYLALNQTKPESTASCWLCLATGPP 300  
301 YYEGIASVSNFTNSTNHSGCAWERHKKLTLSEVSGSGTCIGKVPPSHQHLNVTTLTVPST 360  
361 SHYLIPSGTDWWACDTGLTPCLPLAYPQLSSTTVKIIVHCYRLCPEFITKLENLSSSSLS 420  
421 KNISLEGRENLFPSPLL 439

## CERV2 provirus (ChrY)

1 METSSLQGGPPQDKTLPCLTPHLLLALFLFPWVIGSSNPHQPYRLTWQITNFETHEVLNETS 60  
61 HIAPLNTWFPDLYFNLDKIAMINEMEGGEWRKQARKVLSRNGFYVCPGFRTGPMKKTCTG 120  
121 EIMSLYCASWSCVTTNDGEWKWKTQLWYVTMSYVQPCTRTRYSATCNLICVKFEEAAKTD 180  
181 PRWTTGLI 188



**Figure S15. DNA synthesis of ERV *Env* genes.** All sequences represent truncated Env proteins from primates including crab-eating macaque (CmRV-trunc1), chimpanzee [PNRC2-ChRV, CERV2 provirus (ChrY)], bonobo (PNRC2-BoRV, BoRV-7), and gorilla (GoRV-trunc1). Chr, chromosome.

**Table S1. Characteristics of primate ERVs used in this study.**

| ERV                   | Host                | Chromosome: position       | Length of amino acids | Properties                 | Accession no.            |
|-----------------------|---------------------|----------------------------|-----------------------|----------------------------|--------------------------|
| PNRC2-BoRV            | Bonobo              | chr1: 23161794-23162489    | 231                   | Truncated Env              | NC_048239.1              |
| BoRV-7                | Bonobo              | chr7: 59391503-59392195    | 230                   | Truncated Env              | NC_048246.1              |
| PNRC2-ChRV            | Chimpanzee          | chr1: 22537082-22537777    | 231                   | Truncated Env              | XM_016938622.2           |
| CERV2                 | Chimpanzee          |                            | 651                   | Infectious Env (extinct)   |                          |
| CERV2-trunc           | Chimpanzee          |                            | 188                   | Truncated Env (artificial) |                          |
| CERV2 provirus (ChrY) | Chimpanzee          | chrY: 20227411-20227977    | 188                   | Truncated Env              | AY692037.1               |
| CmRV1                 | Crab-eating macaque |                            | 626                   | Intact full Env            | KT330768.1<br>KT330663.1 |
| CmRV1_1               | Crab-eating macaque | chr13: 2014693-2016573     | 626                   | Intact full Env            | NC_022284.1              |
| CmRV1_2               | Crab-eating macaque | chr14: 109894221-109896104 | 626                   | Intact full Env            | NC_022285.1              |
| CmRV-trunc1           | Crab-eating macaque | chr1: 104267714-104268559  | 281                   | Truncated Env              | XM_015429990.1           |
| RmRV1                 | Rhesus macaque      | chr11: 104718341-104720221 | 626                   | Intact full Env            | NC_041764.1              |
| RmRV1                 | Rhesus macaque      |                            | 626                   | Intact full Env            | KT330634.1               |
| RmRV-trunc1           | Rhesus macaque      | chr1: 103221116-103221961  | 281                   | Truncated Env              | NC_041754.1              |
| RhERV2-A              | Rhesus macaque      |                            | 626                   | Infectious Env (extinct)   |                          |
| GoRV-trunc1           | Gorilla             | chr1: 45572110-45573429    | 439                   | Truncated Env              | NC_044602.1              |

PNRC2, proline rich nuclear receptor coactivator 2; trunc, truncated, ChRV, chimpanzee ERV; BoRV, bonobo ERV; CERV, chimpanzee ERV; CmRV, crab-eating macaque ERV; RmRV, rhesus macaque ERV, RhERV, rhesus macaque ERV; GoRV, gorilla ERV. CmRV *env* genes were found in two loci in the crab-eating macaque genome.

**Table S2. Infection tropism of RmRV1/CmRV1, CERV2, and FeLV-D (ON-T) Env-pseudotyped viruses**

| Species                                                 | Cell    | RmRV1/CmRV1                   | CERV2                         | FeLV-D (ON-T)                 |
|---------------------------------------------------------|---------|-------------------------------|-------------------------------|-------------------------------|
| Human<br>( <i>Homo sapiens</i> )                        | HepG2   | $(9.93 \pm 2.34) \times 10^2$ | $(2.19 \pm 0.71) \times 10^3$ | $(1.37 \pm 0.22) \times 10^4$ |
|                                                         | HEK293T | $(4.02 \pm 1.86) \times 10^3$ | $(9.67 \pm 0.72) \times 10^2$ | $(3.65 \pm 0.21) \times 10^4$ |
| Cat<br>( <i>Felis catus</i> )                           | CRFK    | $(2.56 \pm 0.15) \times 10^3$ | $(1.24 \pm 0.04) \times 10^3$ | $(6.75 \pm 0.70) \times 10^2$ |
| African green monkey<br>( <i>Chlorocebus aethiops</i> ) | Vero    | $(7.47 \pm 1.64) \times 10^1$ | $(5.00 \pm 0.20) \times 10^1$ | $(7.60 \pm 2.40) \times 10^1$ |
|                                                         | Cos7    | $(2.28 \pm 0.51) \times 10^2$ | $(1.35 \pm 0.24) \times 10^3$ | $(1.24 \pm 0.20) \times 10^2$ |
| Earth-colored Mouse<br>( <i>Mus dunnii</i> )            | MDTF    | 0                             | $6.40 \pm 5.20$               | 0                             |
| Golden hamster<br>( <i>Mesocricetus auratus</i> )       | BHK21   | 0                             | 0                             | 0                             |
| Guinea pig<br>( <i>Cavia porcellus</i> )                | 104C1   | $(1.58 \pm 0.26) \times 10^3$ | $(5.16 \pm 0.40) \times 10^2$ | 0                             |
| Dog<br>( <i>Canis familiaris</i> )                      | KwDM    | $(9.79 \pm 0.45) \times 10^3$ | $(1.37 \pm 0.02) \times 10^3$ | $(5.99 \pm 0.03) \times 10^3$ |
| Cattle<br>( <i>Bos taurus</i> )                         | MDBK    | $(1.66 \pm 0.20) \times 10^3$ | $(1.63 \pm 0.00) \times 10^3$ | $(3.78 \pm 0.03) \times 10^3$ |

Titers are expressed in infectious units/mL. Infective titers with standard deviations were means of three independent infection experiments.

**Dataset S1.** SRA Run accession, genome file, and gene annotation file used for the mapping analysis.

**Dataset S2.** Sequence accession numbers used for phylogenetic analyses.
